# Supplementary material for: Implementation of a strategy involving a multidisciplinary mobile unit team to prevent hospital admission in nursing home residents: protocol of a quasi-experimental study (MMU-1 study)
Source: PubMed Central journal article supplement — BMJ Open. 2020 Feb 17;10(2):e034742. doi: 10.1136/bmjopen-2019-034742 (PMC7045229; doi:10.1136/bmjopen-2019-034742), 2020-02-17
Supplement: bmjopen-2019-034742.draft_revisions.pdf [file bmjopen-2019-034742.draft_revisions.pdf]

# BMJ Open

BMJ Open is committed to open peer review. As part of this commitment we make the peer review history of every article we publish publicly available.

When an article is published we post the peer reviewers' comments and the authors' responses online. We also post the versions of the paper that were used during peer review. These are the versions that the peer review comments apply to.

The versions of the paper that follow are the versions that were submitted during the peer review process. They are not the versions of record or the final published versions. They should not be cited or distributed as the published version of this manuscript.

BMJ Open is an open access journal and the full, final, typeset and author-corrected version of record of the manuscript is available on our site with no access controls, subscription charges or pay-per-view fees (<http://bmjopen.bmj.com>).

If you have any questions on BMJ Open's open peer review process please email [info.bmjopen@bmj.com](mailto:info.bmjopen@bmj.com)

# BMJ Open

## Implementation of a strategy involving a multidisciplinary mobile unit team to prevent hospital admission in nursing home residents: protocol of a quasi-experimental study (MMU-1 Study)

|                               |                                                                                                                                                                                                                                                                                                                                                                                                                                                                                                                                                                                                                                                                                                                                                                                                                                                                                                                                                                                                                                                                                                                                                                                                                                                                                                                                                                                            |
|-------------------------------|--------------------------------------------------------------------------------------------------------------------------------------------------------------------------------------------------------------------------------------------------------------------------------------------------------------------------------------------------------------------------------------------------------------------------------------------------------------------------------------------------------------------------------------------------------------------------------------------------------------------------------------------------------------------------------------------------------------------------------------------------------------------------------------------------------------------------------------------------------------------------------------------------------------------------------------------------------------------------------------------------------------------------------------------------------------------------------------------------------------------------------------------------------------------------------------------------------------------------------------------------------------------------------------------------------------------------------------------------------------------------------------------|
| Journal:                      | <i>BMJ Open</i>                                                                                                                                                                                                                                                                                                                                                                                                                                                                                                                                                                                                                                                                                                                                                                                                                                                                                                                                                                                                                                                                                                                                                                                                                                                                                                                                                                            |
| Manuscript ID                 | bmjopen-2019-034742                                                                                                                                                                                                                                                                                                                                                                                                                                                                                                                                                                                                                                                                                                                                                                                                                                                                                                                                                                                                                                                                                                                                                                                                                                                                                                                                                                        |
| Article Type:                 | Protocol                                                                                                                                                                                                                                                                                                                                                                                                                                                                                                                                                                                                                                                                                                                                                                                                                                                                                                                                                                                                                                                                                                                                                                                                                                                                                                                                                                                   |
| Date Submitted by the Author: | 03-Oct-2019                                                                                                                                                                                                                                                                                                                                                                                                                                                                                                                                                                                                                                                                                                                                                                                                                                                                                                                                                                                                                                                                                                                                                                                                                                                                                                                                                                                |
| Complete List of Authors:     | Nouvenne, Antonio; Azienda Ospedaliero-Universitaria di Parma, Geriatric-Rehabilitation Department<br>Caminiti, Caterina; Azienda Ospedaliero-Universitaria di Parma, Research and Innovation Unit<br>Diodati, Francesca; Azienda Ospedaliero-Universitaria di Parma, Research and Innovation Unit<br>Iezzi, Elisa; Azienda Ospedaliero-Universitaria di Parma, Research and Innovation Unit<br>Prati, Beatrice; Azienda Ospedaliero-Universitaria di Parma, Geriatric-Rehabilitation Department<br>Lucertini, Stefano; Azienda Unità Sanitaria Locale di Parma, Primary Care Department<br>Schianchi, Paolo; Azienda Unità Sanitaria Locale di Parma, Primary Care Department<br>Pascale, Federica; Azienda Unità Sanitaria Locale di Parma, Primary Care Department<br>Starcich, Bruno; Azienda Unità Sanitaria Locale di Parma, Primary Care Department<br>Manotti, Pietro; Azienda Ospedaliero-Universitaria di Parma, Medical Direction<br>Brianti, Ettore; Azienda Ospedaliero-Universitaria di Parma, Medical Direction<br>Fabi, Massimo; Azienda Ospedaliero-Universitaria di Parma, General Manager<br>Ticinesi, Andrea; Azienda Ospedaliero-Universitaria di Parma, Geriatric-Rehabilitation Department<br>Meschi, Tiziana; Azienda Ospedaliero-Universitaria di Parma, Geriatric-Rehabilitation Department; Università degli studi di Parma, Department of Medicine and Surgery |
| Keywords:                     | Organisation of health services < HEALTH SERVICES ADMINISTRATION & MANAGEMENT, Quality in health care < HEALTH SERVICES ADMINISTRATION & MANAGEMENT, GERIATRIC MEDICINE                                                                                                                                                                                                                                                                                                                                                                                                                                                                                                                                                                                                                                                                                                                                                                                                                                                                                                                                                                                                                                                                                                                                                                                                                    |
|                               |                                                                                                                                                                                                                                                                                                                                                                                                                                                                                                                                                                                                                                                                                                                                                                                                                                                                                                                                                                                                                                                                                                                                                                                                                                                                                                                                                                                            |

1  
2  
3  
4  
5  
6  
7  
8  
9  
10  
11  
12  
13  
14  
15  
16  
17  
18  
19  
20  
21  
22  
23  
24  
25  
26  
27  
28  
29  
30  
31  
32  
33  
34  
35  
36  
37  
38  
39  
40  
41  
42  
43  
44  
45  
46  
47  
48  
49  
50  
51  
52  
53  
54  
55  
56  
57  
58  
59  
60

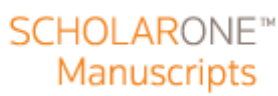

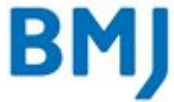

I, the Submitting Author has the right to grant and does grant on behalf of all authors of the Work (as defined in the below author licence), an exclusive licence and/or a non-exclusive licence for contributions from authors who are: i) UK Crown employees; ii) where BMJ has agreed a CC-BY licence shall apply, and/or iii) in accordance with the terms applicable for US Federal Government officers or employees acting as part of their official duties; on a worldwide, perpetual, irrevocable, royalty-free basis to BMJ Publishing Group Ltd ("BMJ") its licensees and where the relevant Journal is co-owned by BMJ to the co-owners of the Journal, to publish the Work in this journal and any other BMJ products and to exploit all rights, as set out in our [licence](#).

The Submitting Author accepts and understands that any supply made under these terms is made by BMJ to the Submitting Author unless you are acting as an employee on behalf of your employer or a postgraduate student of an affiliated institution which is paying any applicable article publishing charge ("APC") for Open Access articles. Where the Submitting Author wishes to make the Work available on an Open Access basis (and intends to pay the relevant APC), the terms of reuse of such Open Access shall be governed by a Creative Commons licence – details of these licences and which [Creative Commons](#) licence will apply to this Work are set out in our licence referred to above.

Other than as permitted in any relevant BMJ Author's Self Archiving Policies, I confirm this Work has not been accepted for publication elsewhere, is not being considered for publication elsewhere and does not duplicate material already published. I confirm all authors consent to publication of this Work and authorise the granting of this licence.

1 **Implementation of a strategy involving a multidisciplinary mobile unit team to prevent hospital**  
2  
3 **admission in nursing home residents: protocol of a quasi-experimental study (MMU-1 Study)**  
4  
5  
6

7 Antonio Nouvenne<sup>1</sup>, Caterina Caminiti<sup>2</sup>, Francesca Diodati<sup>2</sup>, Elisa Iezzi<sup>2</sup>, Beatrice Prati<sup>1</sup>, Stefano Lucertini<sup>3</sup>,  
8  
9 Paolo Schianchi<sup>3</sup>, Federica Pascale<sup>3</sup>, Bruno Starcich<sup>3</sup>, Pietro Manotti<sup>4</sup>, Ettore Brianti<sup>4</sup>, Massimo Fabi<sup>5</sup>,  
10  
11 Andrea Ticinesi<sup>1\*</sup>, Tiziana Meschi<sup>1,6</sup>  
12  
13  
14  
15

16 <sup>1</sup>Geriatric Rehabilitation Department, Azienda Ospedaliero-Universitaria di Parma, Via Antonio Gramsci 14,  
17  
18 43126 Parma, Italy  
19

20 <sup>2</sup>Research and Innovation Unit, Azienda Ospedaliero-Universitaria di Parma, Via Antonio Gramsci 14,  
21  
22 43126 Parma, Italy  
23

24 <sup>3</sup>Primary Care Department, Azienda Unità Sanitaria Locale di Parma, Strada del Quartiere 2/A, 43125  
25  
26 Parma, Italy  
27

28 <sup>4</sup>Medical Direction, Azienda Ospedaliero-Universitaria di Parma, Via Antonio Gramsci 14, 43126 Parma,  
29  
30 Italy  
31

32 <sup>5</sup>General Manager, Azienda Ospedaliero-Universitaria di Parma, Via Antonio Gramsci 14, 43126 Parma,  
33  
34 Italy  
35  
36

37 <sup>6</sup>Department of Medicine and Surgery, University of Parma, Via Antonio Gramsci 14, 43126 Parma, Italy  
38  
39  
40  
41  
42

43 **Corresponding author:**  
44

45  
46 \*Andrea Ticinesi, MD, PhD, Geriatric-Rehabilitation Department, Parma University-Hospital (Azienda  
47  
48 Ospedaliero-Universitaria di Parma), via Antonio Gramsci 14, 43126 Parma, Italy.  
49

50  
51 Work Telephone number: 0039-0521703871; Mobile: 00393471845191; Fax: 0039-0521702383  
52

53 E-mail address: [aticinesi@ao.pr.it](mailto:aticinesi@ao.pr.it)  
54

55 **Word count:** 3165  
56

57 **Abstract:** 300; **Tables:** 1; **Figures:** 2; **References:** 18  
58

59 **Running Title:** Multidisciplinary mobile unit intervention for nursing homes  
60

## ABSTRACT

**Introduction-** Nursing home residents represent a particularly vulnerable population experiencing high risk of unplanned hospital admissions, but few interventions have proved effective in reducing this risk. The aim of this research will be to verify the effects of a hospital-based multidisciplinary mobile unit (MMU) team intervention delivering urgent care to nursing home residents directly at their bedside.

**Methods and analysis-** Four nursing homes based in the Parma province, in Northern Italy, will be involved in this prospective, pragmatic, multicenter, 18-month quasi-experimental study (sequential design with two cohorts). The residents of two nursing homes will receive the MMU team care intervention. In case of urgent care needs, the nursing home physician will contact the hospital physician responsible for the MMU team by phone. The case will be triaged as a) manageable by phone advice, b) requiring urgent assessment by the MMU team or c) requiring immediate ED referral. MMU team is composed of one senior physician and one Emergency-Medicine resident chosen within the staff of Internal Medicine and Critical Subacute Care Unit of Parma University-Hospital, usually with different specialty background, and equipped with portable ultrasound, set of drugs and devices useful in urgency. The MMU visits patients in nursing homes, with the mission of stabilizing clinical conditions and avoiding hospital admission. The residents of the other two nursing homes will receive usual care, i.e. ED referral in every case of urgency. Study endpoints include unplanned hospital admissions (primary), crude all-cause mortality, hospital mortality, length of stay and healthcare-related costs (secondary).

**Ethics and dissemination-** The study protocol was approved by the Ethics Committee of Area Vasta Emilia Nord. Informed consent will be collected from patients or their legal representatives. The results will be actively disseminated through peer-reviewed journals and conference presentations, in compliance with the Italian law.

**Registration ID-** ClinicalTrials.gov NCT 04085679

**Key words:** multimorbidity; geriatrics; hospitalization; multidisciplinary care; hospital-community partnership

**STRENGTHS AND LIMITATIONS OF THIS STUDY**

- ✓ This study will explore the effectiveness of a complex intervention focused on the avoidance of hospital admissions for nursing home residents, with a strong hospital-community partnership.
- ✓ The study intervention consists in bringing specialist hospital care directly at the bedside of nursing home residents, an innovative approach not previously described in the scientific literature.
- ✓ The intervention has been developed considering the organization of Italian healthcare system, but is reproducible and applicable in other settings.
- ✓ Due to ethical concerns and complex nature of the intervention, randomization of participants is not possible.

For peer review only

## INTRODUCTION

The increasing clinical complexity of older medical patients in industrialized countries, due to multimorbidity, polypharmacy, frailty, disability and social hardship, is challenging for health care systems.<sup>1 2</sup> Firstly, these patients are often admitted to Emergency Departments (EDs), accounting for 12 to 24% of all ED visits.<sup>3</sup> However, their complex needs are often poorly met in this setting, where the busy, overcrowded environment does not always allow a careful evaluation of the multi-faceted clinical problems of elderly patients.<sup>4-6</sup> These difficulties not only contribute to ED overcrowding, but they may also lead to inaccurate diagnoses and unrecognized or untreated health problems.<sup>7</sup> Older patients furthermore have an up to 5-times-higher risk of ward admission, irrespective of the severity of the clinical problem.<sup>3 5 8</sup> Once admitted, they are far more likely to stay in hospital for more than two weeks<sup>6</sup> and are at much greater risk of experiencing complications related to hospital admission.<sup>9</sup>

These issues are especially relevant for residents of nursing homes, who exhibit a particularly high risk of hospitalization (greater than 20% per year)<sup>10</sup> and are at high risk of complications during hospitalization, due to frailty, multimorbidity and the possible presence of cognitive impairment.

In the light of these considerations, a number of approaches have been developed designed to reduce the risk of hospitalization in nursing home residents. These are summarized in the very recent systematic review by Santosaputri et al,<sup>11</sup> which includes quantitative comparative studies of all designs aiming to determine the efficacy of interventions provided by a health professional specializing in geriatric medicine. Sixteen studies were eligible, of which 6 randomized controlled trials, involving an estimated total of over 7400 patients. The authors of the review categorized 14 intervention programs into three primary approaches (two did not fit in any category):

- Prevention approach (nine studies): Interventions applied in the nursing home to prevent hospitalization of residents, in most cases involving care provided by nurses, physicians, and sometimes allied health personnel. The majority of interventions involved either direct review of patients, telephone (or telemedicine) support, or comprehensive geriatric assessment.
- Emergency department-based hospital avoidance (three studies): interventions targeting nursing home residents presenting to the ED to facilitate early discharge and avoid hospitalization. Programs of this type involved care provided by nursing staff (e.g. intravenous therapy, wound care, catheter management).



- 1 - Post-hospital supported discharge (two studies): Interventions designed to support residents following  
2 hospital admission. One of the studies evaluated the efficacy of geriatrician and nurse review in the  
3 facility and the development of a comprehensive tailored care plan following hospital admission; the  
4 other assessed the efficacy of a tailor-made intervention compared to a standardized rehabilitation  
5 program following admission due to hip fracture.  
6  
7  
8  
9

10 Although the majority of the studies reported reductions in hospitalizations (in the form of either ED  
11 presentations or hospital admissions), only six obtained statistically significant findings, of which none were  
12 RCTs. Unfortunately, the quality of evidence was considered low to moderate, therefore the authors emphasize  
13 the need for further, well-designed studies to identify which interventions are effective in reducing  
14 hospitalization in the older residents.  
15

16 At our institution, different projects have been carried out for many years to improve care of the elderly,  
17 primarily targeting hospital organization, with the main objective to reduce unnecessary, avoidable length of  
18 stay (LOS).<sup>12-14</sup> These efforts benefit in-hospital patients, but are not designed to prevent hospitalizations.  
19 Based on literature evidence, and drawing on our long-time experience with elderly care, we hypothesize that  
20 a complex intervention delivered in nursing homes, where vulnerable high-risk patients live, involving direct  
21 patient care by hospital medical staff with geriatric expertise, may reduce hospitalization of residents.  
22  
23  
24  
25  
26  
27  
28  
29  
30  
31  
32  
33  
34  
35  
36  
37  
38

## 39 **METHODS AND ANALYSIS**

### 40 **Study setting**

41 The study is based in the University Hospital of Parma, which has a catchment area of more than 400,000  
42 inhabitants, of whom 22.3% is over 65 years old. It provides the only Emergency service of the district, and it  
43 ranks fourth in Italy by number of ED visits (yearly average of over 110,000). The average admission rate of  
44 the adult ED population is 18%, of which 65% concern people older than 65.  
45  
46  
47  
48  
49

50 In the last two decades, the University Hospital of Parma has implemented several innovative initiatives to  
51 manage the hospital flow of frail multimorbid patients and their complex needs. These initiatives included bed  
52 management to avoid “bed-blockers”,<sup>12</sup> physician accountability for the discharge process,<sup>13</sup> and creation of a  
53 dedicated hospital unit, organized by intensity of care to anticipate the needs of these patients preserving high  
54 performance indices.<sup>14</sup> This unit, called Internal Medicine and Critical Subacute Care Unit, performs over  
55  
56  
57  
58  
59  
60

1 3,500 urgent admissions of frail multimorbid elderly patients per year, with an average length of stay that in  
2  
3 30% of cases is lower than 3 days.<sup>14</sup>  
4

5 Nursing homes participating to the study are public facilities which ensure the presence of nursing staff 24  
6  
7 hours a day and of a physician at least 4 hours a day (high-intensity care facilities). The possible role of distance  
8  
9 to the hospital is considered by including in each group one nursing home located next to the hospital and one  
10  
11 located >5 km of distance.  
12

13  
14 The participating nursing homes are the following:  
15

- 16 - C.R.A. “I Tigli” C/O Comprensorio di Villa Parma, Piazzale Fiume 5, Parma (intervention group)
- 17
- 18 - C.R.A. “Casa degli Anziani”, Via Aldo Moro 2, Collecchio (intervention group)
- 19
- 20 - C.R.A. “Le Tamerici” C/O Comprensorio di Villa Parma, Piazzale Fiume 5, Parma (control group)
- 21
- 22 - C.R.A. “Ines Ubaldi”, Via Ravenna 4, Parma (control group)
- 23

24 This study follows a multimethod approach, based on the MRC framework for developing and evaluating  
25  
26 complex interventions,<sup>15</sup> including the development, feasibility assessment, and evaluation phases.  
27  
28  
29

### 30 **Development of the intervention**

31  
32 First, the different types of approaches reported in the literature, described above, were considered. The  
33  
34 “prevention approach”, interventions conducted in nursing homes, was chosen as the most suitable strategy to  
35  
36 integrate the hospital’s organizational model already in place, as it can target both hospitalization rates and ED  
37  
38 overcrowding, allowing to intervene before the person accesses the hospital.  
39

40 Available evidence also prompted us to opt for a multicomponent approach. In fact, data from qualitative  
41  
42 interviews reveal that the decision to transfer residents to hospital may be influenced by different factors, such  
43  
44 as staffing and skill mix in the nursing homes, treatment options available in the facility, end-of-life  
45  
46 decision-making, and communication and bureaucratic requirements. This multifactorial association means  
47  
48 that a multicomponent intervention is likely to be more effective than a single-component intervention.<sup>16</sup>  
49

50 The choice of employing a mobile geriatric specialist service was supported by the positive results obtained  
51  
52 by the two controlled studies which examined similar interventions.<sup>17 18</sup> Schippinger et al evaluated a service  
53  
54 where a physician did regular and on-call visits intended to provide services otherwise associated with  
55  
56 hospitalization.<sup>17</sup> Díaz-Gegúndez et al evaluated an ambulant team with a nurse and a physician, doing  
57  
58 comprehensive geriatric assessments of residents as well as reviewing medications and providing support to  
59  
60

1 staff.<sup>18</sup> Our intervention does not involve a nurse, unlike the Díaz-Gegúndez study, because in the participating  
2 facilities nursing staff is available 24 hours a day. Unlike the experience of Schippinger et al, moreover, we  
3 chose not to perform periodic visits on site, since routine clinical management and scheduled follow-up is  
4 already performed by nursing home physicians.  
5

6  
7  
8  
9  
10 Finally, medical hospital staff was preferred to community geriatricians, on the assumption that older patients  
11 may feel more comfortable being handled by physicians who may have already cared for them at the hospital.  
12 Moreover, hospital staff enables direct patient referral to the ward. Finally, this allows the use of diagnostic  
13 technologies available at the hospital, which can be used immediately without the need for hospital admission.  
14  
15  
16  
17  
18  
19

### 20 **Description of the intervention**

21  
22 The model hinges on the strong collaboration between hospital and nursing home staff to provide residents  
23 with patient-centered care. It entails a multicomponent intervention which is integrated in standard care and  
24 comprises three steps: 1) MMU team activation, 2) on site visit by a team of physicians with geriatric expertise,  
25 3) interdisciplinary care planning (Figure 1).  
26  
27  
28  
29  
30  
31  
32

#### 33 *Step 1: MMU team activation*

34 Patient selection is necessary to ensure that available resources are used for patients who may really benefit.  
35 To this end, the nursing home physician contacts by phone the “flow manager”, a skilled internist with strong  
36 clinical expertise, organizational attitude and managerial training, during the 8 a.m.-6 p.m. time frame, Monday  
37 to Friday. The phone consultation is reported on a form containing the description of the patient’s clinical  
38 condition and a summary of the conversation. The form also indicates which decision was reached among the  
39 following 6 not mutually exclusive options:  
40  
41  
42  
43  
44  
45  
46

- 47 a) The patient can be managed by nursing home staff, therapeutic advice is provided by phone
- 48 b) Remote reassessment is scheduled after a number of hours agreed upon by the team
- 49 c) The MMU team is dispatched for evaluation, treatment and stabilization on site
- 50 d) A significant change in vital parameters is observed which requires immediate activation of emergency  
51 services
- 52 e) Direct hospital admission is considered necessary
- 53 f) Ambulatory outpatient visits or tests are planned
- 54
- 55
- 56
- 57
- 58
- 59
- 60

1  
2  
3  
4 *Step 2: on site visit by a team of physicians with geriatric expertise*

5  
6 Visits at the nursing home are performed by two members of the MMU team: an expert hospital physician  
7  
8 chosen on a case-by-case basis among the clinical staff of the Internal Medicine and Critical Subacute Care  
9  
10 Unit, which comprises internists, gastroenterologists, geriatricians, specialists in clinical nutrition, depending  
11  
12 on the disease or clinical problem that must be treated, and a specifically trained resident in Emergency  
13  
14 Medicine.

15  
16 The team is provided with a car to reach the nursing homes, a portable ultrasound system, and an essential set  
17  
18 of drugs and medical devices useful in an emergency setting. The ultrasound system is equipped with three  
19  
20 probes (convex, linear, and phased-array) for performing thoraco-pulmonary, cardiac, vascular, abdominal and  
21  
22 soft tissue ultrasound, when required. Available drugs include those that can be administered intravenously for  
23  
24 treating urgent conditions (e.g. loop diuretics, steroids, fluids, antibiotics). Devices include central and  
25  
26 peripheral venous lines, naso-gastric and rectal tubes and bladder catheters. Blood tests can also be performed.  
27  
28 Table 1 shows possible clinical scenarios which may require MMU team activation, and possible decisions.

29  
30  
31  
32  
33 *Step 3: interdisciplinary care planning*

34  
35 Based on the results of the visit and of any performed investigations, the MMU team formulates personalized  
36  
37 advice and referrals, and discusses these with the nursing home physician. If stabilization on site is not deemed  
38  
39 possible, the MMU team plans a direct admission to the Internal Medicine and Critical Subacute Care Unit,  
40  
41 thus avoiding ED access. The planning and the final outcome of the intervention are recorded in the second  
42  
43 part of the form.

44  
45  
46  
47 **Feasibility assessment**

48  
49 A pilot phase of 5 months (December 2018-April 2019) was conducted in two nursing homes in order to look  
50  
51 at feasibility of the MMU care Model described above. Before the intervention was introduced, meetings were  
52  
53 held with nursing home staff to agree on activation modalities.

54  
55 In this period, 99 phone calls were received, of which 84 required MMU team onsite visits, and 15 were  
56  
57 managed with remote consultancy. Of the latter, 3 required direct admission after remote phone consultancy.  
58  
59  
60

1 Only 4 of the 84 patients visited onsite required direct admission. One patient was sent to the ED for massive  
2 intestinal bleeding (Figure 2).  
3

4 This phase demonstrated the feasibility of the intervention, and did not highlight any need for modifications.  
5  
6  
7  
8

## 9 **Evaluation phase**

### 10 *Aim and objectives*

11 The study aim is to verify the effects of the implementation of the MMU care model tested in the pilot phase.  
12  
13 Primary objective is to verify reduction of unplanned hospitalization rates in the nursing homes of the  
14 intervention group compared to the nursing homes in the control group. Secondary objectives are to measure  
15 the effects of the intervention in terms of mortality, health service use, and costs.  
16  
17  
18  
19  
20  
21  
22

### 23 *Study Design*

24 This study is a prospective, pragmatic, multicenter, quasi-experimental study (sequential design with two  
25 cohorts), in which usual nursing home care is compared to care provided by applying the MMU model.  
26  
27  
28  
29  
30  
31  
32

### 33 *Study Population*

34 All residents of the participating nursing homes are eligible, regardless of their clinical status. Residents who  
35 do not provide informed consent will be excluded.  
36  
37  
38  
39  
40

### 41 *Usual Care*

42 Patients in the control cohort receive usual care, which means the actions to take are decided by the nursing  
43 home staff. Generally, this implies that patients who are clinically unstable, or require urgent instrumental  
44 tests, will be sent to the ED.  
45  
46  
47  
48  
49  
50

### 51 *Measures: Baseline variables*

52 Demographic data on gender and age are collected by chart review.  
53  
54  
55  
56  
57

### 58 *Measures: Outcome variables*

59  
60

1 The primary outcome is hospitalization rate, considering at the numerator all unplanned admissions occurred  
2 during a 1-year period, and at the denominator the sum of the person-time of the at risk population (days of  
3 stay at the nursing home). For the intervention group, the numerator corresponds to options d) and e) defined  
4 in “Step 1: MMU team activation”.

5  
6  
7  
8  
9 The secondary outcomes are the following:

- 10 - Crude all-cause Death Rate (CDR): the number of deaths *during a* 1-year period on person-time of the  
11 at risk population
- 12 - Hospital Mortality rate: the frequency of patients who die while in the hospital (death rate/1000)
- 13 - Length of stay (LOS): the duration of a single episode of hospitalization. Inpatient days are calculated  
14 by subtracting day of admission from day of discharge.
- 15 - Adverse events or complications: frequency of events occurred within 48 hours from MMU team  
16 activation and subsequent patient stabilization, for which hospital access becomes necessary.
- 17 - Costs analysis, comparing the cost differences in the two groups

### 30 31 *Data Collection*

32 Patient demographic and clinical characteristics are collected at baseline to describe the study population and  
33 determine factors associated with hospital rate. Participants’ files and electronic data are stored securely at the  
34 study site (e.g. locked area, password protected hard- and software). Data integrity will be scrutinized with  
35 several strategies (e.g. valid values, range checks, consistency checks). Patient data are only identifiable with  
36 the unique participant’s number. Personal information will be collected and saved in a separate file (on a  
37 different server) which can only be accessed by the Principal Investigator (PI). This information will be used  
38 by the PI to retrieve data on any hospital admissions (length of stay, in-hospital death ...) from administrative  
39 databases (discharge summaries, ED data, Death Registry). Residents’ identification data will be deleted once  
40 the study is completed, making the dataset anonymous. All study protocol authors will have access to the  
41 anonymous dataset.

### 52 53 54 55 56 *Cost analysis*

57 We will identify the changes in net costs associated with one-year exposure to the intervention, consisting in  
58 the induced costs due to incremental resource inputs for carrying out the intervention and hospital health  
59  
60

1 service utilization costs. Staffing costs will be calculated considering the time spent by the professionals  
2 involved in the intervention. Non-staff running costs include expenses of MMU staff travelling to and from  
3 the nursing home. The health service utilization costs will be identified based on the Diagnosis Related Group  
4 (DRG) system.  
5  
6  
7  
8  
9

### 10 11 *Study duration*

12 Overall expected duration is 18 months, with study initiation presumably in November 2019 and completion  
13 in April 2021.  
14  
15  
16  
17

### 18 19 **Statistical Methodology**

#### 20 21 *Sample size calculation*

22 The number of subjects to include was estimated using the findings of Diaz-Gegundez et al [Diaz 2011], who  
23 performed a large quasi-experimental trial. Thus, considering 56 cases vs 32 cases per 100 residents, and using  
24 a 2-sided, large-samples z-test of the Poisson incidence rate difference at a significance level of 0.05, and with  
25 a power of 0.90, overall 338 residents should be enrolled.  
26  
27  
28  
29  
30  
31  
32

#### 33 34 *Statistical analysis plan*

35 Descriptive statistics will be used to summarize patient populations and will be presented as means and  
36 standard deviations (SD) when normally distributed, or as medians and interquartile ranges (IQR).  
37  
38

39 For the primary analysis we will use Poisson regression with robust standard errors (SEs) to evaluate relative  
40 differences in hospital rates among our two cohorts while adjusting for demographic characteristics.  
41  
42

43 Concerning the secondary outcomes, the following analyses will be performed:  
44  
45

- 46 - Rates will be compared considering the quotient between the intervention and control groups
- 47 - A lognormal model will be used to compare in-hospital LOS.
- 48 - Chi square tests will be conducted for categorical data as adverse events or complications
- 49 - For costs, we will use the following equations to summarize the annual net costs associated with the  
50 implementation of the intervention. Any costs with negative values mean “savings” and any costs with  
51 positive values mean “losses”. Net costs = A (intervention costs) ± B (Costs for differences in hospital  
52 health service utilization) where: A= intervention: staffing costs+intervention: non- staff costs and B=  
53  
54  
55  
56  
57  
58  
59  
60

1 Costs for differences in inpatient care utilization. Therefore, the net costs arising from one-year  
2  
3 implementation of the intervention as compared with the current practice will be obtained, where a  
4  
5 negative value of net costs represents “cost-saving” and a positive value represents “not cost-saving”  
6

7 The demographic and clinical variables which influence the outcome with a p value<0.20 in the univariate  
8  
9 analysis will be included in the Poisson regression model.  
10

11 The analyses will be performed using SAS 8.2 (SAS Institute, Cary, NC, USA) and STATA-SE 11 (Stata Corp  
12  
13 LP, College Station, TX, USA).  
14  
15  
16  
17  
18  
19

## 20 **ETHICS AND DISSEMINATION**

21  
22 The study will be conducted in compliance with the principles of the revision of the Helsinki Declaration and  
23  
24 by current legislation on scientific research. The protocol and the patient informed consent form have been  
25  
26 approved by the competent Ethics Committee, in accordance with Italian current norms. The study protocol  
27  
28 has been registered on ClinicalTrials.gov (NCT 04085679).  
29

30 This study does not entail any experimental pharmacological treatment, or changes in the diagnostic-  
31  
32 therapeutic pathway. Eligible patients will be asked to give consent to handling of their personal data in writing.  
33  
34 The consent form will be dated and signed by the patient and by the investigator, authorized according to  
35  
36 norms of the local Ethics Committee.  
37  
38

39 A copy of the signed informed consent form shall be given to the patient, and the original shall be retained by  
40  
41 the investigator as part of the study documentation. Informed consent is required for all patients, also in the  
42  
43 control group. Informed consents are obtained by nursing home physicians, who are in charge of enrolment. In  
44  
45 the case of persons incapable of giving informed consent according to the investigator (such as patients with  
46  
47 dementia), consent will be sought from a legal representative.  
48

49 If a patient wishes to discontinue his/her participation in the study, it is the responsibility of the investigator to  
50  
51 ensure that no further data regarding the person’s health condition shall be collected. All collected data will be  
52  
53 used in the final analysis.  
54

55 All data collected, handled and stored for the purpose of this study will be kept confidential at any time and  
56  
57 will be securely stored, as required in GCP guidelines and in current privacy legislation. All data will be  
58  
59 gathered anonymously and handled by the project team in charge of analysis and management.  
60



1 The Promoter of the study is the University Hospital of Parma, which therefore maintains ownership of data.  
2  
3 The Research and Innovation Unit of the University Hospital of Parma is responsible for data management  
4 and statistical analysis. Findings will be published under the responsibility of the study's promoter. Authorship  
5 will be determined in compliance with International Committee of Medical Journal Editors (ICMJE)  
6 recommendations.  
7  
8  
9  
10  
11  
12  
13  
14  
15  
16  
17  
18  
19  
20  
21  
22  
23  
24  
25  
26  
27  
28  
29  
30  
31  
32  
33  
34  
35  
36  
37  
38  
39  
40  
41  
42  
43  
44  
45  
46  
47  
48  
49  
50  
51  
52  
53  
54  
55  
56  
57  
58  
59  
60

For peer review only

**Contributors**

A.N., B.P., S.L., P.M., E.B., M.F. and T.M. conceptualised the project and designed the intervention. F.D., A.T., P.S., F.P., B.S. and C.C. provided relevant contributions for study conception and design. E.I. gave statistical consult. A.N., C.C., F.D. and A.T. drafted the manuscript. All the authors read and approved the final manuscript.

**Funding**

This research received no specific grant from any funding agency in the public, commercial or not-for-profit sectors.

**Competing interests**

None declared.

**Patient consent**

Not required.

**Ethics approval**

The study was approved by the competent Ethics Committee (Comitato Etico Area Vasta Emilia Nord), under the ID 846/2019TOSS/AOUPR.

1  
2  
3  
4  
5  
6  
7  
8  
9  
10  
11  
12  
13  
14  
15  
16  
17  
18  
19  
20  
21  
22  
23  
24  
25  
26  
27  
28  
29  
30  
31  
32  
33  
34  
35  
36  
37  
38  
39  
40  
41  
42  
43  
44  
45  
46  
47  
48  
49  
50  
51  
52  
53  
54  
55  
56  
57  
58  
59  
60  
**REFERENCES**

1. Corazza GR, Formagnana P, Lenti MV. Bringing complexity into clinical practice: an internistic approach. *Eur J Intern Med* 2019;61:9-14.
2. Mannucci PM, Nobili A, Pasina L, *et al.* Polypharmacy in older people: lessons from 10 years of experience with the REPOSI register. *Intern Emerg Med* 2018;13(8):1191-200.
3. Samaras N, Chevalley T, Samaras D, *et al.* Older patients in the Emergency Department: a review. *Ann Emerg Med* 2010;56(3):261-9.
4. Aminzadeh F, Dalziel WB. Older adults in the emergency department: a systematic review of patterns of use, adverse outcomes, and effectiveness of interventions. *Ann Emerg Med* 2002;39(3):238-47.
5. Salvi F, Morichi V, Grilli A, *et al.* The elderly in the emergency department: a critical review of problems and solutions. *Intern Emerg Med* 2007;2(4):292-301.
6. Jay S, Whittaker P, Mcintosh J, *et al.* Can consultant geriatrician led comprehensive geriatric assessment in the emergency department reduce hospital admission rates? A systematic review. *Age Ageing* 2017;46(3):366-72.
7. Limpawattana P, Phungoen P, Mitsungnem T, *et al.* Atypical presentation of older adults at the emergency department and associated factors. *Arch Gerontol Geriatr* 2016;62:97-102.
8. Roberts DC, McKay MP, Shaffer A. Increasing rates of Emergency Department visits for elderly patients in the United States, 1993 to 2003. *Ann Emerg Med* 2008;51(6):769-74.
9. Buurman BM, Hoogerduijn JG, van Gemert EA, *et al.* Clinical characteristics and outcomes of hospitalized older patients with distinct risk profiles for functional decline: a prospective cohort study. *PLoS One* 2012;7(1):e29621.
10. Wyman JF, Hazzard WR. Preventing avoidable hospitalizations of nursing home residents: a multipronged approach to a perennial problem. *J Am Geriatr Soc* 2010;58(4):50-1.
11. Santosaputri E, Laver K, To T. Efficacy of interventions led by staff with geriatrics expertise in reducing hospitalisation in nursing home residents: A systematic review. *Australas J Ageing* 2019;38(1):5-14.
12. Meschi T, Nouvenne A, Maggio M, *et al.* Bed-blockers: an 8 year experience of clinical management. *Eur J Intern Med* 2012;23(2):e.73-e.74.

- 1  
2  
3  
4  
5  
6  
7  
8  
9  
10  
11  
12  
13  
14  
15  
16  
17  
18  
19  
20  
21  
22  
23  
24  
25  
26  
27  
28  
29  
30  
31  
32  
33  
34  
35  
36  
37  
38  
39  
40  
41  
42  
43  
44  
45  
46  
47  
48  
49  
50  
51  
52  
53  
54  
55  
56  
57  
58  
59  
60
13. Caminiti C, Meschi T, Braglia L, *et al.* Reducing unnecessary hospital days to improve quality of care through physician accountability: a cluster randomised trial. *BMC Health Serv Res* 2013;13:14.
14. Meschi T, Ticinesi A, Prati B, *et al.* A novel organizational model to face the challenge of multimorbid elderly patients in an internal medicine setting: a case study from Parma Hospital, Italy. *Intern Emerg Med* 2016;11(5):667-76.
15. Craig P, Dieppe P, Macintyre S, *et al.* Developing and evaluating complex interventions: the new Medical Research Council guidance. *BMJ* 2008;337:a1655.
16. Arendts G, Howard K. The interface between residential aged care and the emergency department: a systematic review. *Age Ageing* 2010;39:306-12.
17. Schippinger W, Hartinger G, Hierzer E, *et al.* Mobile geriatric consultant services for rest homes: study of the effects of consultations by internal medicine specialists in the medical care of rest home residents. *Z Gerontol Geriatr* 2012;45:735-41.
18. Diaz-Gegundez M, Paluzie G, Sanz-Ballester C, *et al.* Evaluation of an intervention program in nursing homes to reduce hospital attendance. *Rev Esp Geriatr Gerontol* 2011;46:261-4.

**TABLE 1**

Overview of possible expected clinical situations for which a Multidisciplinary Mobile Unit consultation may be activated, and possible management.

| Clinical situation                                                  | Clinical question                                                                                                                                                   | Mobile Unit Intervention                                                                                                                                          | Disposition                                                                                        |
|---------------------------------------------------------------------|---------------------------------------------------------------------------------------------------------------------------------------------------------------------|-------------------------------------------------------------------------------------------------------------------------------------------------------------------|----------------------------------------------------------------------------------------------------|
| Dyspnea of unknown origin                                           | Pulmonary? Cardiac? Embolism?<br>Other causes?                                                                                                                      | Chest and Abdomen Ultrasound. Arterial Gas sample, ECG, intravenous antibiotic administration                                                                     | Appropriate diagnosis and treatment on site. Immediate or scheduled admission whenever appropriate |
| Abdominal pain                                                      | Gallbladder stones? Cholecystitis?<br>Renal colic? Diverticular disease?<br>Urinary retention? Faecal impaction?<br>Peritonitis? Ascites?<br>Acute/subacute Hernia? | Abdomen ultrasound, basic blood tests, intravenous antibiotic administration                                                                                      | Appropriate diagnosis and treatment on site. Immediate or scheduled admission whenever appropriate |
| Hematuria                                                           | UTI? Catheter dysfunction? Bladder polyps? Stones?                                                                                                                  | Abdomen ultrasound, Bladder lavage, Catheter (re-)positioning, Intravenous antibiotic administration                                                              | Appropriate diagnosis and treatment on site. Immediate or scheduled admission whenever appropriate |
| Psychomotor agitation in previously stable dementia                 | Inadequate therapy? Emerging internistic problem? Other                                                                                                             | CGA, Neurogeriatric visit, exclusion of internistic-emerging problem, ECG, Thoracic&abdominal US                                                                  | Appropriate diagnosis and treatment on site.                                                       |
| Fever                                                               | Origin?                                                                                                                                                             | Thoracic&abdominal US, basic blood test                                                                                                                           | Excluding common differential diagnosis                                                            |
| Absence of peripheral veins for drugs or nutrients infusion         | How to find adequate venous access                                                                                                                                  | US guided Central venous catheter or PICC or peripheral access                                                                                                    | Securing patient                                                                                   |
| Monolateral leg edema                                               | DVT? Erysipelas? Trauma?                                                                                                                                            | Venous and soft tissues ultrasound                                                                                                                                | Appropriate diagnosis and treatment on site.                                                       |
| Terminal illness                                                    | Palliation strategy? How to get symptoms relief?                                                                                                                    | CGA. Multidisciplinary assessment. Positioning of drains (eg abdominal drainage for ascites). Interview with relatives / caregivers and GP for sharing strategies | Appropriate management.                                                                            |
| Ultrasound exam in a patient who can be transported with difficulty | GP's question                                                                                                                                                       | Abdominal, cardiac, arterial, thyroid, neck ultrasound                                                                                                            | Appropriate assessment                                                                             |

1  
2 ECG = Electrocardiogram; UTI = Urinary Tract Infection; CGA = Comprehensive Geriatric Assessment; US = Ultrasound; PICC = Peripherally-Inserted Central Venous  
3 Catheter; DVT = Deep Vein Thrombosis; GP = General Practitioner.  
4  
5  
6  
7  
8  
9  
10  
11  
12  
13  
14  
15  
16  
17  
18  
19  
20  
21  
22  
23  
24  
25  
26  
27  
28  
29  
30  
31  
32  
33  
34  
35  
36  
37  
38  
39  
40  
41  
42  
43  
44  
45  
46

For peer review only

1  
2  
3 **Figure 1. Description of the intervention of MMU Team**  
4  
5

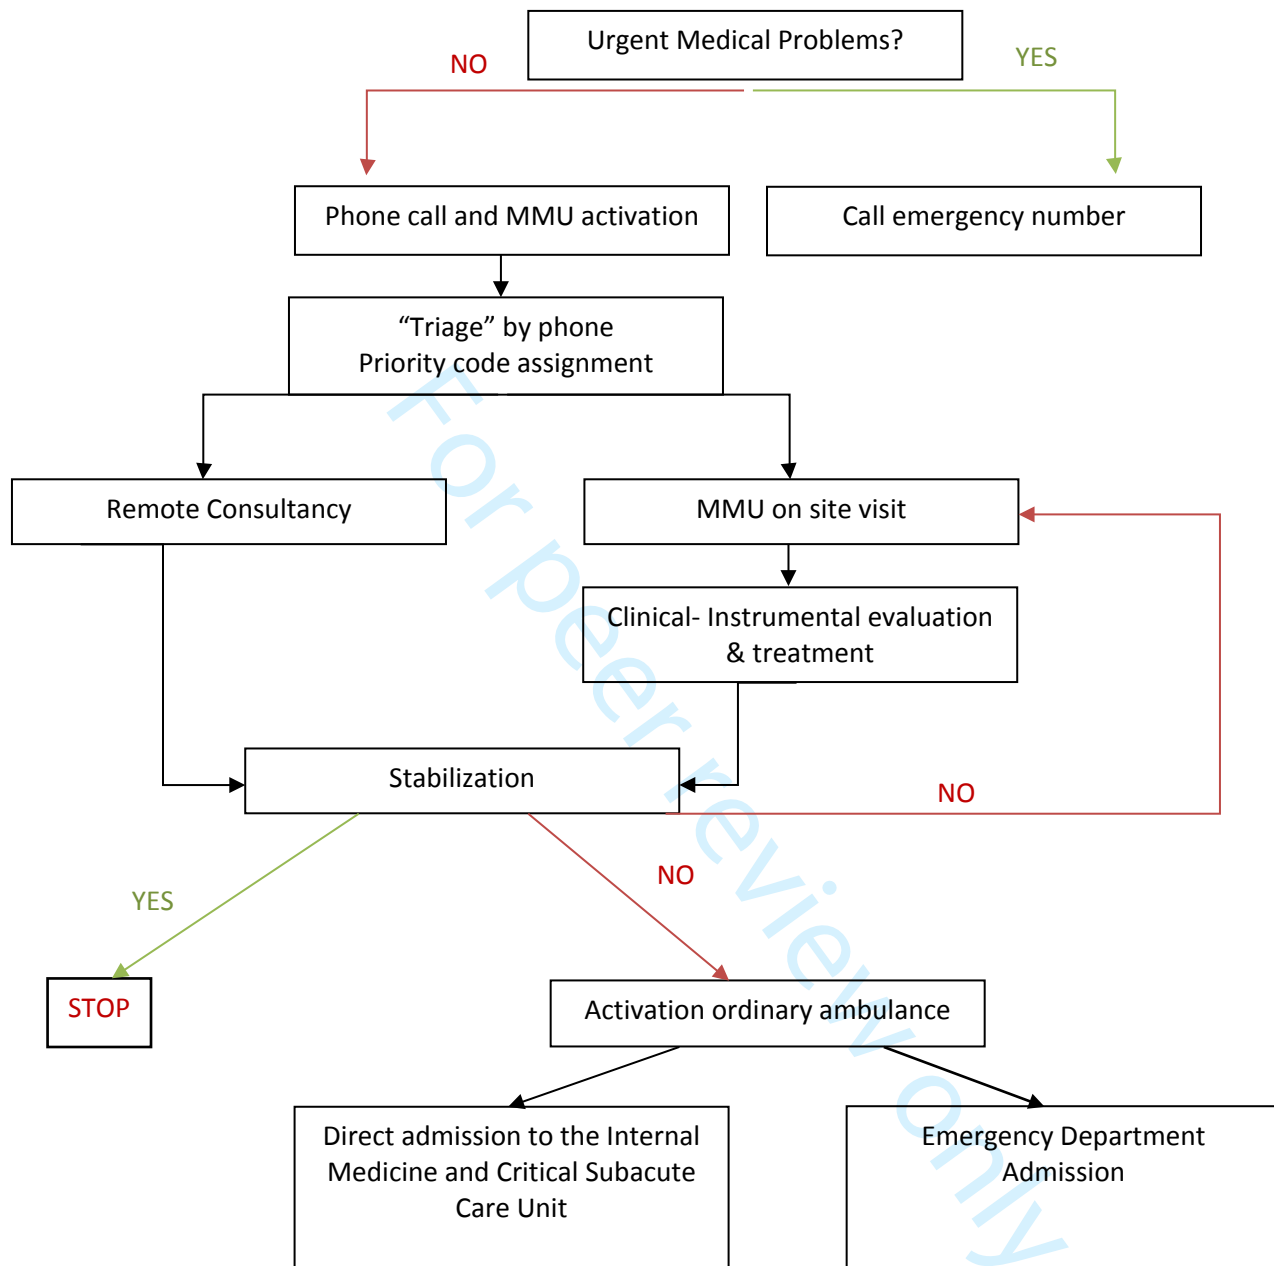

**Figure 2. Results of pilot phase**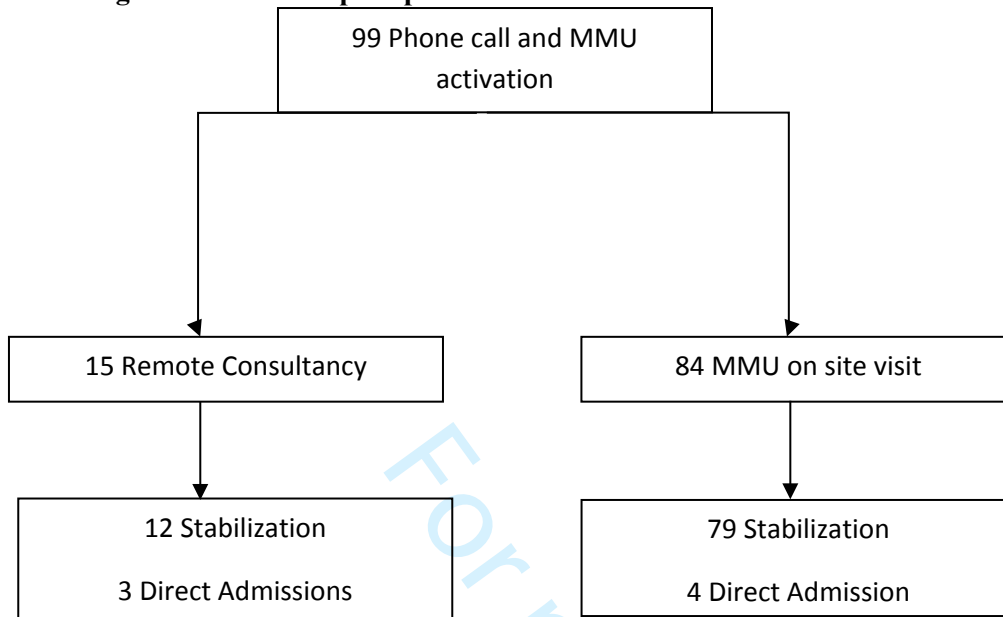



1  
2  
3  
4  
5  
6  
7  
8  
9  
10  
11  
12  
13  
14  
15  
16  
17  
18  
19  
20  
21  
22  
23  
24  
25  
26  
27  
28  
29  
30  
31  
32  
33  
34  
35  
36  
37  
38  
39  
40  
41  
42  
43  
44  
45  
46  
47  
48  
49  
50  
51  
52  
53  
54  
55  
56  
57  
58  
59  
60

For peer review only

1  
2  
3  
4  
5  
6  
7  
8  
9  
10  
11  
12  
13  
14  
15  
16  
17  
18  
19  
20  
21  
22  
23  
24  
25  
26  
27  
28  
29  
30  
31  
32  
33  
34  
35  
36  
37  
38  
39  
40  
41  
42  
43  
44  
45  
46

For peer review only

1  
2  
3  
4  
5  
6  
7  
8  
9  
10  
11  
12  
13  
14  
15  
16  
17  
18  
19  
20  
21  
22  
23  
24  
25  
26  
27  
28  
29  
30  
31  
32  
33  
34  
35  
36  
37  
38  
39  
40  
41  
42  
43  
44  
45  
46  
47  
48  
49  
50  
51  
52  
53  
54  
55  
56  
57  
58  
59  
60

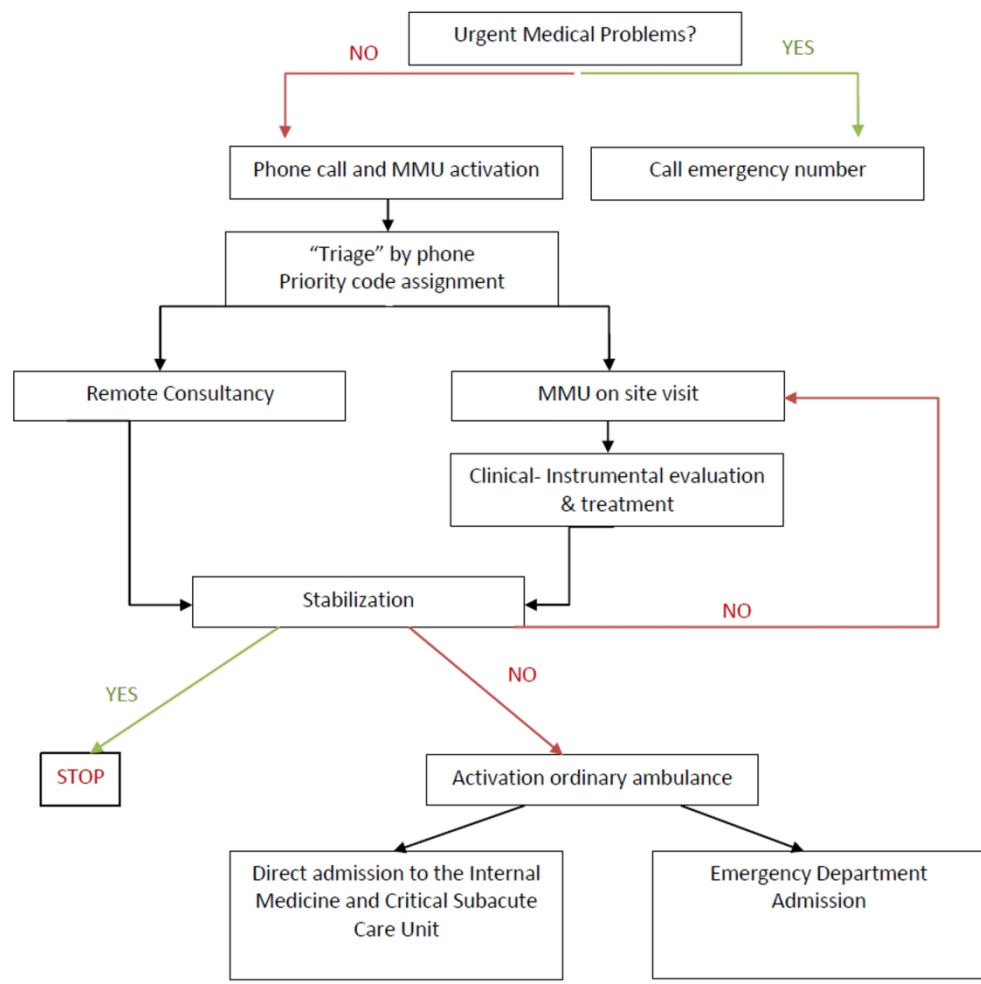

Description of the intervention of MMU Team

157x160mm (300 x 300 DPI)

1  
2  
3  
4  
5  
6  
7  
8  
9  
10  
11  
12  
13  
14  
15  
16  
17  
18  
19  
20  
21  
22  
23  
24  
25  
26  
27  
28  
29  
30  
31  
32  
33  
34  
35  
36  
37  
38  
39  
40  
41  
42  
43  
44  
45  
46  
47  
48  
49  
50  
51  
52  
53  
54  
55  
56  
57  
58  
59  
60

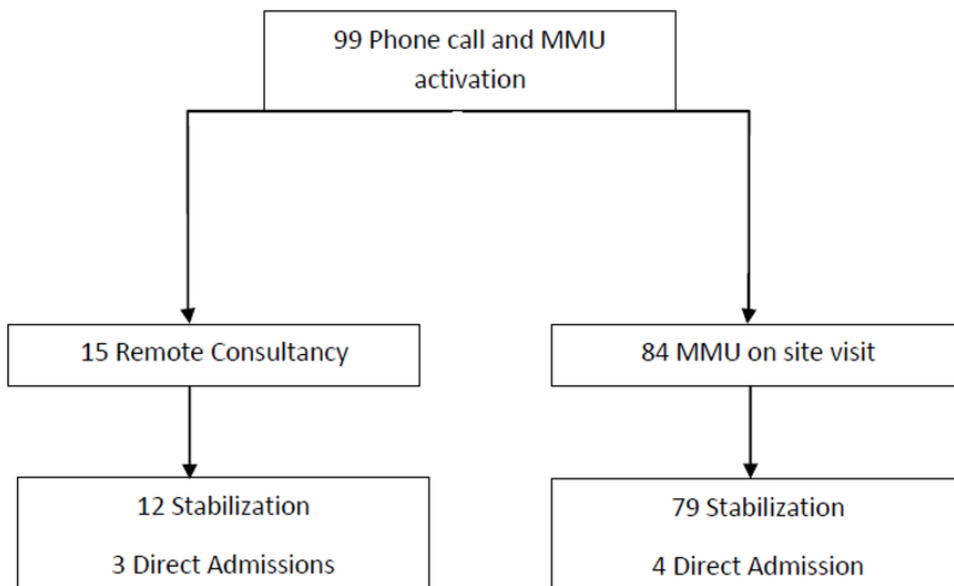

Results fo the pilot phase

76x44mm (300 x 300 DPI)

## MMU-1 STUDY PROTOCOL

### Implementation of a strategy to prevent hospital admission in nursing home residents: protocol of a quasi-experimental study

**Promoter:** Azienda Ospedaliero-Universitaria di Parma

**Principal Investigator:** Prof. Tiziana Meschi, U.O.C. Medicina Interna e Lungodegenza Critica, Dipartimento Medico-Geriatrico-Riabilitativo, Azienda Ospedaliero-Universitaria di Parma

**Protocol ID:** MMU-1

**Version:** n.2 of 2/10/2019

**ClinicalTrials.org ID:** NCT 04085679

## BACKGROUND

The increasing clinical complexity of older medical patients in industrialized countries, due to multimorbidity, polypharmacy, frailty, disability and social hardship, is challenging for health care systems [Corazza 2019, Mannucci 2018]. Firstly, these patients are often admitted to Emergency Departments (EDs), accounting for 12 to 24% of all ED visits [Samaras 2010]. However, their complex needs are often poorly met in this setting, where the busy, overcrowded environment does not always allow a careful evaluation of the multi-faceted clinical problems of elderly patients [Aminzadeh 2002, Salvi 2007, Jay 2017]. These difficulties not only contribute to ED overcrowding, but they may also lead to inaccurate diagnoses and unrecognized or untreated health problems [Limpawattana 2016]. Older patients furthermore have an up to 5-times-higher risk of ward admission, irrespective of the severity of the clinical problem [Samaras 2010, Salvi 2007, Roberts 2008]. Once admitted, they are far more likely to stay in hospital for more than two weeks [Jay 2017] and are at much greater risk of experiencing complications related to hospital admission [Buurman 2012].

These issues are especially relevant for residents of nursing homes, who exhibit a particularly high risk of hospitalization (greater than 20% per year [Wyman 2010]) and are at high risk of complications during hospitalization, due to frailty, multimorbidity and the possible presence of cognitive impairment.

In the light of these considerations, a number of approaches have been developed designed to reduce the risk of hospitalization in nursing home residents. These are summarized in the very recent systematic review by Santosaputri et al [Santosaputri 2019], which includes quantitative comparative studies of all designs aiming to determine the efficacy of interventions provided by a health professional specializing in geriatric medicine. 16 studies were eligible, of which 6 randomized controlled trials, involving an estimated total of over 7400 patients. The authors of the review categorized 14 intervention programs into three primary approaches (two did not fit in any category):

- Prevention approach (nine studies): Interventions applied in the nursing home to prevent hospitalization of residents, in most cases involving care provided by nurses, physicians, and sometimes allied health personnel. The majority of interventions involved either direct review of patients, telephone (or telemedicine) support, or comprehensive geriatric assessment.
- Emergency department-based hospital avoidance (three studies): interventions targeting nursing home residents presenting to the ED to facilitate early discharge and avoid hospitalization. Programs of this type involved care provided by nursing staff (e.g. intravenous therapy, wound care, catheter management).
- Post-hospital supported discharge (two studies): Interventions designed to support residents following hospital admission. One of the studies evaluated the efficacy of geriatrician and nurse review in the facility and the development of a comprehensive tailored care plan following hospital admission; the other assessed the efficacy of a tailor-made intervention compared to a standardized rehabilitation program following admission due to hip fracture.

Although the majority of the studies reported reductions in hospitalizations (in the form of either ED presentations or hospital admissions), only six obtained statistically significant findings, of which none were RCTs. Unfortunately, the quality of evidence was considered low to moderate, therefore the authors emphasize the need for further, well-designed studies to identify which interventions are effective in reducing hospitalization in the older residents. At our institution, for many years different projects have been carried out to improve care of the elderly, primarily targeting hospital organization, with the main objective to reduce unnecessary, avoidable length of stay (LOS) [Meschi 2012, Caminiti 2013, Meschi 2016]. These efforts benefit in-hospital patients, but are not designed to prevent hospitalizations. Based on literature evidence, and drawing on our long-time experience with elderly care, we hypothesize that a complex intervention delivered in nursing homes, where vulnerable high-risk patients live, involving direct patient care by hospital medical staff with geriatric expertise, may reduce hospitalization of residents.

## METHODS

The study is based in the University Hospital of Parma, which has a catchment area of more than 400,000 inhabitants, of whom 22.3% is over 65 years old. It provides the only Emergency service of the district, and it ranks fourth in Italy by number of ED visits (yearly average of over 110,000). The average admission rate of the adult ED population is 18%, of which 65% concern people older than 65.

In the last two decades, the University Hospital of Parma has implemented several innovative initiatives to manage the hospital flow of frail multimorbid patients and their complex needs. These initiatives included bed management to avoid “bed-blockers” [Meschi 2012], physician accountability for the discharge process [Caminiti 2013], and creation of a dedicated hospital unit, organized by intensity of care to anticipate the needs of these patients preserving high performance indices [Meschi 2016]. This unit, called Internal Medicine and Critical Subacute Care Unit, performs over 3,500 urgent admissions of frail multimorbid elderly patients per year, with an average length of stay that in 30% of cases is lower than 3 days [Meschi 2016].

Participating nursing homes are public facilities which ensure the presence of nursing staff 24 hours a day and of a physician at least 4 hours a day (high-intensity care facilities). The possible role of distance to the hospital is considered by including in each group one nursing home located next to the hospital and one located >5 km of distance.

The participating nursing homes are the following:

- C.R.A. “I Tigli” C/O Comprensorio di Villa Parma, Piazzale Fiume 5, Parma (intervention group)
- C.R.A. “Casa degli Anziani”, Via Aldo Moro 2, Collecchio (intervention group)
- C.R.A. “Le Tamerici” C/O Comprensorio di Villa Parma, Piazzale Fiume 5, Parma (control group)
- C.R.A. “Ines Ubaldi”, Via Ravenna 4, Parma (control group)

This study follows a multimethod approach, based on the MRC framework for developing and evaluating complex interventions [Craig 2008], including the development, feasibility assessment, and evaluation phases.

### 1. Development of the intervention

First, the different types of approaches reported in the literature, described above, were considered. The “prevention approach”, interventions conducted in nursing homes, was chosen as the most suitable strategy to integrate the hospital’s organizational model already in place, as it can target both hospitalization rates and ED overcrowding, allowing to intervene before the person accesses the hospital.

Available evidence also prompted us to opt for a multicomponent approach. In fact, data from qualitative interviews reveal that the decision to transfer residents to hospital may be influenced by different factors, such as staffing and skill mix in the nursing homes, treatment options available in the facility, end-of-life decision-making, and communication and bureaucratic requirements. This multifactorial association means that a multicomponent intervention is likely to be more effective than a single-component intervention [Arendts 2010].

The choice of employing a mobile geriatric specialist service was supported by the positive results obtained by the two controlled studies which examined similar interventions [Schippinger 2012, Diaz-Gegùndez 2011]. Schippinger et al [Schippinger 2012] evaluated a service where a physician did regular and on-call visits intended to provide services otherwise associated with hospitalization. Diaz-Gegùndez et al [Diaz-Gegùndez 2011] evaluated an ambulant team with a nurse and a physician, doing comprehensive geriatric assessments of residents as well as reviewing medications and providing support to staff. Our intervention does not involve a nurse, unlike the Diaz-Gegùndez study, because in the participating facilities nursing staff is available 24 hours a day. Unlike the experience of Schippinger et al, moreover, we chose not to perform periodic visits on site, since routine clinical management and scheduled follow-up is already performed by nursing home physicians.

Finally, medical hospital staff was preferred to community geriatricians, on the assumption that older patients may feel more comfortable being handled by physicians who may have already cared for them at the hospital. Moreover,

hospital staff enables direct patient referral to the ward. Finally, this allows the use of diagnostic technologies available at the hospital, which can be used immediately without the need for hospital admission.

### **The MMU care model intervention**

The model hinges on the strong collaboration between hospital and nursing home staff to provide residents with patient-centered care. It entails a multicomponent intervention which is integrated in standard care and comprises three steps: 1) MMU team activation, 2) on site visit by a team of physicians with geriatric expertise, 3) interdisciplinary care planning (Figure 1).

#### **Step 1: MMU team activation**

Patient selection is necessary to ensure that available resources are used for patients who may really benefit. To this end, the nursing home physician contacts by phone the “flow manager”, a skilled internist with strong clinical expertise, organizational attitude and managerial training, during the 8 a.m.-6 p.m. time frame, Monday to Friday. The phone consultation is reported on a form containing the description of the patient’s clinical condition and a summary of the conversation. The form also indicates which decision was reached among the following 6 not mutually exclusive options:

- a) The patient can be managed by nursing home staff, therapeutic advice is provided by phone
- b) Remote reassessment is scheduled after a number of hours agreed upon by the team
- c) The MMU team is dispatched for evaluation, treatment and stabilization on site
- d) A significant change in vital parameters is observed which requires immediate activation of emergency services
- e) Direct hospital admission is considered necessary
- f) Ambulatory outpatient visits or tests are planned

#### **Step 2: on site visit by a team of physicians with geriatric expertise**

Visits at the nursing home are performed by two members of the MMU team: an expert hospital physician chosen on a case-by-case basis among the clinical staff of the Internal Medicine and Critical Subacute Care Unit, which comprises internists, gastroenterologists, geriatricians, specialists in clinical nutrition, depending on the disease or clinical problem that must be treated, and a specifically trained resident in Emergency Medicine.

The team is provided with a car to reach the nursing homes, a portable ultrasound system, and an essential set of drugs and medical devices useful in an emergency setting. The ultrasound system is equipped with three probes (convex, linear, and phased-array) for performing thoraco-pulmonary, cardiac, vascular, abdominal and soft tissue ultrasound, when required. Available drugs include those that can be administered intravenously for treating urgent conditions (e.g. loop diuretics, steroids, fluids, antibiotics). Devices include central and peripheral venous lines, nasogastric and rectal tubes and bladder catheters. Blood tests can also be performed.

Table 1 shows possible clinical scenarios which may require MMU team activation, and possible decisions.

#### **Step 3: interdisciplinary care planning**

Based on the results of the visit and of any performed investigations, the MMU team formulates personalized advice and referrals, and discusses these with the nursing home physician. If stabilization on site is not deemed possible, the MMU team plans a direct admission to the Internal Medicine and Critical Subacute Care Unit, thus avoiding ED access. The planning and the final outcome of the intervention are recorded in the second part of the form.



## 2. Feasibility assessment

A pilot phase of 5 months (December 2018-April 2019) was conducted in two nursing homes in order to look at feasibility of the MMU care Model described above. Before the intervention was introduced, meetings were held with nursing home staff to agree on activation modalities.

In this period, 99 phone calls were received, of which 84 required MMU team onsite visits, and 15 were managed with remote consultancy. Of the latter, 3 required direct admission after remote phone consultancy. Only 4 of the 84 patients visited onsite required direct admission. One patient was sent to the ED for massive intestinal bleeding (Figure 2).

This phase demonstrated the feasibility of the intervention, and did not highlight any need for modifications.

## 3. Evaluation phase

### Aim and objectives

The study aim is to verify the effects of the implementation of the MMU care model tested in the pilot phase.

Primary objective is to verify reduction of unplanned hospitalization rates in the nursing homes of the intervention group compared to the nursing homes in the control group. Secondary objectives are to measure the effects of the intervention in terms of mortality, health service use, and costs.

### Study Design

This study is a prospective, pragmatic, multicenter, quasi-experimental study (sequential design with two cohorts), in which usual nursing home care is compared to care provided by applying the MMU model.

### Study Population

All residents of the participating nursing homes are eligible, regardless of their clinical status. Residents who do not provide informed consent will be excluded.

### Usual Care

Patients in the control cohort receive usual care, which means the actions to take are decided by the nursing home staff. Generally, this implies that patients who are clinically unstable, or require urgent instrumental tests, will be sent to the ED.

### Measures

#### *Baseline variables*

Demographic data on gender and age are collected by chart review.

#### *Outcome variables*

The primary outcome is hospitalization rate, considering at the numerator all unplanned admissions occurred during a 1-year period, and at the denominator the sum of the person-time of the at risk population (days of stay at the nursing home). For the intervention group, the numerator corresponds to options d) and e) defined in “Step 1: MMU team activation”.

#### Secondary outcomes:

- Crude all-cause Death Rate (CDR): the number of deaths *during a* 1-year period on person-time of the at risk population
- Hospital Mortality rate: the frequency of patients who die while in the hospital (death rate/1000)

- Length of stay (LOS): the duration of a single episode of hospitalization. Inpatient days are calculated by subtracting day of admission from day of discharge.
- Adverse events or complications: frequency of events occurred within 48 hours from MMU team activation and subsequent patient stabilization, for which hospital access becomes necessary.
- Costs analysis, comparing the cost differences in the two groups

## Data Collection

Patient demographic and clinical characteristics are collected at baseline to describe the study population and determine factors associated with hospital rate. Participants' files and electronic data are stored securely at the study site (e.g. locked area, password protected hard- and software). Data integrity will be scrutinized with several strategies (e.g. valid values, range checks, consistency checks). Patient data are only identifiable with the unique participant's number. Personal information will be collected and saved in a separate file (on a different server) which can only be accessed by the Principal Investigator (PI). This information will be used by the PI to retrieve data on any hospital admissions (length of stay, in-hospital death ...) from administrative databases (discharge summaries, ED data, Death Registry). Residents' identification data will be deleted once the study is completed, making the dataset anonymous. All study protocol authors will have access to the anonymous dataset.

### Cost analysis

We will identify the changes in net costs associated with one-year exposure to the intervention, consisting in the induced costs due to incremental resource inputs for carrying out the intervention and hospital health service utilization costs. Staffing costs will be calculated considering the time spent by the professionals involved in the intervention. Non-staff running costs include expenses of MMU staff travelling to and from the nursing home. The health service utilization costs will be identified based on the Diagnosis Related Group (DRG) system.

## Statistical Methodology

### Sample size calculation

The number of subjects to include was estimated using the findings of Diaz-Gegundez et al [Diaz 2011], who performed a large quasi-experimental trial. Thus, considering 56 cases vs 32 cases per 100 residents, and using a 2-sided, large-samples z-test of the Poisson incidence rate difference at a significance level of 0.05, and with a power of 0.90, overall 338 residents should be enrolled.

### Statistical analysis

Descriptive statistics will be used to summarize patient populations and will be presented as means and standard deviations (SD) when normally distributed, or as medians and interquartile ranges (IQR).

For the primary analysis we will use Poisson regression with robust standard errors (SEs) to evaluate relative differences in hospital rates among our two cohorts while adjusting for demographic characteristics.

Concerning the secondary outcomes, the following analyses will be performed:

- Rates will be compared considering the quotient between the intervention and control groups
- A lognormal model will be used to compare in-hospital LOS.
- Chi square tests will be conducted for categorical data as adverse events or complications
- For costs, we will use the following equations to summarize the annual net costs associated with the implementation of the intervention. Any costs with negative values mean "savings" and any costs with positive values mean "losses". Net costs = A... (intervention costs) + B (Costs for differences in hospital health service utilization) where: A= intervention: staffing costs+intervention: non- staff costs and B= Costs

for differences in inpatient care utilization. Therefore, the net costs arising from one-year implementation of the intervention as compared with the current practice will be obtained, where a negative value of net costs represents “cost-saving” and a positive value represents “not cost-saving”

The demographic and clinical variables which influence the outcome with a  $p$  value  $< 0.20$  in the univariate analysis will be included in the Poisson regression model.

The analyses will be performed using SAS 8.2 (SAS Institute, Cary, NC, USA) and STATA-SE 11 (Stata Corp LP, College Station, TX, USA).

## Data monitoring

Since this is a non-profit study promoted by the University Hospital of Parma, study monitoring is in charge of trained staff of the hospital’s Research and Innovation Unit, as set forth in current legislation (Ministerial Decrees 211/2003 and 15/11/2011).

## Ethical and regulatory aspects

The study will be conducted in compliance with the principles of the revision of the Helsinki Declaration and by current legislation on scientific research.

The protocol and the patient informed consent form will be submitted to the competent Ethics Committee for approval, in accordance with Italian current norms. The study will be initiated prior authorization from the legal representative of the center in which it is conducted.

## Informed consent

This study does not entail any experimental pharmacological treatment, or changes in the diagnostic-therapeutic pathway. Eligible patients will be asked to give consent to handling of their personal data in writing. The consent form will be dated and signed by the patient and by the investigator, authorized according to norms of the local Ethics Committee.

A copy of the signed informed consent form shall be given to the patient, and the original shall be retained by the investigator as part of the study documentation. Informed consent is required for all patients, also in the control group. Informed consents are obtained by nursing home physicians, who are in charge of enrolment. In the case of persons incapable of giving informed consent according to the investigator (such as patients with dementia), consent will be sought from a legal representative.

If a patient wishes to discontinue his/her participation in the study, it is the responsibility of the investigator to ensure that no further data regarding the person’s health condition shall be collected. All collected data will be used in the final analysis.

## Confidentiality

All data collected, handled and stored for the purpose of this study will be kept confidential at any time and will be securely stored, as required in GCP guidelines and in current privacy legislation. All data will be gathered anonymously and handled by the project team in charge of analysis and management.

1  
2  
3 Patients will only be identifiable by the clinical staff of the center where the patient was recruited. All data collected  
4 anonymously will be checked and analyzed at the Research and Innovation Unit of the University Hospital of Parma,  
5 responsible for the analysis and correct keeping of the archive.  
6  
7  
8  
9

## 10 **Study organization and responsibilities**

### 11 **Scientific Committee (SC)**

12 It performs overall study supervision and strategic control through periodic meetings, in which the coordination  
13 team informs the Committee on the project's progress, on any observed problems, and on possible solutions. It is  
14 responsible to decide whether a process should be halted or modified. It ensures that results are published on peer-  
15 reviewed journals within one year after study completion.  
16  
17  
18

### 19 **Principal Investigator (PI)**

20 The PI is responsible for the protection of patients' rights and for the integrity of the research. The PI must keep an  
21 updated list of appropriately qualified professionals, to whom he can delegate important activities relating to the  
22 study, and for whom he must provide the necessary training. The PI shall ensure that no deviations from the protocol  
23 occur, and that the protocol is not modified in any way without prior documented Ethics Committee review and  
24 approval. Before study initiation, the PI must obtain authorization from the Managing Director of the University  
25 Hospital of Parma to conduct the trial in compliance with the protocol.  
26  
27  
28

29 The PI must guarantee precision, completeness, readability and timeliness of data reported in the collection forms  
30 (CRFs) and in all required reports. Data reported in the eCRF, retrieved from original documents, must agree with  
31 those indicated in the reports; any discrepancies shall be verified and explained.  
32

33 The PI will prepare a folder (Investigator's File, IF) containing: all study documentation approved by the Ethics  
34 Committee, including amendments and minutes, signed agreements, curricula vitae of the PI and other  
35 investigators/delegates, register of enrolled subjects, list of subject identification codes.  
36

37 The PI is responsible for the retention of documents essential to the conduction of the clinical trial in the  
38 Investigator's Study File, for the time required by relevant legislation, and must adopt all necessary measures to  
39 prevent the accidental or premature destruction of these documents.  
40

41 At study completion, the PI shall immediately inform the institutions involved in the trial and the competent Ethics  
42 Committee, providing them a detailed report on conduction and results.  
43

### 44 **Clinical Investigators (CIs)**

45 They are the physicians comprising the MMU and those working in participating nursing homes. The latter perform  
46 patient screening and enrolment, and are in charge of the informed consent obtainment process. The informed  
47 consent must be acquired and documented in accordance with current applicable norms and must adhere to GCP  
48 and ethical principles rooted in the Helsinki Declaration. Patients shall be provided with exhaustive information on  
49 all aspects relating to the study, including modalities and duration, and collection of necessary data.  
50  
51

### 52 **Trial Statistician (TS)**

53 The TS develops the eCRF equipped with automatic checks and tracking of corrections made by the user and user  
54 identification, ensuring the presence of strictly necessary variables. The TS conducts statistical analyses required to  
55 verify study end points, after checking for data quality (quality assurance and quality control) and after defining the  
56 Statistical Analysis Plan (SAP). The TS prepares the tables and graphs needed to summarize and publish results, and  
57 contributes to the drafting of the paper, by providing indications concerning analysis interpretation, and the  
58 presence of any biases and methodological limitations.  
59  
60

## Retaining of original documents

The medical staff of the nursing homes shall retain the original copies of the informed consents, dated and signed by the patient and the physician. MMU medical staff will be responsible for storing the case report forms of each enrolled patient.

## Publication policy

The Promoter of the study is the University Hospital of Parma, which therefore maintains ownership of data. The Research and Innovation Unit is responsible for data management and statistical analysis. Findings will be published under the responsibility of the study's SC and prior verification of the Promoter (according to Ministerial Decree 17/12/2004).

Authorship will be determined by unanimous consensus of the SC, in compliance with International Committee of Medical Journal Editors (ICMJE) recommendations, which indicate the following four criteria:

1. Substantial contributions to the conception or design of the work; or the acquisition, analysis, or interpretation of data for the work; AND
2. Drafting the work or revising it critically for important intellectual content; AND
3. Final approval of the version to be published; AND
4. Agreement to be accountable for all aspects of the work in ensuring that questions related to the accuracy or integrity of any part of the work are appropriately investigated and resolved.

Individual researchers wishing to perform additional analyses to include in publications or conference presentations shall submit a request to the SC, for evaluation and authorization. A copy of any presentation, manuscript or abstract must be sent to the SC before dissemination.

## Protocol modifications

All amendments made to the protocol shall be submitted to the AVEN Ethics Committee. Amendments shall not be implemented without prior ethical approval. Modifications to the protocol which only concern administrative or logistical aspects of the study will need to be communicated to the Ethics Committee. Any violations of the protocol shall be reflected in the data reported in the eCRF and in the original documents, and original documents shall describe such violations, as well as the circumstances that made them necessary.

## Study duration

Overall expected duration is 18 months, with study initiation presumably in November 2019 and completion in April 2021.

## References

- Aminzadeh F, Dalziel WB. Older adults in the emergency department: a systematic review of patterns of use, adverse outcomes, and effectiveness of interventions. *Ann Emerg Med.* 2002; 39(3): 238-247.
- Arendts G, Howard K. The interface between residential aged care and the emergency department: a systematic review. *Age Ageing* 2010; 39: 306-312.
- Buurman BM, Hoogerduijn JG, van Gemert EA, de Haan RJ, Schuurmans MJ, de Rooij SE. Clinical characteristics and outcomes of hospitalized older patients with distinct risk profiles for functional decline: a prospective cohort study. *PLoS One* 2012; 7(1): e29621.

- 1  
2  
3  
4  
5  
6  
7  
8  
9  
10  
11  
12  
13  
14  
15  
16  
17  
18  
19  
20  
21  
22  
23  
24  
25  
26  
27  
28  
29  
30  
31  
32  
33  
34  
35  
36  
37  
38  
39  
40  
41  
42  
43  
44  
45  
46  
47  
48  
49  
50  
51  
52  
53  
54  
55  
56  
57  
58  
59  
60
- Caminiti C, Meschi T, Braglia L, Diodati F, Iezzi E, Marcomini B, et al. Reducing unnecessary hospital days to improve quality of care through physician accountability: a cluster randomised trial. *BMC Health Serv Res* 2013; 13: 14.
  - Corazza GR, Formagnana P, Lenti MV. Bringing complexity into clinical practice: an internistic approach. *Eur J Intern Med* 2019; 61: 9-14.
  - Craig P, Dieppe P, Macintyre S, Michie S, Nazareth I, Petticrew M. Developing and evaluating complex interventions: the new Medical Research Council guidance. *BMJ* 2008; 337: a1655.
  - Diaz-Gegundez M, Paluzie G, Sanz-Ballester C, Boada-Mejorana M, Terre-Ohme S, Ruiz-Poza D. Evaluation of an intervention program in nursing homes to reduce hospital attendance. *Rev Esp Geriatr Gerontol* 2011; 46: 261-264.
  - Jay S, Whittaker P, Mcintosh J, Hadden N. Can consultant geriatrician led comprehensive geriatric assessment in the emergency department reduce hospital admission rates? A systematic review. *Age Ageing* 2017; 46(3): 366-372.
  - Limpawattana P, Phungoen P, Mitsungnem T, Laosuangkoon W, Tansangworn N. Atypical presentation of older adults at the emergency department and associated factors. *Arch Gerontol Geriatr.* 2016; 62: 97-102.
  - Mannucci PM, Nobili A, Pasina L, REPOSI Collaborators. Polypharmacy in older people: lessons from 10 years of experience with the REPOSI register. *Intern Emerg Med* 2018; 13(8): 1191-1200.
  - Meschi T, Nouvenne A, Maggio M, Lauretani F, Borghi L. Bed-blockers: an 8 year experience of clinical management. *Eur J Intern Med* 2012; 23(2): e.73-e.74.
  - Meschi T, Ticinesi A, Prati B, Montali A, Ventura A, Nouvenne A, et al. A novel organizational model to face the challenge of multimorbid elderly patients in an internal medicine setting: a case study from Parma Hospital, Italy. *Intern Emerg Med* 2016; 11(5): 667-676.
  - Roberts DC, McKay MP, Shaffer A. Increasing rates of Emergency Department visits for elderly patients in the United States, 1993 to 2003. *Ann Emerg Med* 2008; 51(6): 769-774.
  - Salvi F, Morichi V, Grilli A, Giorgi R, De Tommaso G, Dessì-Fulgheri P. The elderly in the emergency department: a critical review of problems and solutions. *Intern Emerg Med.* 2007; 2(4): 292-301.
  - Samaras N, Chevalley T, Samaras D, Gold G. Older patients in the Emergency Department: a review. *Ann Emerg Med* 2010; 56(3): 261-269.
  - Santosaputri E, Laver K, To T. Efficacy of interventions led by staff with geriatrics expertise in reducing hospitalisation in nursing home residents: A systematic review. *Australas J Ageing* 2019; 38(1): 5-14.
  - Schippinger W, Hartinger G, Hierzer E, Osprian I, Bohnstingl M, Pilgram E. Mobile geriatric consultant services for rest homes: study of the effects of consultations by internal medicine specialists in the medical care of rest home residents. *Z Gerontol Geriatr* 2012; 45: 735-741.
  - Wyman JF, Hazzard WR. Preventing avoidable hospitalizations of nursing home residents: a multipronged approach to a perennial problem. *J Am Geriatr Soc.* 2010;58(4):50-51.



**TABLE 1**

Overview of possible expected clinical situations for which a Multidisciplinary Mobile Unit consultation may be activated, and possible management.

| Clinical situation                                          | Clinical question                                                                                                                                       | Mobile Unit Intervention                                                                         | Disposition                                                                                        |
|-------------------------------------------------------------|---------------------------------------------------------------------------------------------------------------------------------------------------------|--------------------------------------------------------------------------------------------------|----------------------------------------------------------------------------------------------------|
| Dyspnea of unknown origin                                   | Pulmonary? Cardiac? Embolism? Other causes?                                                                                                             | Chest and Abdomen Ultrasound. Arterial Gas sample, ECG                                           | Appropriate diagnosis and treatment on site. Immediate or scheduled admission whenever appropriate |
| Abdominal pain                                              | Gallbladder stones? Cholecystitis? Renal colic? Diverticular disease? Urinary retention? Faecal impaction? Peritonitis? Ascites? Acute/subacute Hernia? | Abdomen ultrasound, basic blood tests                                                            | Appropriate diagnosis and treatment on site. Immediate or scheduled admission whenever appropriate |
| Hematuria                                                   | UTI? Catheter dysfunction? Bladder polyps? Stones?                                                                                                      | Abdomen ultrasound, Bladder lavage, Catheter (re-)positioning                                    | Appropriate diagnosis and treatment on site. Immediate or scheduled admission whenever appropriate |
| Psychomotor agitation in previously stable dementia         | Inadequate therapy? Emerging internistic problem? Other                                                                                                 | CGA, Neurogeriatric visit, exclusion of internistic emerging problem, ECG, Thoracic&abdominal US | Appropriate diagnosis and treatment on site.                                                       |
| Fever                                                       | Origin?                                                                                                                                                 | Thoracic&abdominal US, basic blood test                                                          | Excluding common differential diagnosis                                                            |
| Absence of peripheral veins for drugs or nutrients infusion | How to find adequate venous access                                                                                                                      | US guided Central venous catheter or PICC or peripheral access                                   | Securing patient                                                                                   |
| Monolateral leg edema                                       | DVT? Erysipelas? Trauma?                                                                                                                                | Venous and soft tissues ultrasound                                                               | Appropriate diagnosis and treatment on site.                                                       |

|                                      |                                                                     |                                                  |                                                                                                                                                                   |                         |
|--------------------------------------|---------------------------------------------------------------------|--------------------------------------------------|-------------------------------------------------------------------------------------------------------------------------------------------------------------------|-------------------------|
| 1<br>2<br>3<br>4<br>5<br>6<br>7<br>8 | Terminal illness                                                    | Palliation strategy? How to get symptoms relief? | CGA. Multidisciplinary assessment. Positioning of drains (eg abdominal drainage for ascites). Interview with relatives / caregivers and GP for sharing strategies | Appropriate management. |
| 9<br>10<br>11<br>12<br>13<br>14      | Ultrasound exam in a patient who can be transported with difficulty | GP's question                                    | Abdominal, cardiac, arterial, thyroid, neck ultrasound                                                                                                            | Appropriate assessment  |

15 ECG = Electrocardiogram; UTI = Urinary Tract Infection; CGA = Comprehensive Geriatric Assessment; US = Ultrasound; PICC = Peripherally-Inserted Central Venous Catheter;  
 16 DVT = Deep Vein Thrombosis; GP = General Practitioner.  
 17  
 18  
 19  
 20  
 21  
 22  
 23  
 24  
 25  
 26  
 27  
 28  
 29  
 30  
 31  
 32  
 33  
 34  
 35  
 36  
 37  
 38  
 39  
 40

For peer review only

1  
2  
3  
4  
5  
6  
7  
8  
9  
10  
11  
12  
13  
14  
15  
16  
17  
18  
19  
20  
21  
22  
23  
24  
25  
26  
27  
28  
29  
30  
31  
32  
33  
34  
35  
36  
37  
38  
39  
40  
41  
42  
43  
44  
45  
46



Figure 1. Description of the intervention of MMU Team

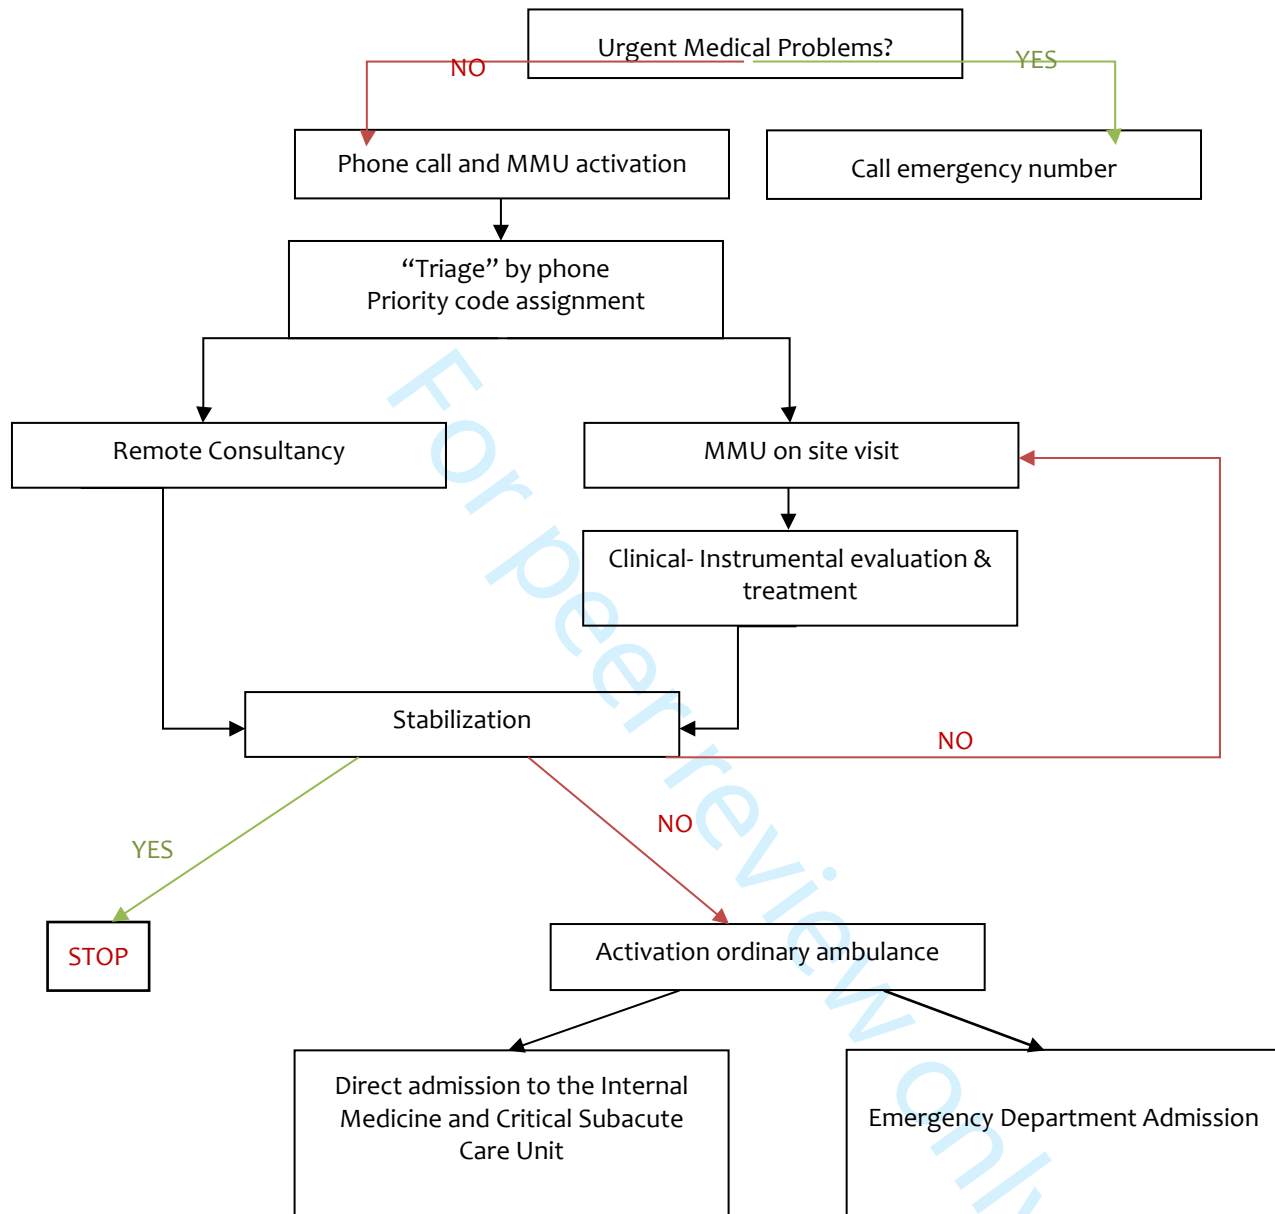

Figure 2. Results of pilot phase

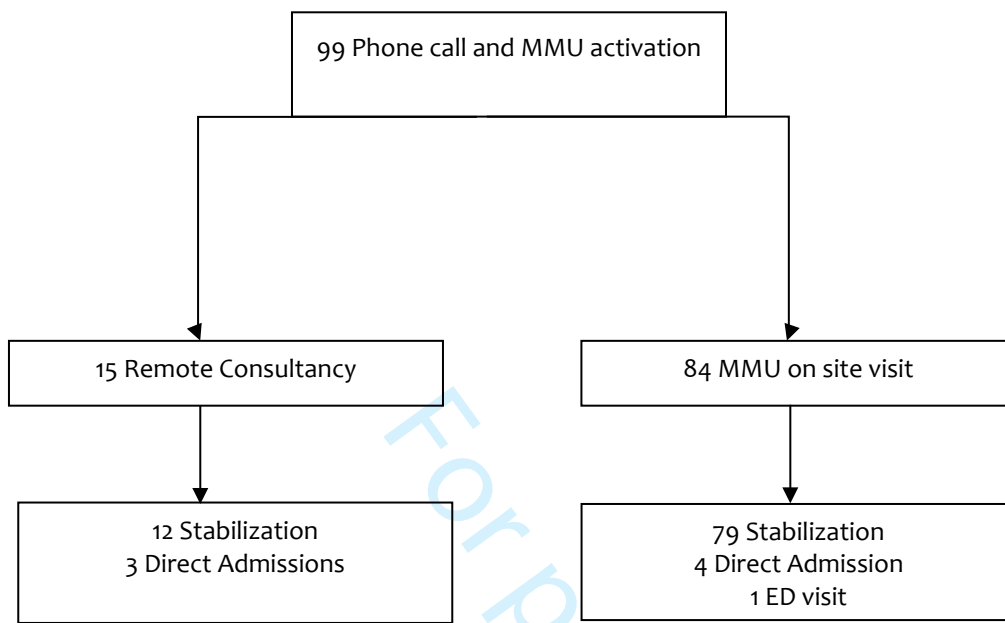

For peer review only

1  
2  
3  
4  
5  
6  
7  
8  
9  
10  
11  
12  
13  
14  
15  
16  
17  
18  
19  
20  
21  
22  
23  
24  
25  
26  
27  
28  
29  
30  
31  
32  
33  
34  
35  
36  
37  
38  
39  
40  
41  
42  
43  
44  
45  
46  
47  
48  
49  
50  
51  
52  
53  
54  
55  
56  
57  
58  
59  
60

Parma, 25/7/2019

Undersigned,

The Principal Investigator  
Prof. Tiziana Meschi

For peer review only

# Reporting checklist for protocol of a clinical trial.

Based on the SPIRIT guidelines.

## Instructions to authors

Complete this checklist by entering the page numbers from your manuscript where readers will find each of the items listed below.

Your article may not currently address all the items on the checklist. Please modify your text to include the missing information. If you are certain that an item does not apply, please write "n/a" and provide a short explanation.

Upload your completed checklist as an extra file when you submit to a journal.

In your methods section, say that you used the SPIRIT reporting guidelines, and cite them as:

Chan A-W, Tetzlaff JM, Altman DG, Laupacis A, Gøtzsche PC, Krleža-Jerić K, Hróbjartsson A, Mann H, Dickersin K, Berlin J, Doré C, Parulekar W, Summerskill W, Groves T, Schulz K, Sox H, Rockhold FW, Rennie D, Moher D. SPIRIT 2013 Statement: Defining standard protocol items for clinical trials. *Ann Intern Med.* 2013;158(3):200-207

|                                   | Reporting Item                                                                                                                  | Page Number |
|-----------------------------------|---------------------------------------------------------------------------------------------------------------------------------|-------------|
| <b>Administrative information</b> |                                                                                                                                 |             |
| Title                             | <a href="#">#1</a> Descriptive title identifying the study design, population, interventions, and, if applicable, trial acronym | 1           |

|    |                     |                     |                                                    |                    |
|----|---------------------|---------------------|----------------------------------------------------|--------------------|
| 1  | Trial registration  | <a href="#">#2a</a> | Trial identifier and registry name. If not yet     | 2, end of abstract |
| 2  |                     |                     | registered, name of intended registry              |                    |
| 3  |                     |                     |                                                    |                    |
| 4  |                     |                     |                                                    |                    |
| 5  |                     |                     |                                                    |                    |
| 6  | Trial registration: | <a href="#">#2b</a> | All items from the World Health Organization       | 2                  |
| 7  |                     |                     |                                                    |                    |
| 8  | data set            |                     | Trial Registration Data Set                        |                    |
| 9  |                     |                     |                                                    |                    |
| 10 |                     |                     |                                                    |                    |
| 11 |                     |                     |                                                    |                    |
| 12 | Protocol version    | <a href="#">#3</a>  | Date and version identifier                        | Supplemental       |
| 13 |                     |                     |                                                    |                    |
| 14 |                     |                     |                                                    | Material           |
| 15 |                     |                     |                                                    |                    |
| 16 |                     |                     |                                                    |                    |
| 17 | Funding             | <a href="#">#4</a>  | Sources and types of financial, material, and      | 14                 |
| 18 |                     |                     | other support                                      |                    |
| 19 |                     |                     |                                                    |                    |
| 20 |                     |                     |                                                    |                    |
| 21 |                     |                     |                                                    |                    |
| 22 |                     |                     |                                                    |                    |
| 23 | Roles and           | <a href="#">#5a</a> | Names, affiliations, and roles of protocol         | 1, 14              |
| 24 |                     |                     |                                                    |                    |
| 25 | responsibilities:   |                     | contributors                                       |                    |
| 26 |                     |                     |                                                    |                    |
| 27 | contributorship     |                     |                                                    |                    |
| 28 |                     |                     |                                                    |                    |
| 29 |                     |                     |                                                    |                    |
| 30 | Roles and           | <a href="#">#5b</a> | Name and contact information for the trial         | N/A (page 14)      |
| 31 |                     |                     |                                                    |                    |
| 32 | responsibilities:   |                     | sponsor                                            |                    |
| 33 |                     |                     |                                                    |                    |
| 34 | sponsor contact     |                     |                                                    |                    |
| 35 |                     |                     |                                                    |                    |
| 36 |                     |                     |                                                    |                    |
| 37 | information         |                     |                                                    |                    |
| 38 |                     |                     |                                                    |                    |
| 39 |                     |                     |                                                    |                    |
| 40 | Roles and           | <a href="#">#5c</a> | Role of study sponsor and funders, if any, in      | N/A (page 13)      |
| 41 |                     |                     |                                                    |                    |
| 42 | responsibilities:   |                     | study design; collection, management, analysis,    |                    |
| 43 |                     |                     |                                                    |                    |
| 44 | sponsor and funder  |                     | and interpretation of data; writing of the report; |                    |
| 45 |                     |                     |                                                    |                    |
| 46 |                     |                     |                                                    |                    |
| 47 |                     |                     | and the decision to submit the report for          |                    |
| 48 |                     |                     |                                                    |                    |
| 49 |                     |                     | publication, including whether they will have      |                    |
| 50 |                     |                     |                                                    |                    |
| 51 |                     |                     | ultimate authority over any of these activities    |                    |
| 52 |                     |                     |                                                    |                    |
| 53 |                     |                     |                                                    |                    |
| 54 |                     |                     |                                                    |                    |
| 55 |                     |                     |                                                    |                    |
| 56 |                     |                     |                                                    |                    |
| 57 |                     |                     |                                                    |                    |
| 58 |                     |                     |                                                    |                    |
| 59 |                     |                     |                                                    |                    |
| 60 |                     |                     |                                                    |                    |

|    |                      |                     |                                                     |      |
|----|----------------------|---------------------|-----------------------------------------------------|------|
| 1  | Roles and            | <a href="#">#5d</a> | Composition, roles, and responsibilities of the     | 13   |
| 2  |                      |                     |                                                     |      |
| 3  | responsibilities:    |                     | coordinating centre, steering committee,            |      |
| 4  |                      |                     |                                                     |      |
| 5  | committees           |                     | endpoint adjudication committee, data               |      |
| 6  |                      |                     |                                                     |      |
| 7  |                      |                     | management team, and other individuals or           |      |
| 8  |                      |                     |                                                     |      |
| 9  |                      |                     | groups overseeing the trial, if applicable (see     |      |
| 10 |                      |                     |                                                     |      |
| 11 |                      |                     | Item 21a for data monitoring committee)             |      |
| 12 |                      |                     |                                                     |      |
| 13 |                      |                     |                                                     |      |
| 14 |                      |                     |                                                     |      |
| 15 | <b>Introduction</b>  |                     |                                                     |      |
| 16 |                      |                     |                                                     |      |
| 17 |                      |                     |                                                     |      |
| 18 | Background and       | <a href="#">#6a</a> | Description of research question and                | 4-5  |
| 19 |                      |                     |                                                     |      |
| 20 | rationale            |                     | justification for undertaking the trial, including  |      |
| 21 |                      |                     |                                                     |      |
| 22 |                      |                     | summary of relevant studies (published and          |      |
| 23 |                      |                     |                                                     |      |
| 24 |                      |                     | unpublished) examining benefits and harms for       |      |
| 25 |                      |                     |                                                     |      |
| 26 |                      |                     | each intervention                                   |      |
| 27 |                      |                     |                                                     |      |
| 28 |                      |                     |                                                     |      |
| 29 |                      |                     |                                                     |      |
| 30 |                      |                     |                                                     |      |
| 31 | Background and       | <a href="#">#6b</a> | Explanation for choice of comparators               | 4-5  |
| 32 |                      |                     |                                                     |      |
| 33 | rationale: choice of |                     |                                                     |      |
| 34 |                      |                     |                                                     |      |
| 35 | comparators          |                     |                                                     |      |
| 36 |                      |                     |                                                     |      |
| 37 |                      |                     |                                                     |      |
| 38 | Objectives           | <a href="#">#7</a>  | Specific objectives or hypotheses                   | 6, 9 |
| 39 |                      |                     |                                                     |      |
| 40 |                      |                     |                                                     |      |
| 41 | Trial design         | <a href="#">#8</a>  | Description of trial design including type of trial | 9-10 |
| 42 |                      |                     |                                                     |      |
| 43 |                      |                     | (eg, parallel group, crossover, factorial, single   |      |
| 44 |                      |                     |                                                     |      |
| 45 |                      |                     | group), allocation ratio, and framework (eg,        |      |
| 46 |                      |                     |                                                     |      |
| 47 |                      |                     | superiority, equivalence, non-inferiority,          |      |
| 48 |                      |                     |                                                     |      |
| 49 |                      |                     | exploratory)                                        |      |
| 50 |                      |                     |                                                     |      |
| 51 |                      |                     |                                                     |      |
| 52 |                      |                     |                                                     |      |
| 53 |                      |                     |                                                     |      |
| 54 | <b>Methods:</b>      |                     |                                                     |      |
| 55 |                      |                     |                                                     |      |
| 56 | <b>Participants,</b> |                     |                                                     |      |
| 57 |                      |                     |                                                     |      |
| 58 |                      |                     |                                                     |      |
| 59 |                      |                     |                                                     |      |
| 60 |                      |                     |                                                     |      |

1 **interventions, and**

2  
3 **outcomes**

4  
5

|    |                      |                      |                                                                                                                                                                                                  |                                                                       |
|----|----------------------|----------------------|--------------------------------------------------------------------------------------------------------------------------------------------------------------------------------------------------|-----------------------------------------------------------------------|
| 6  | Study setting        | <a href="#">#9</a>   | Description of study settings (eg, community clinic, academic hospital) and list of countries where data will be collected. Reference to where list of study sites can be obtained               | 6                                                                     |
| 7  |                      |                      |                                                                                                                                                                                                  |                                                                       |
| 8  |                      |                      |                                                                                                                                                                                                  |                                                                       |
| 9  |                      |                      |                                                                                                                                                                                                  |                                                                       |
| 10 |                      |                      |                                                                                                                                                                                                  |                                                                       |
| 11 |                      |                      |                                                                                                                                                                                                  |                                                                       |
| 12 |                      |                      |                                                                                                                                                                                                  |                                                                       |
| 13 |                      |                      |                                                                                                                                                                                                  |                                                                       |
| 14 |                      |                      |                                                                                                                                                                                                  |                                                                       |
| 15 |                      |                      |                                                                                                                                                                                                  |                                                                       |
| 16 | Eligibility criteria | <a href="#">#10</a>  | Inclusion and exclusion criteria for participants. If applicable, eligibility criteria for study centres and individuals who will perform the interventions (eg, surgeons, psychotherapists)     | 10                                                                    |
| 17 |                      |                      |                                                                                                                                                                                                  |                                                                       |
| 18 |                      |                      |                                                                                                                                                                                                  |                                                                       |
| 19 |                      |                      |                                                                                                                                                                                                  |                                                                       |
| 20 |                      |                      |                                                                                                                                                                                                  |                                                                       |
| 21 |                      |                      |                                                                                                                                                                                                  |                                                                       |
| 22 |                      |                      |                                                                                                                                                                                                  |                                                                       |
| 23 |                      |                      |                                                                                                                                                                                                  |                                                                       |
| 24 |                      |                      |                                                                                                                                                                                                  |                                                                       |
| 25 | Interventions:       | <a href="#">#11a</a> | Interventions for each group with sufficient detail to allow replication, including how and when they will be administered                                                                       | 7-9, 10                                                               |
| 26 | description          |                      |                                                                                                                                                                                                  |                                                                       |
| 27 |                      |                      |                                                                                                                                                                                                  |                                                                       |
| 28 |                      |                      |                                                                                                                                                                                                  |                                                                       |
| 29 |                      |                      |                                                                                                                                                                                                  |                                                                       |
| 30 |                      |                      |                                                                                                                                                                                                  |                                                                       |
| 31 |                      |                      |                                                                                                                                                                                                  |                                                                       |
| 32 |                      |                      |                                                                                                                                                                                                  |                                                                       |
| 33 | Interventions:       | <a href="#">#11b</a> | Criteria for discontinuing or modifying allocated interventions for a given trial participant (eg, drug dose change in response to harms, participant request, or improving / worsening disease) | N/A (complex intervention on organization of care)                    |
| 34 | modifications        |                      |                                                                                                                                                                                                  |                                                                       |
| 35 |                      |                      |                                                                                                                                                                                                  |                                                                       |
| 36 |                      |                      |                                                                                                                                                                                                  |                                                                       |
| 37 |                      |                      |                                                                                                                                                                                                  |                                                                       |
| 38 |                      |                      |                                                                                                                                                                                                  |                                                                       |
| 39 |                      |                      |                                                                                                                                                                                                  |                                                                       |
| 40 |                      |                      |                                                                                                                                                                                                  |                                                                       |
| 41 |                      |                      |                                                                                                                                                                                                  |                                                                       |
| 42 |                      |                      |                                                                                                                                                                                                  |                                                                       |
| 43 |                      |                      |                                                                                                                                                                                                  |                                                                       |
| 44 |                      |                      |                                                                                                                                                                                                  |                                                                       |
| 45 | Interventions:       | <a href="#">#11c</a> | Strategies to improve adherence to intervention protocols, and any procedures for monitoring adherence (eg, drug tablet return; laboratory tests)                                                | N/A (the intervention concerns organization of care in nursing homes) |
| 46 | adherence            |                      |                                                                                                                                                                                                  |                                                                       |
| 47 |                      |                      |                                                                                                                                                                                                  |                                                                       |
| 48 |                      |                      |                                                                                                                                                                                                  |                                                                       |
| 49 |                      |                      |                                                                                                                                                                                                  |                                                                       |
| 50 |                      |                      |                                                                                                                                                                                                  |                                                                       |
| 51 |                      |                      |                                                                                                                                                                                                  |                                                                       |
| 52 |                      |                      |                                                                                                                                                                                                  |                                                                       |
| 53 |                      |                      |                                                                                                                                                                                                  |                                                                       |
| 54 |                      |                      |                                                                                                                                                                                                  |                                                                       |
| 55 |                      |                      |                                                                                                                                                                                                  |                                                                       |
| 56 |                      |                      |                                                                                                                                                                                                  |                                                                       |
| 57 |                      |                      |                                                                                                                                                                                                  |                                                                       |
| 58 |                      |                      |                                                                                                                                                                                                  |                                                                       |
| 59 |                      |                      |                                                                                                                                                                                                  |                                                                       |
| 60 |                      |                      |                                                                                                                                                                                                  |                                                                       |

|    |                      |                      |                                                   |                       |
|----|----------------------|----------------------|---------------------------------------------------|-----------------------|
| 1  | Interventions:       | <a href="#">#11d</a> | Relevant concomitant care and interventions       | 7-10                  |
| 2  |                      |                      |                                                   |                       |
| 3  | concomitant care     |                      | that are permitted or prohibited during the trial |                       |
| 4  |                      |                      |                                                   |                       |
| 5  |                      |                      |                                                   |                       |
| 6  | Outcomes             | <a href="#">#12</a>  | Primary, secondary, and other outcomes,           | 10                    |
| 7  |                      |                      |                                                   |                       |
| 8  |                      |                      | including the specific measurement variable       |                       |
| 9  |                      |                      |                                                   |                       |
| 10 |                      |                      |                                                   |                       |
| 11 |                      |                      | (eg, systolic blood pressure), analysis metric    |                       |
| 12 |                      |                      |                                                   |                       |
| 13 |                      |                      | (eg, change from baseline, final value, time to   |                       |
| 14 |                      |                      |                                                   |                       |
| 15 |                      |                      | event), method of aggregation (eg, median,        |                       |
| 16 |                      |                      |                                                   |                       |
| 17 |                      |                      | proportion), and time point for each outcome.     |                       |
| 18 |                      |                      |                                                   |                       |
| 19 |                      |                      | Explanation of the clinical relevance of chosen   |                       |
| 20 |                      |                      |                                                   |                       |
| 21 |                      |                      | efficacy and harm outcomes is strongly            |                       |
| 22 |                      |                      |                                                   |                       |
| 23 |                      |                      | recommended                                       |                       |
| 24 |                      |                      |                                                   |                       |
| 25 |                      |                      |                                                   |                       |
| 26 |                      |                      |                                                   |                       |
| 27 |                      |                      |                                                   |                       |
| 28 | Participant timeline | <a href="#">#13</a>  | Time schedule of enrolment, interventions         | 11                    |
| 29 |                      |                      |                                                   |                       |
| 30 |                      |                      | (including any run-ins and washouts),             |                       |
| 31 |                      |                      |                                                   |                       |
| 32 |                      |                      | assessments, and visits for participants. A       |                       |
| 33 |                      |                      |                                                   |                       |
| 34 |                      |                      | schematic diagram is highly recommended (see      |                       |
| 35 |                      |                      |                                                   |                       |
| 36 |                      |                      | Figure)                                           |                       |
| 37 |                      |                      |                                                   |                       |
| 38 |                      |                      |                                                   |                       |
| 39 |                      |                      |                                                   |                       |
| 40 | Sample size          | <a href="#">#14</a>  | Estimated number of participants needed to        | 11                    |
| 41 |                      |                      |                                                   |                       |
| 42 |                      |                      | achieve study objectives and how it was           |                       |
| 43 |                      |                      |                                                   |                       |
| 44 |                      |                      | determined, including clinical and statistical    |                       |
| 45 |                      |                      |                                                   |                       |
| 46 |                      |                      | assumptions supporting any sample size            |                       |
| 47 |                      |                      |                                                   |                       |
| 48 |                      |                      | calculations                                      |                       |
| 49 |                      |                      |                                                   |                       |
| 50 |                      |                      |                                                   |                       |
| 51 |                      |                      |                                                   |                       |
| 52 | Recruitment          | <a href="#">#15</a>  | Strategies for achieving adequate participant     | N/A (all residents in |
| 53 |                      |                      |                                                   | participating nursing |
| 54 |                      |                      | enrolment to reach target sample size             | homes will be         |
| 55 |                      |                      |                                                   |                       |
| 56 |                      |                      |                                                   |                       |
| 57 |                      |                      |                                                   |                       |
| 58 |                      |                      |                                                   |                       |
| 59 |                      |                      |                                                   |                       |
| 60 |                      |                      |                                                   |                       |



eligible for the  
study)

**Methods:**

**Assignment of  
interventions (for  
controlled trials)**

|                                        |                      |                                                                                                                                                                                                                                                                                                                                                          |                                                                            |
|----------------------------------------|----------------------|----------------------------------------------------------------------------------------------------------------------------------------------------------------------------------------------------------------------------------------------------------------------------------------------------------------------------------------------------------|----------------------------------------------------------------------------|
| Allocation:<br>sequence<br>generation  | <a href="#">#16a</a> | Method of generating the allocation sequence (eg, computer-generated random numbers), and list of any factors for stratification. To reduce predictability of a random sequence, details of any planned restriction (eg, blocking) should be provided in a separate document that is unavailable to those who enrol participants or assign interventions | N/A (quasi-<br>experimental study<br>design on<br>organization of<br>care) |
| Allocation<br>concealment<br>mechanism | <a href="#">#16b</a> | Mechanism of implementing the allocation sequence (eg, central telephone; sequentially numbered, opaque, sealed envelopes), describing any steps to conceal the sequence until interventions are assigned                                                                                                                                                | N/A (quasi-<br>experimental study<br>design on<br>organization of<br>care) |
| Allocation:<br>implementation          | <a href="#">#16c</a> | Who will generate the allocation sequence, who will enrol participants, and who will assign participants to interventions                                                                                                                                                                                                                                | N/A (quasi-<br>experimental study<br>design on<br>organization of<br>care) |

|                                                                                                                                                          |                                                           |                      |                                                                                                                                                                                                                                                                                                                                                                                                              |                                                               |
|----------------------------------------------------------------------------------------------------------------------------------------------------------|-----------------------------------------------------------|----------------------|--------------------------------------------------------------------------------------------------------------------------------------------------------------------------------------------------------------------------------------------------------------------------------------------------------------------------------------------------------------------------------------------------------------|---------------------------------------------------------------|
| 1<br>2<br>3<br>4<br>5<br>6<br>7<br>8<br>9<br>10<br>11<br>12                                                                                              | Blinding (masking)                                        | <a href="#">#17a</a> | Who will be blinded after assignment to interventions (eg, trial participants, care providers, outcome assessors, data analysts), and how                                                                                                                                                                                                                                                                    | N/A (quasi-experimental study design on organization of care) |
| 13<br>14<br>15<br>16<br>17<br>18<br>19<br>20<br>21<br>22<br>23<br>24                                                                                     | Blinding (masking):<br>emergency<br>unblinding            | <a href="#">#17b</a> | If blinded, circumstances under which unblinding is permissible, and procedure for revealing a participant's allocated intervention during the trial                                                                                                                                                                                                                                                         | N/A (quasi-experimental study design on organization of care) |
| 25<br>26<br>27<br>28<br>29<br>30<br>31<br>32<br>33<br>34                                                                                                 | <b>Methods: Data collection, management, and analysis</b> |                      |                                                                                                                                                                                                                                                                                                                                                                                                              |                                                               |
| 35<br>36<br>37<br>38<br>39<br>40<br>41<br>42<br>43<br>44<br>45<br>46<br>47<br>48<br>49<br>50<br>51<br>52<br>53<br>54<br>55<br>56<br>57<br>58<br>59<br>60 | Data collection plan                                      | <a href="#">#18a</a> | Plans for assessment and collection of outcome, baseline, and other trial data, including any related processes to promote data quality (eg, duplicate measurements, training of assessors) and a description of study instruments (eg, questionnaires, laboratory tests) along with their reliability and validity, if known. Reference to where data collection forms can be found, if not in the protocol | 10-11                                                         |

|    |                        |                      |                                                  |                    |
|----|------------------------|----------------------|--------------------------------------------------|--------------------|
| 1  | Data collection        | <a href="#">#18b</a> | Plans to promote participant retention and       | N/A (quasi-        |
| 2  |                        |                      |                                                  |                    |
| 3  | plan: retention        |                      | complete follow-up, including list of any        | experimental study |
| 4  |                        |                      |                                                  |                    |
| 5  |                        |                      | outcome data to be collected for participants    | design on          |
| 6  |                        |                      |                                                  |                    |
| 7  |                        |                      | who discontinue or deviate from intervention     | organization of    |
| 8  |                        |                      |                                                  |                    |
| 9  |                        |                      | protocols                                        | care)              |
| 10 |                        |                      |                                                  |                    |
| 11 |                        |                      |                                                  |                    |
| 12 |                        |                      |                                                  |                    |
| 13 | Data management        | <a href="#">#19</a>  | Plans for data entry, coding, security, and      | 11, 13             |
| 14 |                        |                      |                                                  |                    |
| 15 |                        |                      | storage, including any related processes to      |                    |
| 16 |                        |                      |                                                  |                    |
| 17 |                        |                      | promote data quality (eg, double data entry;     |                    |
| 18 |                        |                      |                                                  |                    |
| 19 |                        |                      | range checks for data values). Reference to      |                    |
| 20 |                        |                      |                                                  |                    |
| 21 |                        |                      | where details of data management procedures      |                    |
| 22 |                        |                      |                                                  |                    |
| 23 |                        |                      | can be found, if not in the protocol             |                    |
| 24 |                        |                      |                                                  |                    |
| 25 |                        |                      |                                                  |                    |
| 26 |                        |                      |                                                  |                    |
| 27 |                        |                      |                                                  |                    |
| 28 | Statistics:            | <a href="#">#20a</a> | Statistical methods for analysing primary and    | 12                 |
| 29 |                        |                      |                                                  |                    |
| 30 | outcomes               |                      | secondary outcomes. Reference to where other     |                    |
| 31 |                        |                      |                                                  |                    |
| 32 |                        |                      | details of the statistical analysis plan can be  |                    |
| 33 |                        |                      |                                                  |                    |
| 34 |                        |                      | found, if not in the protocol                    |                    |
| 35 |                        |                      |                                                  |                    |
| 36 |                        |                      |                                                  |                    |
| 37 |                        |                      |                                                  |                    |
| 38 | Statistics: additional | <a href="#">#20b</a> | Methods for any additional analyses (eg,         | 12                 |
| 39 |                        |                      |                                                  |                    |
| 40 | analyses               |                      | subgroup and adjusted analyses)                  |                    |
| 41 |                        |                      |                                                  |                    |
| 42 |                        |                      |                                                  |                    |
| 43 | Statistics: analysis   | <a href="#">#20c</a> | Definition of analysis population relating to    | N/A due to         |
| 44 |                        |                      |                                                  |                    |
| 45 | population and         |                      | protocol non-adherence (eg, as randomised        | particular study   |
| 46 |                        |                      |                                                  |                    |
| 47 | missing data           |                      | analysis), and any statistical methods to handle | design             |
| 48 |                        |                      |                                                  |                    |
| 49 |                        |                      | missing data (eg, multiple imputation)           |                    |
| 50 |                        |                      |                                                  |                    |
| 51 |                        |                      |                                                  |                    |
| 52 |                        |                      |                                                  |                    |

## Methods:

### Monitoring

|    |                      |                      |                                                   |                  |
|----|----------------------|----------------------|---------------------------------------------------|------------------|
| 1  | Data monitoring:     | <a href="#">#21a</a> | Composition of data monitoring committee          | 13               |
| 2  |                      |                      | (DMC); summary of its role and reporting          |                  |
| 3  | formal committee     |                      | structure; statement of whether it is             |                  |
| 4  |                      |                      | independent from the sponsor and competing        |                  |
| 5  |                      |                      | interests; and reference to where further details |                  |
| 6  |                      |                      | about its charter can be found, if not in the     |                  |
| 7  |                      |                      | protocol. Alternatively, an explanation of why a  |                  |
| 8  |                      |                      | DMC is not needed                                 |                  |
| 9  |                      |                      |                                                   |                  |
| 10 | Data monitoring:     | <a href="#">#21b</a> | Description of any interim analyses and           | 13               |
| 11 |                      |                      | stopping guidelines, including who will have      |                  |
| 12 | interim analysis     |                      | access to these interim results and make the      |                  |
| 13 |                      |                      | final decision to terminate the trial             |                  |
| 14 |                      |                      |                                                   |                  |
| 15 |                      |                      |                                                   |                  |
| 16 |                      |                      |                                                   |                  |
| 17 |                      |                      |                                                   |                  |
| 18 |                      |                      |                                                   |                  |
| 19 |                      |                      |                                                   |                  |
| 20 | Harms                | <a href="#">#22</a>  | Plans for collecting, assessing, reporting, and   | N/A due to       |
| 21 |                      |                      | managing solicited and spontaneously reported     | particular study |
| 22 |                      |                      | adverse events and other unintended effects of    | design           |
| 23 |                      |                      | trial interventions or trial conduct              |                  |
| 24 |                      |                      |                                                   |                  |
| 25 |                      |                      |                                                   |                  |
| 26 |                      |                      |                                                   |                  |
| 27 |                      |                      |                                                   |                  |
| 28 |                      |                      |                                                   |                  |
| 29 |                      |                      |                                                   |                  |
| 30 | Auditing             | <a href="#">#23</a>  | Frequency and procedures for auditing trial       | N/A due to       |
| 31 |                      |                      | conduct, if any, and whether the process will be  | particular study |
| 32 |                      |                      | independent from investigators and the sponsor    | design           |
| 33 |                      |                      |                                                   |                  |
| 34 |                      |                      |                                                   |                  |
| 35 |                      |                      |                                                   |                  |
| 36 |                      |                      |                                                   |                  |
| 37 |                      |                      |                                                   |                  |
| 38 |                      |                      |                                                   |                  |
| 39 |                      |                      |                                                   |                  |
| 40 | <b>Ethics and</b>    |                      |                                                   |                  |
| 41 | <b>dissemination</b> |                      |                                                   |                  |
| 42 |                      |                      |                                                   |                  |
| 43 |                      |                      |                                                   |                  |
| 44 |                      |                      |                                                   |                  |
| 45 |                      |                      |                                                   |                  |
| 46 |                      |                      |                                                   |                  |
| 47 |                      |                      |                                                   |                  |
| 48 |                      |                      |                                                   |                  |
| 49 |                      |                      |                                                   |                  |
| 50 |                      |                      |                                                   |                  |
| 51 |                      |                      |                                                   |                  |
| 52 |                      |                      |                                                   |                  |
| 53 | Research ethics      | <a href="#">#24</a>  | Plans for seeking research ethics committee /     | 12-13            |
| 54 |                      |                      | institutional review board (REC / IRB) approval   |                  |
| 55 | approval             |                      |                                                   |                  |
| 56 |                      |                      |                                                   |                  |
| 57 |                      |                      |                                                   |                  |
| 58 |                      |                      |                                                   |                  |
| 59 |                      |                      |                                                   |                  |
| 60 |                      |                      |                                                   |                  |

|    |                    |                      |                                                      |              |
|----|--------------------|----------------------|------------------------------------------------------|--------------|
| 1  | Protocol           | <a href="#">#25</a>  | Plans for communicating important protocol           | 12-13 +      |
| 2  |                    |                      |                                                      |              |
| 3  | amendments         |                      | modifications (eg, changes to eligibility criteria,  | supplemental |
| 4  |                    |                      | outcomes, analyses) to relevant parties (eg,         | material     |
| 5  |                    |                      | investigators, REC / IRBs, trial participants, trial |              |
| 6  |                    |                      | registries, journals, regulators)                    |              |
| 7  |                    |                      |                                                      |              |
| 8  |                    |                      |                                                      |              |
| 9  |                    |                      |                                                      |              |
| 10 |                    |                      |                                                      |              |
| 11 |                    |                      |                                                      |              |
| 12 |                    |                      |                                                      |              |
| 13 | Consent or assent  | <a href="#">#26a</a> | Who will obtain informed consent or assent           | 12-13 +      |
| 14 |                    |                      | from potential trial participants or authorised      | supplemental |
| 15 |                    |                      | surrogates, and how (see Item 32)                    | material     |
| 16 |                    |                      |                                                      |              |
| 17 |                    |                      |                                                      |              |
| 18 |                    |                      |                                                      |              |
| 19 |                    |                      |                                                      |              |
| 20 |                    |                      |                                                      |              |
| 21 | Consent or assent: | <a href="#">#26b</a> | Additional consent provisions for collection and     | 12-13 +      |
| 22 | ancillary studies  |                      | use of participant data and biological               | supplemental |
| 23 |                    |                      | specimens in ancillary studies, if applicable        | material     |
| 24 |                    |                      |                                                      |              |
| 25 |                    |                      |                                                      |              |
| 26 |                    |                      |                                                      |              |
| 27 |                    |                      |                                                      |              |
| 28 | Confidentiality    | <a href="#">#27</a>  | How personal information about potential and         | 12-13 +      |
| 29 |                    |                      | enrolled participants will be collected, shared,     | supplemental |
| 30 |                    |                      | and maintained in order to protect                   | material     |
| 31 |                    |                      | confidentiality before, during, and after the trial  |              |
| 32 |                    |                      |                                                      |              |
| 33 |                    |                      |                                                      |              |
| 34 |                    |                      |                                                      |              |
| 35 |                    |                      |                                                      |              |
| 36 |                    |                      |                                                      |              |
| 37 |                    |                      |                                                      |              |
| 38 | Declaration of     | <a href="#">#28</a>  | Financial and other competing interests for          | 14           |
| 39 | interests          |                      | principal investigators for the overall trial and    |              |
| 40 |                    |                      | each study site                                      |              |
| 41 |                    |                      |                                                      |              |
| 42 |                    |                      |                                                      |              |
| 43 |                    |                      |                                                      |              |
| 44 |                    |                      |                                                      |              |
| 45 |                    |                      |                                                      |              |
| 46 | Data access        | <a href="#">#29</a>  | Statement of who will have access to the final       | 12-13 +      |
| 47 |                    |                      | trial dataset, and disclosure of contractual         | supplemental |
| 48 |                    |                      | agreements that limit such access for                | material     |
| 49 |                    |                      | investigators                                        |              |
| 50 |                    |                      |                                                      |              |
| 51 |                    |                      |                                                      |              |
| 52 |                    |                      |                                                      |              |
| 53 |                    |                      |                                                      |              |
| 54 |                    |                      |                                                      |              |
| 55 |                    |                      |                                                      |              |
| 56 |                    |                      |                                                      |              |
| 57 |                    |                      |                                                      |              |
| 58 |                    |                      |                                                      |              |
| 59 |                    |                      |                                                      |              |
| 60 |                    |                      |                                                      |              |

|    |                       |                      |                                                    |                   |
|----|-----------------------|----------------------|----------------------------------------------------|-------------------|
| 1  | Ancillary and post    | <a href="#">#30</a>  | Provisions, if any, for ancillary and post-trial   | N/A due to        |
| 2  |                       |                      |                                                    |                   |
| 3  | trial care            |                      | care, and for compensation to those who suffer     | particular study  |
| 4  |                       |                      |                                                    |                   |
| 5  |                       |                      | harm from trial participation                      | design            |
| 6  |                       |                      |                                                    |                   |
| 7  |                       |                      |                                                    |                   |
| 8  | Dissemination         | <a href="#">#31a</a> | Plans for investigators and sponsor to             | 13 + supplemental |
| 9  |                       |                      |                                                    |                   |
| 10 | policy: trial results |                      | communicate trial results to participants,         | material          |
| 11 |                       |                      |                                                    |                   |
| 12 |                       |                      | healthcare professionals, the public, and other    |                   |
| 13 |                       |                      |                                                    |                   |
| 14 |                       |                      | relevant groups (eg, via publication, reporting in |                   |
| 15 |                       |                      |                                                    |                   |
| 16 |                       |                      | results databases, or other data sharing           |                   |
| 17 |                       |                      |                                                    |                   |
| 18 |                       |                      | arrangements), including any publication           |                   |
| 19 |                       |                      |                                                    |                   |
| 20 |                       |                      | restrictions                                       |                   |
| 21 |                       |                      |                                                    |                   |
| 22 |                       |                      |                                                    |                   |
| 23 |                       |                      |                                                    |                   |
| 24 |                       |                      |                                                    |                   |
| 25 | Dissemination         | <a href="#">#31b</a> | Authorship eligibility guidelines and any          | Supplemental      |
| 26 |                       |                      |                                                    |                   |
| 27 | policy: authorship    |                      | intended use of professional writers               | material          |
| 28 |                       |                      |                                                    |                   |
| 29 |                       |                      |                                                    |                   |
| 30 |                       |                      |                                                    |                   |
| 31 | Dissemination         | <a href="#">#31c</a> | Plans, if any, for granting public access to the   | Supplemental      |
| 32 |                       |                      |                                                    |                   |
| 33 | policy: reproducible  |                      | full protocol, participant-level dataset, and      | material          |
| 34 |                       |                      |                                                    |                   |
| 35 | research              |                      | statistical code                                   |                   |
| 36 |                       |                      |                                                    |                   |
| 37 |                       |                      |                                                    |                   |
| 38 | <b>Appendices</b>     |                      |                                                    |                   |
| 39 |                       |                      |                                                    |                   |
| 40 |                       |                      |                                                    |                   |
| 41 | Informed consent      | <a href="#">#32</a>  | Model consent form and other related               | Supplemental      |
| 42 |                       |                      |                                                    |                   |
| 43 | materials             |                      | documentation given to participants and            | material          |
| 44 |                       |                      |                                                    |                   |
| 45 |                       |                      | authorised surrogates                              |                   |
| 46 |                       |                      |                                                    |                   |
| 47 |                       |                      |                                                    |                   |
| 48 |                       |                      |                                                    |                   |
| 49 | Biological            | <a href="#">#33</a>  | Plans for collection, laboratory evaluation, and   | N/A due to study  |
| 50 |                       |                      |                                                    |                   |
| 51 | specimens             |                      | storage of biological specimens for genetic or     | design            |
| 52 |                       |                      |                                                    |                   |
| 53 |                       |                      | molecular analysis in the current trial and for    |                   |
| 54 |                       |                      |                                                    |                   |
| 55 |                       |                      | future use in ancillary studies, if applicable     |                   |
| 56 |                       |                      |                                                    |                   |
| 57 |                       |                      |                                                    |                   |
| 58 |                       |                      |                                                    |                   |
| 59 |                       |                      |                                                    |                   |
| 60 |                       |                      |                                                    |                   |

1 None The SPIRIT checklist is distributed under the terms of the Creative Commons Attribution  
2 License CC-BY-ND 3.0. This checklist can be completed online using <https://www.goodreports.org/>, a  
3 tool made by the [EQUATOR Network](#) in collaboration with [Penelope.ai](#)  
4  
5  
6  
7  
8  
9  
10

11 **NOTE: The original protocol approved by the competent Ethics Committee (in English language) has**  
12 **been uploaded as Supplemental Material.**  
13  
14  
15  
16  
17  
18  
19  
20  
21  
22  
23  
24  
25  
26  
27  
28  
29  
30  
31  
32  
33  
34  
35  
36  
37  
38  
39  
40  
41  
42  
43  
44  
45  
46  
47  
48  
49  
50  
51  
52  
53  
54  
55  
56  
57  
58  
59  
60

# BMJ Open

## Implementation of a strategy involving a multidisciplinary mobile unit team to prevent hospital admission in nursing home residents: protocol of a quasi-experimental study (MMU-1 Study)

|                                 |                                                                                                                                                                                                                                                                                                                                                                                                                                                                                                                                                                                                                                                                                                                                                                                                                                                                                                                                                                                                                                                                                                                                                                                                                                                                                                                                                                                            |
|---------------------------------|--------------------------------------------------------------------------------------------------------------------------------------------------------------------------------------------------------------------------------------------------------------------------------------------------------------------------------------------------------------------------------------------------------------------------------------------------------------------------------------------------------------------------------------------------------------------------------------------------------------------------------------------------------------------------------------------------------------------------------------------------------------------------------------------------------------------------------------------------------------------------------------------------------------------------------------------------------------------------------------------------------------------------------------------------------------------------------------------------------------------------------------------------------------------------------------------------------------------------------------------------------------------------------------------------------------------------------------------------------------------------------------------|
| Journal:                        | <i>BMJ Open</i>                                                                                                                                                                                                                                                                                                                                                                                                                                                                                                                                                                                                                                                                                                                                                                                                                                                                                                                                                                                                                                                                                                                                                                                                                                                                                                                                                                            |
| Manuscript ID                   | bmjopen-2019-034742.R1                                                                                                                                                                                                                                                                                                                                                                                                                                                                                                                                                                                                                                                                                                                                                                                                                                                                                                                                                                                                                                                                                                                                                                                                                                                                                                                                                                     |
| Article Type:                   | Protocol                                                                                                                                                                                                                                                                                                                                                                                                                                                                                                                                                                                                                                                                                                                                                                                                                                                                                                                                                                                                                                                                                                                                                                                                                                                                                                                                                                                   |
| Date Submitted by the Author:   | 20-Dec-2019                                                                                                                                                                                                                                                                                                                                                                                                                                                                                                                                                                                                                                                                                                                                                                                                                                                                                                                                                                                                                                                                                                                                                                                                                                                                                                                                                                                |
| Complete List of Authors:       | Nouvenne, Antonio; Azienda Ospedaliero-Universitaria di Parma, Geriatric-Rehabilitation Department<br>Caminiti, Caterina; Azienda Ospedaliero-Universitaria di Parma, Research and Innovation Unit<br>Diodati, Francesca; Azienda Ospedaliero-Universitaria di Parma, Research and Innovation Unit<br>Iezzi, Elisa; Azienda Ospedaliero-Universitaria di Parma, Research and Innovation Unit<br>Prati, Beatrice; Azienda Ospedaliero-Universitaria di Parma, Geriatric-Rehabilitation Department<br>Lucertini, Stefano; Azienda Unità Sanitaria Locale di Parma, Primary Care Department<br>Schianchi, Paolo; Azienda Unità Sanitaria Locale di Parma, Primary Care Department<br>Pascale, Federica; Azienda Unità Sanitaria Locale di Parma, Primary Care Department<br>Starcich, Bruno; Azienda Unità Sanitaria Locale di Parma, Primary Care Department<br>Manotti, Pietro; Azienda Ospedaliero-Universitaria di Parma, Medical Direction<br>Brianti, Ettore; Azienda Ospedaliero-Universitaria di Parma, Medical Direction<br>Fabi, Massimo; Azienda Ospedaliero-Universitaria di Parma, General Manager<br>Ticinesi, Andrea; Azienda Ospedaliero-Universitaria di Parma, Geriatric-Rehabilitation Department<br>Meschi, Tiziana; Azienda Ospedaliero-Universitaria di Parma, Geriatric-Rehabilitation Department; Università degli studi di Parma, Department of Medicine and Surgery |
| <b>Primary Subject Heading</b>: | Geriatric medicine                                                                                                                                                                                                                                                                                                                                                                                                                                                                                                                                                                                                                                                                                                                                                                                                                                                                                                                                                                                                                                                                                                                                                                                                                                                                                                                                                                         |
| Secondary Subject Heading:      | General practice / Family practice, Emergency medicine                                                                                                                                                                                                                                                                                                                                                                                                                                                                                                                                                                                                                                                                                                                                                                                                                                                                                                                                                                                                                                                                                                                                                                                                                                                                                                                                     |
| Keywords:                       | Organisation of health services < HEALTH SERVICES ADMINISTRATION & MANAGEMENT, Quality in health care < HEALTH SERVICES ADMINISTRATION & MANAGEMENT, GERIATRIC MEDICINE                                                                                                                                                                                                                                                                                                                                                                                                                                                                                                                                                                                                                                                                                                                                                                                                                                                                                                                                                                                                                                                                                                                                                                                                                    |



1  
2  
3  
4  
5  
6  
7  
8  
9  
10  
11  
12  
13  
14  
15  
16  
17  
18  
19  
20  
21  
22  
23  
24  
25  
26  
27  
28  
29  
30  
31  
32  
33  
34  
35  
36  
37  
38  
39  
40  
41  
42  
43  
44  
45  
46  
47  
48  
49  
50  
51  
52  
53  
54  
55  
56  
57  
58  
59  
60

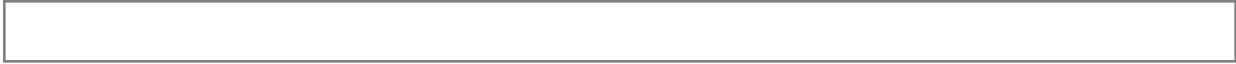

SCHOLARONE™  
Manuscripts

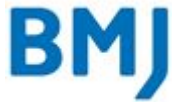

I, the Submitting Author has the right to grant and does grant on behalf of all authors of the Work (as defined in the below author licence), an exclusive licence and/or a non-exclusive licence for contributions from authors who are: i) UK Crown employees; ii) where BMJ has agreed a CC-BY licence shall apply, and/or iii) in accordance with the terms applicable for US Federal Government officers or employees acting as part of their official duties; on a worldwide, perpetual, irrevocable, royalty-free basis to BMJ Publishing Group Ltd ("BMJ") its licensees and where the relevant Journal is co-owned by BMJ to the co-owners of the Journal, to publish the Work in this journal and any other BMJ products and to exploit all rights, as set out in our [licence](#).

The Submitting Author accepts and understands that any supply made under these terms is made by BMJ to the Submitting Author unless you are acting as an employee on behalf of your employer or a postgraduate student of an affiliated institution which is paying any applicable article publishing charge ("APC") for Open Access articles. Where the Submitting Author wishes to make the Work available on an Open Access basis (and intends to pay the relevant APC), the terms of reuse of such Open Access shall be governed by a Creative Commons licence – details of these licences and which [Creative Commons](#) licence will apply to this Work are set out in our licence referred to above.

Other than as permitted in any relevant BMJ Author's Self Archiving Policies, I confirm this Work has not been accepted for publication elsewhere, is not being considered for publication elsewhere and does not duplicate material already published. I confirm all authors consent to publication of this Work and authorise the granting of this licence.

1  
2  
3  
4  
5  
6  
7  
8  
9  
10  
11  
12  
13  
14  
15  
16  
17  
18  
19  
20  
21  
22  
23  
24  
25  
26  
27  
28  
29  
30  
31  
32  
33  
34  
35  
36  
37  
38  
39  
40  
41  
42  
43  
44  
45  
46  
47  
48  
49  
50  
51  
52  
53  
54  
55  
56  
57  
58  
59  
60

1     **Implementation of a strategy involving a multidisciplinary mobile unit team to prevent hospital**  
2  
3     **admission in nursing home residents: protocol of a quasi-experimental study (MMU-1 Study)**  
4  
5  
6     3

Antonio Nouvenne<sup>1</sup>, Caterina Caminiti<sup>2</sup>, Francesca Diodati<sup>2</sup>, Elisa Iezzi<sup>2</sup>, Beatrice Prati<sup>1</sup>, Stefano Lucertini<sup>3</sup>,  
Paolo Schianchi<sup>3</sup>, Federica Pascale<sup>3</sup>, Bruno Starcich<sup>3</sup>, Pietro Manotti<sup>4</sup>, Ettore Brianti<sup>4</sup>, Massimo Fabi<sup>5</sup>,  
Andrea Ticinesi<sup>1\*</sup>, Tiziana Meschi<sup>1,6</sup>

<sup>1</sup>Geriatric Rehabilitation Department, Azienda Ospedaliero-Universitaria di Parma, Via Antonio Gramsci 14,  
43126 Parma, Italy

<sup>2</sup>Research and Innovation Unit, Azienda Ospedaliero-Universitaria di Parma, Via Antonio Gramsci 14,  
43126 Parma, Italy

<sup>3</sup>Primary Care Department, Azienda Unità Sanitaria Locale di Parma, Strada del Quartiere 2/A, 43125  
Parma, Italy

<sup>4</sup>Medical Direction, Azienda Ospedaliero-Universitaria di Parma, Via Antonio Gramsci 14, 43126 Parma,  
Italy

<sup>5</sup>General Manager, Azienda Ospedaliero-Universitaria di Parma, Via Antonio Gramsci 14, 43126 Parma,  
Italy

<sup>6</sup>Department of Medicine and Surgery, University of Parma, Via Antonio Gramsci 14, 43126 Parma, Italy

**Corresponding author:**

\*Andrea Ticinesi, MD, PhD, Geriatric-Rehabilitation Department, Parma University-Hospital (Azienda  
Ospedaliero-Universitaria di Parma), via Antonio Gramsci 14, 43126 Parma, Italy.

Work Telephone number: 0039-0521703871; Mobile: 00393471845191; Fax: 0039-0521702383

E-mail address: [aticinesi@ao.pr.it](mailto:aticinesi@ao.pr.it)

**Word count:** 3700

**Abstract:** 299; **Tables:** 1; **Figures:** 2; **References:** 30

**Running Title:** Multidisciplinary mobile unit intervention for nursing homes

1 **ABSTRACT**

2  
3 **Introduction-** Nursing home residents represent a particularly vulnerable population experiencing high risk  
4  
5 of unplanned hospital admissions, but few interventions have proved effective in reducing this risk. The aim  
6  
7 of this research will be to verify the effects of a hospital-based multidisciplinary mobile unit (MMU) team  
8  
9 intervention delivering urgent care to nursing home residents directly at their bedside.

10  
11 **Methods and analysis-** Four nursing homes based in the Parma province, in Northern Italy, will be involved  
12  
13 in this prospective, pragmatic, multicenter, 18-month quasi-experimental study (sequential design with two  
14  
15 cohorts). The residents of two nursing homes will receive the MMU team care intervention. In case of urgent  
16  
17 care needs, the nursing home physician will contact the hospital physician responsible for the MMU team by  
18  
19 phone. The case will be triaged as a) manageable by phone advice, b) requiring urgent assessment by the MMU  
20  
21 team or c) requiring immediate ED referral. MMU team is composed of one senior physician and one  
22  
23 Emergency-Medicine resident chosen within the staff of Internal Medicine and Critical Subacute Care Unit of  
24  
25 Parma University-Hospital, usually with different specialty background, and equipped with portable  
26  
27 ultrasound, set of drugs and devices useful in urgency. The MMU visits patients in nursing homes, with the  
28  
29 mission to stabilize clinical conditions and avoid hospital admission. Residents of the other two nursing homes  
30  
31 will receive usual care, i.e. ED referral in every case of urgency. Study endpoints include unplanned hospital  
32  
33 admissions (primary), crude all-cause mortality, hospital mortality, length of stay and healthcare-related costs  
34  
35 (secondary).

36  
37 **Ethics and dissemination-** The study protocol was approved by the Ethics Committee of Area Vasta Emilia  
38  
39 Nord. Informed consent will be collected from patients or their legal representatives. The results will be  
40  
41 actively disseminated through peer-reviewed journals and conference presentations, in compliance with the  
42  
43 Italian law.

44  
45 **Registration ID-** ClinicalTrials.gov NCT 04085679

46  
47  
48  
49  
50  
51  
52 **Key words:** multimorbidity; geriatrics; hospitalization; multidisciplinary care; hospital-community  
53  
54 partnership

1  
2  
3  
4  
5  
6  
7  
8  
9  
10  
11  
12  
13  
14  
15  
16  
17  
18  
19  
20  
21  
22  
23  
24  
25  
26  
27  
28  
29  
30  
31  
32  
33  
34  
35  
36  
37  
38  
39  
40  
41  
42  
43  
44  
45  
46  
47  
48  
49  
50  
51  
52  
53  
54  
55  
56  
57  
58  
59  
60

## 1 STRENGTHS AND LIMITATIONS OF THIS STUDY

- 2 ✓ This study will explore the effectiveness of a complex intervention focused on the avoidance of
- 3 hospital admissions for nursing home residents, with a strong hospital-community partnership.
- 4 ✓ The study intervention consists in bringing specialist hospital care directly at the bedside of nursing
- 5 home residents, an innovative approach not previously described in the scientific literature.
- 6 ✓ The intervention has been developed considering the organization of the Italian healthcare system, but
- 7 is reproducible and applicable in other settings.
- 8 ✓ Due to ethical concerns and the complex nature of the intervention, randomization of participants is
- 9 not possible.

For peer review only

## 1 INTRODUCTION

2 The increasing clinical complexity of older medical patients, due to multimorbidity, polypharmacy, frailty,  
3 disability and social hardship, is challenging for health care systems.<sup>1 2</sup> These characteristics are emphasized  
4 in nursing home residents, who experience a particularly high risk of Emergency Department (ED) visits and  
5 hospitalization (greater than 20% per year).<sup>3-8</sup> In the ED, these patients may experience misdiagnoses and  
6 undertreatment, due to their clinical complexity and atypical presentation of acute illness, and substantially  
7 contribute to the overcrowding phenomenon.<sup>4 5 9-11</sup> Once admitted to wards, they are also far more likely to  
8 have long stays (>2 weeks)<sup>9</sup> and experience hospital-related complications.<sup>12</sup>

9 In the light of these considerations, confirmed by large cohort studies conducted in the United States and  
10 Canada,<sup>7 8</sup> a number of approaches have been developed designed to reduce the risk of hospitalization in  
11 nursing home residents. These are summarized in the recent systematic review by Santosaputri et al,<sup>13</sup> which  
12 includes quantitative comparative studies of all designs aiming to determine the efficacy of interventions  
13 provided by a health professional with specialization in geriatric medicine. Sixteen studies were eligible, of  
14 which 6 randomized controlled trials, involving an estimated total of over 7400 patients. The authors of the  
15 review categorized 14 intervention programs into three primary approaches (two did not fit in any category):

- 16 - Prevention approach (nine studies): Interventions applied in the nursing home to prevent  
17 hospitalization of residents, in most cases involving care provided by nurses, physicians, and  
18 sometimes allied health personnel. The majority of interventions involved either direct review of  
19 patients, telephone (or telemedicine) support, or comprehensive geriatric assessment.
- 20 - Emergency department-based hospital avoidance (three studies): interventions targeting nursing home  
21 residents presenting to the ED to facilitate early discharge and avoid hospitalization. Programs of this  
22 type involved care provided by nursing staff (e.g. intravenous therapy, wound care, catheter  
23 management).
- 24 - Post-hospital supported discharge (two studies): Interventions designed to support residents in the care  
25 transition from the hospital to nursing home, to prevent readmissions, including geriatrician and nurse  
26 review in the facility and standardized rehabilitation programs.

27 Although the majority of the studies reported reductions in hospitalizations (in the form of either ED  
28 presentations or hospital admissions), only six, with different designs and interventions, obtained statistically  
29 significant findings.<sup>14-19</sup> Two of these studies, with a retrospective design, involved delivery of routine care to

1 nursing home residents by hospital-based nursing staff, with the possibility of obtaining support from a  
2 geriatrician in case of urgent situations.<sup>14-15</sup> In another prospective quasi-experimental study, a team including  
3 a geriatrician and specialized nurses supported the nursing home physician in delivering routine care and in  
4 managing urgent clinical situations.<sup>16</sup> The remaining three studies, all with prospective quasi-experimental  
5 design, were more focused on selected clinical scenarios, involving advice and education by ED staff to nursing  
6 home personnel after ED admission of residents,<sup>17</sup> hospital nurse visits in the nursing home to implement  
7 strategies of delirium prevention,<sup>18</sup> and rehabilitation intervention delivered by a geriatric orthopedic team to  
8 residents with hip fracture.<sup>19</sup>

9 Unfortunately, the quality of evidence was considered low to moderate, therefore further, well-designed studies  
10 are needed to identify which interventions are effective in reducing hospitalization in the older residents.<sup>13</sup> The  
11 interventions performed in the existing studies were also mainly focused on routine care, while a prompt and  
12 correct management of urgent situations and acute/subacute conditions may be of paramount importance for  
13 avoiding ED admissions in nursing home residents. Namely, interventions delivering urgent care with a  
14 multidisciplinary approach, based not only on geriatric expertise but also on the capacity of performing first  
15 line diagnostic examinations, such as ultrasonography, and basic invasive procedures, such as central venous  
16 line or nasogastric tube insertion, have a great potential of being successful in reducing ED visits, but have not  
17 been adequately investigated to date.

18 At our institution, different projects have been carried out for many years to improve care of the elderly,  
19 primarily targeting hospital organization, with the main objective to reduce unnecessary, avoidable length of  
20 stay (LOS).<sup>20-22</sup> These efforts benefit in-hospital patients, but are not designed to prevent hospitalizations. In  
21 this framework, based on literature evidence, best current knowledge and long-time experience with elderly  
22 care developed at our university-hospital, we hypothesize that a complex intervention delivered in nursing  
23 homes, where vulnerable high-risk patients live, involving direct patient care by hospital medical staff with  
24 multidisciplinary approach grounded on geriatric expertise, may reduce hospitalization of residents.

## 25 26 **METHODS AND ANALYSIS**

### 27 **Study setting**

28 The study is based in the University Hospital of Parma, which has a catchment area of more than 400,000  
29 inhabitants, of whom 22.3% is over 65 years old. It provides the only Emergency service of the district, and it

1 ranks fourth in Italy by number of ED visits (yearly average of over 110,000). The average admission rate of  
2 the adult ED population is 18%, of which 65% concern people older than 65.

3 In the last two decades, the University Hospital of Parma has implemented several innovative initiatives to  
4 manage the hospital flow of frail multimorbid patients and their complex needs. These initiatives included bed  
5 management to avoid “bed-blockers”,<sup>20</sup> physician accountability for the discharge process,<sup>21</sup> and creation of a  
6 dedicated hospital unit, organized by intensity of care to anticipate the needs of these patients preserving high  
7 performance indices.<sup>22</sup> The MMU team will be based in this unit, called Internal Medicine and Critical  
8 Subacute Care.

9 Nursing homes participating in the study are public facilities of similar size (90-100 residents) which ensure  
10 the presence of nursing staff 24 hours a day and of a physician at least 4 hours a day (high-intensity care  
11 facilities), in compliance with the care standards set by the Local Health Authority. No staff member is shared  
12 among the participating nursing homes. The possible role of distance to the hospital is considered by including  
13 in each group one nursing home located next to the hospital and one located at a distance of >5 km.

14 The participating nursing homes are the following CRAs (Casa Residenza Anziani):

- 15 - C.R.A. “I Tigli” Parma (intervention group)
- 16 - C.R.A. “Casa degli Anziani”, Collecchio (intervention group)
- 17 - C.R.A. “Le Tamerici” Parma (control group)
- 18 - C.R.A. “Ines Ubaldi”, Parma (control group)

19 This study follows a multimethod approach, based on the Medical Research Council framework for developing  
20 and evaluating complex interventions,<sup>23</sup> including the development, feasibility assessment, and evaluation  
21 phases.

### 22 **Development of the intervention**

23 First, the different types of approaches reported in the literature, described above, were considered.<sup>13</sup> The  
24 “prevention approach”, interventions conducted in nursing homes, was chosen as the most suitable strategy to  
25 integrate the hospital’s organizational model already in place, as it can target both hospitalization rates and ED  
26 overcrowding, allowing to intervene before the person accesses the hospital.

27 Available evidence also prompted us to opt for a multicomponent approach. In fact, the current literature,  
28 mainly based on qualitative interviews with nursing home staff members in different countries, suggests that  
29



1 the decision to transfer residents to hospital may be influenced by different factors, such as staffing and skill  
2  
3 2 mix in the nursing homes, treatment options available in the facility, end-of-life decision-making, and  
4  
5 3 communication and bureaucratic requirements.<sup>24</sup> This multifactorial association means that a multicomponent  
6  
7 4 intervention is likely to be more effective than a single-component intervention.<sup>25</sup>

9  
10 5 Based on the Schippinger<sup>16</sup> and Diaz-Gegundez<sup>26</sup> studies, we created a mobile physician service. Unlike those  
11  
12 6 studies, we did not involve a nurse, because the participating facilities have nursing staff available 24 hours a  
13  
14 7 day, and we used medical hospital staff because routine clinical management and scheduled follow-up  
15  
16 8 evaluations are already performed by nursing home physicians during their office hours.

17  
18 9 Finally, medical hospital staff was preferred to community geriatricians, on the assumption that older patients  
19  
20 10 may feel more comfortable being handled by physicians who may have already cared for them at the hospital.  
21  
22 11 Moreover, hospital staff enables direct patient referral to the ward. Finally, this allows the use of diagnostic  
23  
24 12 technologies available at the hospital, which can be used immediately without the need for hospital admission.  
25  
26  
27 13

#### 28 29 14 **Description of the intervention**

30  
31 15 The model hinges on the strong collaboration between hospital and nursing home staff to provide residents  
32  
33 16 with patient-centered care. It entails a multicomponent intervention which is integrated in standard care and  
34  
35 17 comprises three steps: 1) MMU team activation, 2) on site visit by a team of physicians with geriatric expertise,  
36  
37 18 3) interdisciplinary care planning (Figure 1).  
38  
39 19

#### 40 41 20 *Step 1: MMU team activation*

42  
43 21 Patient selection is necessary to ensure that available resources are used for patients who may really benefit.  
44  
45 22 To this end, the nursing home physician contacts by phone the “flow manager”, a skilled internist with strong  
46  
47 23 clinical expertise, organizational attitude and managerial training, during the 8 a.m.-6 p.m. time frame, Monday  
48  
49 24 to Friday. The phone consultation is reported on a form containing the description of the patient’s clinical  
50  
51 25 condition and a summary of the conversation. The form also indicates which decision was reached among the  
52  
53 26 following six not mutually exclusive options:

- 54 26
- 55
- 56 27 a) The patient can be managed by nursing home staff, therapeutic advice is provided by phone
- 57
- 58 28 b) Remote reassessment is scheduled after a number of hours agreed upon by the team
- 59
- 60 29 c) The MMU team is dispatched for evaluation, treatment and stabilization on site

- 1  
2 1 d) A significant change in vital parameters is observed which requires immediate activation of emergency  
3  
4 2 services  
5  
6 3 e) Direct hospital admission is considered necessary  
7  
8 4 f) Ambulatory outpatient visits or tests are planned  
9

10 5  
11  
12 6 *Step 2: on site visit by a team of physicians with geriatric expertise*

13  
14 7 Visits at the nursing home are performed by two members of the MMU team: an expert hospital physician  
15  
16 8 chosen on a case-by-case basis among the clinical staff of the Internal Medicine and Critical Subacute Care  
17  
18 9 Unit, depending on the disease or clinical problem that must be treated, and a specifically trained resident in  
19  
20 10 Emergency Medicine. The physicians that may be involved in MMU activation include specialists in internal  
21  
22 11 medicine, clinical ultrasonography, gastroenterology, geriatrics or clinical nutrition.

23  
24 12 The team is provided with a car to reach the nursing homes, a portable ultrasound system, and an essential set  
25  
26 13 of drugs and medical devices useful in an emergency setting. The ultrasound system is equipped with three  
27  
28 14 probes (convex, linear, and phased-array) for performing thoraco-pulmonary, cardiac, vascular, abdominal and  
29  
30 15 soft tissue ultrasound, when required. Available drugs include those that can be administered intravenously for  
31  
32 16 treating urgent conditions (e.g. loop diuretics, steroids, fluids, antibiotics). Devices include central and  
33  
34 17 peripheral venous lines, naso-gastric and rectal tubes and bladder catheters. Blood tests can also be performed.

35  
36 18 Table 1 shows possible clinical scenarios which may require MMU team activation, and possible decisions.  
37  
38  
39  
40  
41

42 20 *Step 3: interdisciplinary care planning*

43  
44 21 Based on the results of the visit and of any performed investigations, the MMU team formulates personalized  
45  
46 22 advice and referrals, and discusses these with the nursing home physician. If stabilization on site is not deemed  
47  
48 23 possible, the MMU team plans a direct admission to the Internal Medicine and Critical Subacute Care Unit,  
49  
50 24 thus avoiding ED access. The planning and the final outcome of the intervention are recorded in the second  
51  
52 25 part of the form.  
53  
54 26

55  
56 27 **Feasibility assessment**  
57  
58  
59  
60

1 A pilot phase of 5 months (December 2018-April 2019) was conducted in two nursing homes in order to look  
2 at feasibility of the MMU care Model described above. Before the intervention was introduced, meetings were  
3 held with nursing home staff to agree on activation modalities.

4 In this period, 99 phone calls were received, of which 84 required MMU team onsite visits, and 15 were  
5 managed with remote consultancy. Of the latter, 3 required direct admission after remote phone consultancy.  
6 Only 4 of the 84 patients visited onsite required direct admission. One patient was sent to the ED for massive  
7 intestinal bleeding (Figure 2).

8 This phase demonstrated the feasibility of the intervention, and did not highlight any need for modifications.

## 10 **Evaluation phase**

### 11 *Aim and objectives*

12 The study aim is to verify the effects of the implementation of the MMU care model tested in the pilot phase.  
13 Primary objective is to verify reduction of unplanned hospitalization rates in the nursing homes of the  
14 intervention group compared to the nursing homes in the control group. Secondary objectives are to measure  
15 the effects of the intervention in terms of mortality, health service use, and costs.

### 17 *Study Design*

18 This study is a prospective, pragmatic, cluster-multicenter, quasi-experimental study (sequential design with  
19 two cohorts), in which usual nursing home care is compared to care provided by applying the MMU model.

20 The cluster design was selected because the intervention is organizational and requires high involvement of all  
21 center staff; therefore, randomizing individual clinicians or patients would entail a high risk of contamination  
22 bias. A quasi-randomized design was chosen as it prevents the need to discontinue the intervention conducted  
23 in two nursing homes which had participated in the pilot phase, and would thus be more acceptable by staff.  
24 Furthermore, quasi-experiments do not imply the selection effects and “artificiality” of randomized trials, and  
25 are thus more suitable for studies on intervention implementation in real life, enabling a high degree of external  
26 validity.<sup>27</sup>

27 A stepped-wedge design would have been desirable, enabling all participating nursing homes to receive the  
28 intervention, but was deemed unfeasible because it entails a larger sample size and study duration; furthermore,

1 the currently available technical and human resources would not be sufficient to sustain MMU intervention  
2 delivery in more than two nursing homes at the same time.

#### 3 4 *Study Population*

5 All residents of the participating nursing homes are eligible, regardless of their clinical status. Informed consent  
6 will be collected from patients or their proxies/legal representatives, according to the European Union law.  
7 Refusal to provide informed consent, either by patients or legal representatives, will imply study exclusion.

#### 8 9 *Usual Care*

10 Patients in the control cohort receive usual care, which means the actions to take are decided by the nursing  
11 home staff. Generally, this implies that patients who are clinically unstable, or require urgent instrumental  
12 tests, will be sent to the ED.

#### 13 14 *Measures: Baseline variables*

15 Demographic data on gender and age are collected by chart review.

#### 16 17 *Measures: Outcome variables*

18 The primary outcome is hospitalization rate, considering at the numerator all unplanned admissions occurred  
19 during a 1-year period, and at the denominator the sum of the person-time of the at risk population (days of  
20 stay at the nursing home). For the intervention group, the numerator corresponds to options d) and e) defined  
21 in “Step 1: MMU team activation”.

22 The secondary outcomes are the following:

- 23 - Crude all-cause Death Rate (CDR): the number of deaths during 1-year period on person-time of the  
24 at risk population
- 25 - Hospital Mortality rate: the frequency of patients who die while in the hospital (death rate/1000)
- 26 - Length of stay (LOS): the duration of a single episode of hospitalization. Inpatient days are calculated  
27 by subtracting day of admission from day of discharge.

- 1 1 - Adverse events or complications: frequency of events with novel unexpected worsening of clinical  
2  
3 2 conditions occurring within 48 hours from MMU team activation, for which hospital access becomes  
4  
5 3 necessary.  
6  
7 4 - Costs analysis, comparing the cost differences in the two groups  
8  
9

### 10 5 11 12 6 *Data Collection*

13  
14 7 Patient demographic and clinical characteristics will be collected at baseline from nursing home clinical  
15  
16 8 records to describe the study population and determine hospital admission rate. For participants in the control  
17  
18 9 group, only data on age, sex, timing of admission and discharge in nursing home will be collected. For those  
19  
20 10 in the intervention group, additional data on any MMU activation (reasons, timing, intervention, procedures  
21  
22 11 and outcomes) will be collected with a specific Case Report Form (CRF).

23  
24 12 Participants' files and electronic data will be stored securely at the study site (e.g. locked area, password  
25  
26 13 protected hard- and software). Data integrity will be scrutinized with several strategies (e.g. valid values, range  
27  
28 14 checks, consistency checks). Patient data will be only identifiable with the unique participant's number.  
29  
30 15 Personal information will be collected and saved in a separate file (on a different server) which can only be  
31  
32 16 accessed by the Principal Investigator (PI). For the primary outcome, information will be obtained using  
33  
34 17 administrative databases of the hospital and nursing homes. For secondary outcomes the following data sources  
35  
36 18 will be used: validated regional death registry to determine CDR; electronic discharge summaries to calculate  
37  
38 19 hospital mortality rate and LOS; electronic ED registry to detect adverse events or complications; hospital  
39  
40 20 administrative database and CRF for the cost analysis. Residents' identification data will be deleted once the  
41  
42 21 study is completed, making the dataset anonymous. All study protocol authors will have access to the  
43  
44 22 anonymous dataset.  
45  
46  
47  
48  
49

### 50 24 *Study duration*

51  
52 25 Overall expected duration is 18 months, with study initiation presumably in November 2019 and completion  
53  
54 26 in April 2021.  
55  
56  
57

### 58 28 **Statistical Methodology**

#### 59 60 29 *Sample size calculation*

1 The number of subjects to include was estimated using the findings of Diaz-Gegundez et al, who performed a  
2 large quasi-experimental trial.<sup>26</sup> Thus, considering 56 cases vs 32 cases per 100 residents, and using a 2-sided,  
3 large-samples z-test of the Poisson incidence rate difference at a significance level of 0.05, and with a power  
4 of 0.90, overall 338 residents should be enrolled. Since each of the participating nursing homes has between  
5 90 and 100 residents, the study appears as feasible.

### 6 *Statistical analysis plan*

7 Descriptive statistics will be used to summarize patient populations and will be presented as means and  
8 standard deviations (SD) when normally distributed, or as medians and interquartile ranges (IQR).

9 For the primary analysis we will use Poisson regression with robust standard errors (SEs) to evaluate relative  
10 differences in hospital rates among our two cohorts while adjusting for demographic characteristics.

11 Concerning the secondary outcomes, the following analyses will be performed:

- 12 - Rates will be compared considering the quotient between the intervention and control groups
- 13 - A lognormal model will be used to compare in-hospital LOS.
- 14 - Chi square tests will be conducted for categorical data as adverse events or complications

15 The demographic and clinical variables which influence the outcome with a p value<0.20 in the univariate  
16 analysis will be included in the Poisson regression model.

17 Finally, cost analysis will be performed. We will identify the changes in net costs associated with one-year  
18 exposure to the intervention, consisting in the induced costs due to incremental resource inputs for carrying  
19 out the intervention and hospital health service utilization costs. Staffing costs will be calculated considering  
20 the time spent by the professionals involved in the intervention. Non-staff running costs include expenses of  
21 MMU staff travelling to and from the nursing home. The health service utilization costs will be identified  
22 based on the standard regional tariffs assigned to each admission according to the Diagnosis Related Group  
23 (DRG) system. We will use the following equations to summarize the annual net costs associated with the  
24 implementation of the intervention. Any costs with negative values mean “savings” and any costs with positive  
25 values mean “losses”. Net costs  $\hat{A}$  (intervention costs)  $\pm$  B (Costs for differences in hospital health service  
26 utilization) where: A= intervention: staffing costs+intervention: non- staff costs and B= Costs for differences  
27 in inpatient care utilization. Therefore, the net costs arising from one-year implementation of the intervention

1 as compared with the current practice will be obtained, where a negative value of net costs represents “cost-  
2 saving” and a positive value represents “not cost-saving”

3 The analyses will be performed using SAS 8.2 (SAS Institute, Cary, NC, USA) and STATA-SE 11 (Stata Corp  
4 LP, College Station, TX, USA).

5

## 6 **ETHICS AND DISSEMINATION**

7 The study will be conducted in compliance with the principles of the revision of the Helsinki Declaration and  
8 by current legislation on scientific research. All participants or their legal representatives will sign informed  
9 consent form. This study does not entail any experimental pharmacological treatment, or changes in the  
10 diagnostic-therapeutic pathway. Eligible patients, or their legal representatives, will be also asked to give  
11 written consent to handling of their personal data. If a patient wishes to discontinue his/her participation in the  
12 study, it is the responsibility of the investigator to ensure that no further data regarding the person’s health  
13 condition shall be collected. All collected data will be used in the final analysis.

14 All data collected, handled and stored for the purpose of this study will be kept confidential at any time and  
15 will be securely stored, as required in GCP guidelines and in current privacy legislation.

16

## 17 **DISCUSSION**

18 The MMU-1 Study will represent one of the first attempts to prevent hospital admissions of nursing home  
19 residents by using a multicomponent complex intervention with a strong multidisciplinary approach. Most of  
20 previous studies in this field were in fact focused on geriatric routine care, nurse counselling and education,  
21 but did not deliver diagnostic and therapeutic interventions at the bedside in case of urgent needs.<sup>13-19,26</sup> The  
22 multidisciplinary skills of MMU-1 staff, that may involve expert physicians with different skills and  
23 background depending on the clinical problem of patients, represents a novelty at the current literature state-  
24 of-the-art and has a great potential of being successful in preventing hospital admission, considering the high  
25 clinical complexity of nursing home residents. The use of bedside ultrasound equipment also represents a high  
26 value added to the care of these patients, allowing to reach a high diagnostic accuracy and to perform invasive  
27 procedures without moving patients to the hospital.<sup>28-29</sup> The use of bedside ultrasonography in geriatrics is  
28 becoming increasingly popular but is generally unavailable in nursing homes.<sup>28-29</sup> When integrated with an  
29 accurate physical examination, bedside ultrasonography can dramatically improve the diagnostic process,<sup>30</sup>

1 especially in geriatric multimorbid patients where severity of symptoms, cognitive impairment and mobility-  
2 limitations may reduce the accuracy of traditional imaging.<sup>28-29</sup>

3 Finally, the MMU-1 intervention is not fixed into a rigid algorithm, but different kinds of consultancy can be  
4 made according to the clinical situation of each patient (Figure 1). This circumstance represents an  
5 advancement with respect of other interventions previously described in the literature,<sup>13</sup> and an effort towards  
6 personalization of geriatric care.

7 Some limitations of this study should be considered. First, we acknowledge that the stepped wedge cluster  
8 randomized design would represent the best design for testing the effects of a novel care model implemented  
9 in multiple nursing homes. However, as described above, this was not feasible due to practical and economic  
10 barriers. It is also noteworthy that most of the existing studies included in the Santosaputri review<sup>13</sup> adopted a  
11 quasi-experimental design, because, in research on complex care interventions, methodological soundness  
12 must always face practical considerations on feasibility.<sup>27</sup>

13 In conclusion, if the results of this study suggest benefits for patients and the health care system, future  
14 investigations with sounder methodology should be implemented to assess a large-scale application of the  
15 proposed care model.



1 1 **Contributors**

2  
3 2 A.N., B.P., S.L., P.M., E.B., M.F. and T.M. conceptualised the project and designed the intervention. F.D.,  
4  
5 3 A.T., P.S., F.P., B.S. and C.C. provided relevant contributions for study conception and design. E.I. gave  
6  
7 4 statistical consult. A.N., C.C., F.D. and A.T. drafted the manuscript. All the authors read and approved the  
8  
9  
10 5 final manuscript.

11 6  
12  
13  
14 7 **Funding**

15  
16 8 This research received no specific grant from any funding agency in the public, commercial or not-for-profit  
17  
18 9 sectors.

19  
20 10  
21  
22 11 **Competing interests**

23  
24 12 None declared.

25  
26 13  
27  
28 14 **Patient consent**

29  
30 15 Not required.

31  
32 16  
33  
34 17 **Ethics approval**

35  
36  
37 18 The study was approved by the competent Ethics Committee (Comitato Etico Area Vasta Emilia Nord),  
38  
39 19 under the ID 846/2019/OSS/AOUPR.

40  
41 20  
42  
43 21 **Patient and public involvement**

44  
45 22 No patient involved.

46  
47 23  
48  
49  
50  
51  
52  
53  
54  
55  
56  
57  
58  
59  
60

1  
2  
3  
4  
5  
6  
7  
8  
9  
10  
11  
12  
13  
14  
15  
16  
17  
18  
19  
20  
21  
22  
23  
24  
25  
26  
27  
28  
29  
30  
31  
32  
33  
34  
35  
36  
37  
38  
39  
40  
41  
42  
43  
44  
45  
46  
47  
48  
49  
50  
51  
52  
53  
54  
55  
56  
57  
58  
59  
60  
**REFERENCES**

1. Corazza GR, Formagnana P, Lenti MV. Bringing complexity into clinical practice: an internistic approach. *Eur J Intern Med* 2019;61:9-14.
2. Mannucci PM, Nobili A, Pasina L, *et al.* Polypharmacy in older people: lessons from 10 years of experience with the REPOSI register. *Intern Emerg Med* 2018;13(8):1191-200.
3. Samaras N, Chevalley T, Samaras D, *et al.* Older patients in the Emergency Department: a review. *Ann Emerg Med* 2010;56(3):261-9.
4. Aminzadeh F, Dalziel WB. Older adults in the emergency department: a systematic review of patterns of use, adverse outcomes, and effectiveness of interventions. *Ann Emerg Med* 2002;39(3):238-47.
5. Salvi F, Morichi V, Grilli A, *et al.* The elderly in the emergency department: a critical review of problems and solutions. *Intern Emerg Med* 2007;2(4):292-301.
6. Wyman JF, Hazzard WR. Preventing avoidable hospitalizations of nursing home residents: a multipronged approach to a perennial problem. *J Am Geriatr Soc* 2010;58(4):50-1.
7. LaMantia MA, Lane KA, Tu W, *et al.* Patterns of Emergency Department use among long-stay nursing home residents with differing levels of dementia severity. *J Am Med Dir Assoc* 2016;17(6):541-546.
8. Gruneir A, Cigsar C, Wang X, *et al.* Repeat emergency department visits by nursing home residents: a cohort study using health administrative data. *BMC Geriatr* 2018;18(1):157.
9. Jay S, Whittaker P, McIntosh J, *et al.* Can consultant geriatrician led comprehensive geriatric assessment in the emergency department reduce hospital admission rates? A systematic review. *Age Ageing* 2017;46(3):366-72.
10. Limpawattana P, Phungoen P, Mitsungnem T, *et al.* Atypical presentation of older adults at the emergency department and associated factors. *Arch Gerontol Geriatr* 2016;62:97-102.
11. Roberts DC, McKay MP, Shaffer A. Increasing rates of Emergency Department visits for elderly patients in the United States, 1993 to 2003. *Ann Emerg Med* 2008;51(6):769-74.
12. Buurman BM, Hoogerduijn JG, van Gemert EA, *et al.* Clinical characteristics and outcomes of hospitalized older patients with distinct risk profiles for functional decline: a prospective cohort study. *PLoS One* 2012;7(1):e29621.

13. Santosaputri E, Laver K, To T. Efficacy of interventions led by staff with geriatrics expertise in reducing hospitalisation in nursing home residents: A systematic review. *Australas J Ageing* 2019;38(1):5-14.
14. Street M, Considine J, Livingston P, *et al.* In-reach nursing services improve older patient outcomes and access to emergency care. *Australas J Ageing* 2015;34(2):115-120.
15. Hutchinson AF, Parikh S, Tacey M, *et al.* A longitudinal cohort study evaluating the impact of a geriatrician-led residential care outreach service on acute healthcare utilization. *Age Ageing* 2015;44:365-370.
16. Schippinger W, Hartinger G, Hierzer E, *et al.* Mobile geriatric consultant services for rest homes: study of the effects of consultations by internal medicine specialists in the medical care of rest home residents. *Z Gerontol Geriatr* 2012;45:735-41.
17. Fan L, Hou XY, Zhao J, *et al.* Hospital in the Nursing Home program reduces emergency department presentations and hospital admissions from residential aged care facilities in Queensland, Australia: a quasi-experimental study. *BMC Health Serv Res* 2016;16:46.
18. Boockvar KS, Teresi JA, Inouye SK. Preliminary data: an adapted hospital elder life program to prevent delirium and reduce complications of acute illness in long-term care delivered by certified nursing assistants. *J Am Geriatr Soc* 2016;64:1108-1113.
19. Gregersen M, Zintchouk D, Borris LC, *et al.* A geriatric multidisciplinary and tailor-made hospital-at-home method in nursing home residents with hip fracture. *Geriatr Orthop Surg Rehab* 2011;2(4):148-154.
20. Meschi T, Nouvenne A, Maggio M, *et al.* Bed-blockers: an 8 year experience of clinical management. *Eur J Intern Med* 2012;23(2):e.73-e.74.
21. Caminiti C, Meschi T, Braglia L, *et al.* Reducing unnecessary hospital days to improve quality of care through physician accountability: a cluster randomised trial. *BMC Health Serv Res* 2013;13:14.
22. Meschi T, Ticinesi A, Prati B, *et al.* A novel organizational model to face the challenge of multimorbid elderly patients in an internal medicine setting: a case study from Parma Hospital, Italy. *Intern Emerg Med* 2016;11(5):667-76.
23. Craig P, Dieppe P, Macintyre S, *et al.* Developing and evaluating complex interventions: the new Medical Research Council guidance. *BMJ* 2008;337:a1655.

- 1 1 24. Trahan LM, Spiers JA, Cummings GG. Decisions to transfer nursing home residents to emergency  
2 departments: a scoping review of contributing factors and staff perspectives. *J Am Med Dir Assoc*  
3 2016;17(11):994-1005.  
4 2  
5 3  
6 3  
7 4  
8 25. Arendts G, Howard K. The interface between residential aged care and the emergency department: a  
9 systematic review. *Age Ageing* 2010;39:306-12.  
10 5  
11 26. Díaz-Gegundez M, Paluzie G, Sanz-Ballester C, *et al.* Evaluation of an intervention program in  
12 6 nursing homes to reduce hospital attendance. *Rev Esp Geriatr Gerontol* 2011;46:261-4.  
13 7  
14 27. Bärnighausen T, Tugwell P, Røttingen JA, *et al.* Quasi-experimental study designs series-paper 4: uses  
15 8 and value. *J Clin Epidemiol* 2017; 89: 21-29.  
16 9  
17 28. Ticinesi A, Scarlata S, Nouvenne A, *et al.* The Geriatric Patient: The Ideal One for Chest  
18 10 Ultrasonography? A Review From the Chest Ultrasound in the Elderly Study Group (GRETA) of the  
19 11 Italian Society of Gerontology and Geriatrics (SIGG). *J Am Med Dir Assoc* 2019; online first Aug 6.  
20 12 Doi: 10.1016/j.jamda.2019.06.018.  
21 13  
22 29. Fröhlich E, Beller K, Muller R, *et al.* Point of Care Ultrasound in Geriatric Patients: Prospective  
23 14 Evaluation of a Portable Handheld Ultrasound Device. *Ultraschall Med* 2019; online first Apr 26. Doi:  
24 15 10.1055/a-0889-8070.  
25 16  
26 30. Narula J, Chandrashekhara Y, Braunwald E. Time to Add a Fifth Pillar to Bedside Physical  
27 17 Examination: Inspection, Palpation, Percussion, Auscultation, and Insonation. *JAMA Cardiol*  
28 18 2018;3(4):346-350.  
29 19  
30 20  
31 21  
32 22  
33  
34  
35  
36  
37  
38  
39  
40  
41  
42  
43  
44  
45  
46  
47  
48  
49  
50  
51  
52  
53  
54  
55  
56  
57  
58  
59  
60

**TABLE 1**

Overview of possible expected clinical situations for which a Multidisciplinary Mobile Unit consultation may be activated, and possible management.

| Clinical situation                                                  | Clinical question                                                                                                                                                | Mobile Unit Intervention                                                                                                                                          | Disposition                                                                                        |
|---------------------------------------------------------------------|------------------------------------------------------------------------------------------------------------------------------------------------------------------|-------------------------------------------------------------------------------------------------------------------------------------------------------------------|----------------------------------------------------------------------------------------------------|
| Dyspnea of unknown origin                                           | Pulmonary? Cardiac? Embolism?<br>Other causes?                                                                                                                   | Chest and Abdomen Ultrasound. Arterial Gas sample, ECG, intravenous antibiotic administration                                                                     | Appropriate diagnosis and treatment on site. Immediate or scheduled admission whenever appropriate |
| Abdominal pain                                                      | Gallbladder stones? Cholecystitis?<br>Renal colic? Diverticular disease?<br>Urinary retention? Faecal impaction? Peritonitis? Ascites?<br>Acute/subacute Hernia? | Abdomen ultrasound, basic blood tests, intravenous antibiotic administration                                                                                      | Appropriate diagnosis and treatment on site. Immediate or scheduled admission whenever appropriate |
| Hematuria                                                           | UTI? Catheter dysfunction? Bladder polyps? Stones?                                                                                                               | Abdomen ultrasound, Bladder lavage, Catheter (re-)positioning, Intravenous antibiotic administration                                                              | Appropriate diagnosis and treatment on site. Immediate or scheduled admission whenever appropriate |
| Psychomotor agitation in previously stable dementia                 | Inadequate therapy? Emerging internistic problem? Other                                                                                                          | CGA, Neurogeriatric visit, exclusion of internistic-emerging problem, ECG, Thoracic&abdominal US                                                                  | Appropriate diagnosis and treatment on site.                                                       |
| Fever                                                               | Origin?                                                                                                                                                          | Thoracic&abdominal US, basic blood test                                                                                                                           | Excluding common differential diagnosis                                                            |
| Absence of peripheral veins for drugs or nutrients infusion         | How to find adequate venous access                                                                                                                               | US guided Central venous catheter or PICC or peripheral access                                                                                                    | Securing patient                                                                                   |
| Monolateral leg edema                                               | DVT? Erysipelas? Trauma?                                                                                                                                         | Venous and soft tissues ultrasound                                                                                                                                | Appropriate diagnosis and treatment on site.                                                       |
| Terminal illness                                                    | Palliation strategy? How to get symptoms relief?                                                                                                                 | CGA. Multidisciplinary assessment. Positioning of drains (eg abdominal drainage for ascites). Interview with relatives / caregivers and GP for sharing strategies | Appropriate management.                                                                            |
| Ultrasound exam in a patient who can be transported with difficulty | GP's question                                                                                                                                                    | Abdominal, cardiac, arterial, thyroid, neck ultrasound                                                                                                            | Appropriate assessment                                                                             |

1  
2  
3 ECG = Electrocardiogram; UTI = Urinary Tract Infection; CGA = Comprehensive Geriatric Assessment; US = Ultrasound; PICC = Peripherally-Inserted Central Venous  
4 Catheter; DVT = Deep Vein Thrombosis; GP = General Practitioner.  
5  
6  
7  
8  
9  
10  
11  
12  
13  
14  
15  
16  
17  
18  
19  
20  
21  
22  
23  
24  
25  
26  
27  
28  
29  
30  
31  
32  
33  
34  
35  
36  
37  
38  
39  
40  
41  
42  
43  
44  
45  
46

For peer review only

1  
2  
3  
4  
5  
6  
7  
8  
9  
10  
11  
12  
13  
14  
15  
16  
17  
18  
19  
20  
21  
22  
23  
24  
25  
26  
27  
28  
29  
30  
31  
32  
33  
34  
35  
36  
37  
38  
39  
40  
41  
42  
43  
44  
45  
46  
47  
48  
49  
50  
51  
52  
53  
54  
55  
56  
57  
58  
59  
60

**FIGURE 1**

Description of the intervention of MMU Team.

For peer review only

**FIGURE 2**

Results of pilot phase.

For peer review only



1  
2  
3  
4  
5  
6  
7  
8  
9  
10  
11  
12  
13  
14  
15  
16  
17  
18  
19  
20  
21  
22  
23  
24  
25  
26  
27  
28  
29  
30  
31  
32  
33  
34  
35  
36  
37  
38  
39  
40  
41  
42  
43  
44  
45  
46  
47  
48  
49  
50  
51  
52  
53  
54  
55  
56  
57  
58  
59  
60

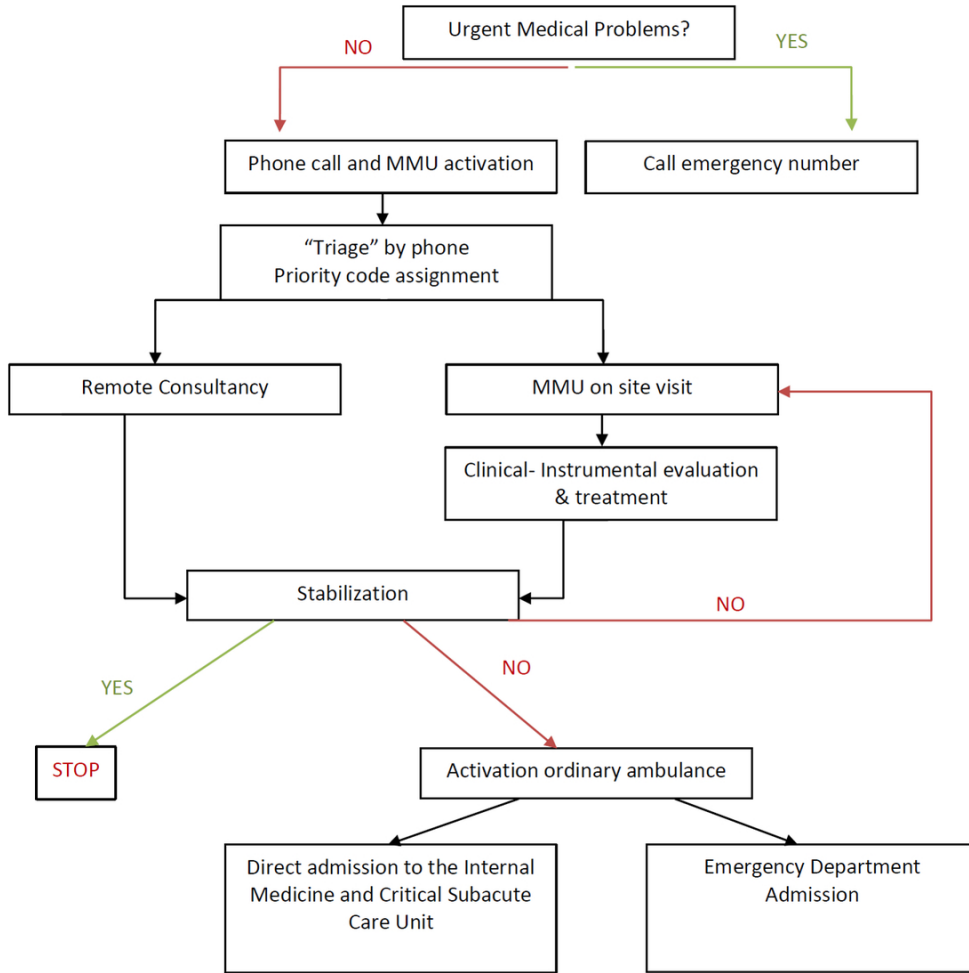

Description of the intervention of MMU Team

95x95mm (300 x 300 DPI)

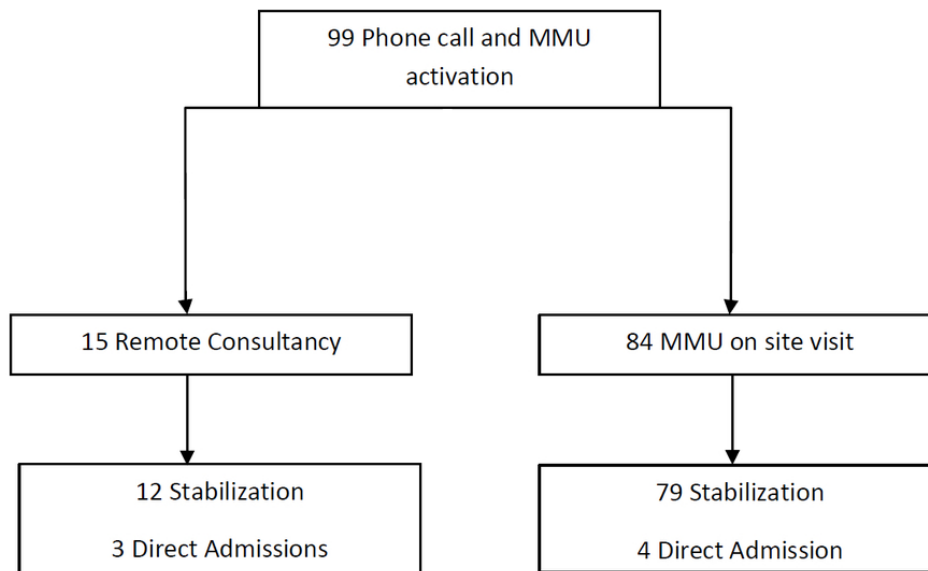

Results of pilot phase

78x48mm (300 x 300 DPI)

# Reporting checklist for protocol of a clinical trial.

Based on the SPIRIT guidelines.

## Instructions to authors

Complete this checklist by entering the page numbers from your manuscript where readers will find each of the items listed below.

Your article may not currently address all the items on the checklist. Please modify your text to include the missing information. If you are certain that an item does not apply, please write "n/a" and provide a short explanation.

Upload your completed checklist as an extra file when you submit to a journal.

In your methods section, say that you used the SPIRIT reporting guidelines, and cite them as:

Chan A-W, Tetzlaff JM, Altman DG, Laupacis A, Gøtzsche PC, Krleža-Jerić K, Hróbjartsson A, Mann H, Dickersin K, Berlin J, Doré C, Parulekar W, Summerskill W, Groves T, Schulz K, Sox H, Rockhold FW, Rennie D, Moher D. SPIRIT 2013 Statement: Defining standard protocol items for clinical trials. *Ann Intern Med.* 2013;158(3):200-207

|                                   | Reporting Item                                                                                                                  | Page Number |
|-----------------------------------|---------------------------------------------------------------------------------------------------------------------------------|-------------|
| <b>Administrative information</b> |                                                                                                                                 |             |
| Title                             | <a href="#">#1</a> Descriptive title identifying the study design, population, interventions, and, if applicable, trial acronym | 1           |

|    |                     |                     |                                                    |                    |
|----|---------------------|---------------------|----------------------------------------------------|--------------------|
| 1  | Trial registration  | <a href="#">#2a</a> | Trial identifier and registry name. If not yet     | 2, end of abstract |
| 2  |                     |                     | registered, name of intended registry              |                    |
| 3  |                     |                     |                                                    |                    |
| 4  |                     |                     |                                                    |                    |
| 5  |                     |                     |                                                    |                    |
| 6  | Trial registration: | <a href="#">#2b</a> | All items from the World Health Organization       | 2                  |
| 7  | data set            |                     | Trial Registration Data Set                        |                    |
| 8  |                     |                     |                                                    |                    |
| 9  |                     |                     |                                                    |                    |
| 10 |                     |                     |                                                    |                    |
| 11 | Protocol version    | <a href="#">#3</a>  | Date and version identifier                        | Supplemental       |
| 12 |                     |                     |                                                    | Material           |
| 13 |                     |                     |                                                    |                    |
| 14 |                     |                     |                                                    |                    |
| 15 |                     |                     |                                                    |                    |
| 16 |                     |                     |                                                    |                    |
| 17 | Funding             | <a href="#">#4</a>  | Sources and types of financial, material, and      | 14                 |
| 18 |                     |                     | other support                                      |                    |
| 19 |                     |                     |                                                    |                    |
| 20 |                     |                     |                                                    |                    |
| 21 |                     |                     |                                                    |                    |
| 22 | Roles and           | <a href="#">#5a</a> | Names, affiliations, and roles of protocol         | 1, 14              |
| 23 | responsibilities:   |                     | contributors                                       |                    |
| 24 | contributorship     |                     |                                                    |                    |
| 25 |                     |                     |                                                    |                    |
| 26 |                     |                     |                                                    |                    |
| 27 |                     |                     |                                                    |                    |
| 28 |                     |                     |                                                    |                    |
| 29 |                     |                     |                                                    |                    |
| 30 | Roles and           | <a href="#">#5b</a> | Name and contact information for the trial         | N/A (page 14)      |
| 31 | responsibilities:   |                     | sponsor                                            |                    |
| 32 | sponsor contact     |                     |                                                    |                    |
| 33 | information         |                     |                                                    |                    |
| 34 |                     |                     |                                                    |                    |
| 35 |                     |                     |                                                    |                    |
| 36 |                     |                     |                                                    |                    |
| 37 |                     |                     |                                                    |                    |
| 38 |                     |                     |                                                    |                    |
| 39 |                     |                     |                                                    |                    |
| 40 | Roles and           | <a href="#">#5c</a> | Role of study sponsor and funders, if any, in      | N/A (page 13)      |
| 41 | responsibilities:   |                     | study design; collection, management, analysis,    |                    |
| 42 | sponsor and funder  |                     | and interpretation of data; writing of the report; |                    |
| 43 |                     |                     | and the decision to submit the report for          |                    |
| 44 |                     |                     | publication, including whether they will have      |                    |
| 45 |                     |                     | ultimate authority over any of these activities    |                    |
| 46 |                     |                     |                                                    |                    |
| 47 |                     |                     |                                                    |                    |
| 48 |                     |                     |                                                    |                    |
| 49 |                     |                     |                                                    |                    |
| 50 |                     |                     |                                                    |                    |
| 51 |                     |                     |                                                    |                    |
| 52 |                     |                     |                                                    |                    |
| 53 |                     |                     |                                                    |                    |
| 54 |                     |                     |                                                    |                    |
| 55 |                     |                     |                                                    |                    |
| 56 |                     |                     |                                                    |                    |
| 57 |                     |                     |                                                    |                    |
| 58 |                     |                     |                                                    |                    |
| 59 |                     |                     |                                                    |                    |
| 60 |                     |                     |                                                    |                    |

|    |                      |                     |                                                     |      |
|----|----------------------|---------------------|-----------------------------------------------------|------|
| 1  | Roles and            | <a href="#">#5d</a> | Composition, roles, and responsibilities of the     | 13   |
| 2  |                      |                     |                                                     |      |
| 3  | responsibilities:    |                     | coordinating centre, steering committee,            |      |
| 4  |                      |                     |                                                     |      |
| 5  | committees           |                     | endpoint adjudication committee, data               |      |
| 6  |                      |                     |                                                     |      |
| 7  |                      |                     | management team, and other individuals or           |      |
| 8  |                      |                     |                                                     |      |
| 9  |                      |                     | groups overseeing the trial, if applicable (see     |      |
| 10 |                      |                     |                                                     |      |
| 11 |                      |                     | Item 21a for data monitoring committee)             |      |
| 12 |                      |                     |                                                     |      |
| 13 |                      |                     |                                                     |      |
| 14 |                      |                     |                                                     |      |
| 15 | <b>Introduction</b>  |                     |                                                     |      |
| 16 |                      |                     |                                                     |      |
| 17 |                      |                     |                                                     |      |
| 18 | Background and       | <a href="#">#6a</a> | Description of research question and                | 4-5  |
| 19 |                      |                     |                                                     |      |
| 20 | rationale            |                     | justification for undertaking the trial, including  |      |
| 21 |                      |                     |                                                     |      |
| 22 |                      |                     | summary of relevant studies (published and          |      |
| 23 |                      |                     |                                                     |      |
| 24 |                      |                     | unpublished) examining benefits and harms for       |      |
| 25 |                      |                     |                                                     |      |
| 26 |                      |                     | each intervention                                   |      |
| 27 |                      |                     |                                                     |      |
| 28 |                      |                     |                                                     |      |
| 29 |                      |                     |                                                     |      |
| 30 |                      |                     |                                                     |      |
| 31 | Background and       | <a href="#">#6b</a> | Explanation for choice of comparators               | 4-5  |
| 32 |                      |                     |                                                     |      |
| 33 | rationale: choice of |                     |                                                     |      |
| 34 |                      |                     |                                                     |      |
| 35 | comparators          |                     |                                                     |      |
| 36 |                      |                     |                                                     |      |
| 37 |                      |                     |                                                     |      |
| 38 | Objectives           | <a href="#">#7</a>  | Specific objectives or hypotheses                   | 6, 9 |
| 39 |                      |                     |                                                     |      |
| 40 |                      |                     |                                                     |      |
| 41 | Trial design         | <a href="#">#8</a>  | Description of trial design including type of trial | 9-10 |
| 42 |                      |                     |                                                     |      |
| 43 |                      |                     | (eg, parallel group, crossover, factorial, single   |      |
| 44 |                      |                     |                                                     |      |
| 45 |                      |                     | group), allocation ratio, and framework (eg,        |      |
| 46 |                      |                     |                                                     |      |
| 47 |                      |                     | superiority, equivalence, non-inferiority,          |      |
| 48 |                      |                     |                                                     |      |
| 49 |                      |                     | exploratory)                                        |      |
| 50 |                      |                     |                                                     |      |
| 51 |                      |                     |                                                     |      |
| 52 |                      |                     |                                                     |      |
| 53 |                      |                     |                                                     |      |
| 54 | <b>Methods:</b>      |                     |                                                     |      |
| 55 |                      |                     |                                                     |      |
| 56 | <b>Participants,</b> |                     |                                                     |      |
| 57 |                      |                     |                                                     |      |
| 58 |                      |                     |                                                     |      |
| 59 |                      |                     |                                                     |      |
| 60 |                      |                     |                                                     |      |

1 **interventions, and**

2 **outcomes**

3

4

5

6 Study setting [#9](#) Description of study settings (eg, community 6  
7  
8 clinic, academic hospital) and list of countries  
9  
10 where data will be collected. Reference to  
11  
12 where list of study sites can be obtained  
13  
14

15 Eligibility criteria [#10](#) Inclusion and exclusion criteria for participants. 10  
16  
17 If applicable, eligibility criteria for study centres  
18  
19 and individuals who will perform the  
20  
21 interventions (eg, surgeons, psychotherapists)  
22  
23  
24

25 Interventions: [#11a](#) Interventions for each group with sufficient 7-9, 10  
26  
27 description detail to allow replication, including how and  
28  
29 when they will be administered  
30  
31  
32

33 Interventions: [#11b](#) Criteria for discontinuing or modifying allocated N/A (complex  
34  
35 modifications interventions for a given trial participant (eg, intervention on  
36  
37 drug dose change in response to harms, organization of  
38  
39 participant request, or improving / worsening care)  
40  
41  
42 disease)  
43  
44

45 Interventions: [#11c](#) Strategies to improve adherence to intervention N/A (the  
46  
47 adherence protocols, and any procedures for monitoring intervention  
48  
49 adherence (eg, drug tablet return; laboratory concerns  
50  
51 tests) organization of care  
52  
53  
54  
55  
56  
57  
58  
59  
60

|    |                      |                      |                                                   |                       |
|----|----------------------|----------------------|---------------------------------------------------|-----------------------|
| 1  | Interventions:       | <a href="#">#11d</a> | Relevant concomitant care and interventions       | 7-10                  |
| 2  |                      |                      |                                                   |                       |
| 3  | concomitant care     |                      | that are permitted or prohibited during the trial |                       |
| 4  |                      |                      |                                                   |                       |
| 5  |                      |                      |                                                   |                       |
| 6  | Outcomes             | <a href="#">#12</a>  | Primary, secondary, and other outcomes,           | 10                    |
| 7  |                      |                      |                                                   |                       |
| 8  |                      |                      | including the specific measurement variable       |                       |
| 9  |                      |                      |                                                   |                       |
| 10 |                      |                      |                                                   |                       |
| 11 |                      |                      | (eg, systolic blood pressure), analysis metric    |                       |
| 12 |                      |                      |                                                   |                       |
| 13 |                      |                      | (eg, change from baseline, final value, time to   |                       |
| 14 |                      |                      |                                                   |                       |
| 15 |                      |                      | event), method of aggregation (eg, median,        |                       |
| 16 |                      |                      |                                                   |                       |
| 17 |                      |                      | proportion), and time point for each outcome.     |                       |
| 18 |                      |                      |                                                   |                       |
| 19 |                      |                      | Explanation of the clinical relevance of chosen   |                       |
| 20 |                      |                      |                                                   |                       |
| 21 |                      |                      | efficacy and harm outcomes is strongly            |                       |
| 22 |                      |                      |                                                   |                       |
| 23 |                      |                      | recommended                                       |                       |
| 24 |                      |                      |                                                   |                       |
| 25 |                      |                      |                                                   |                       |
| 26 |                      |                      |                                                   |                       |
| 27 |                      |                      |                                                   |                       |
| 28 | Participant timeline | <a href="#">#13</a>  | Time schedule of enrolment, interventions         | 11                    |
| 29 |                      |                      |                                                   |                       |
| 30 |                      |                      | (including any run-ins and washouts),             |                       |
| 31 |                      |                      |                                                   |                       |
| 32 |                      |                      | assessments, and visits for participants. A       |                       |
| 33 |                      |                      |                                                   |                       |
| 34 |                      |                      | schematic diagram is highly recommended (see      |                       |
| 35 |                      |                      |                                                   |                       |
| 36 |                      |                      | Figure)                                           |                       |
| 37 |                      |                      |                                                   |                       |
| 38 |                      |                      |                                                   |                       |
| 39 |                      |                      |                                                   |                       |
| 40 | Sample size          | <a href="#">#14</a>  | Estimated number of participants needed to        | 11                    |
| 41 |                      |                      |                                                   |                       |
| 42 |                      |                      | achieve study objectives and how it was           |                       |
| 43 |                      |                      |                                                   |                       |
| 44 |                      |                      | determined, including clinical and statistical    |                       |
| 45 |                      |                      |                                                   |                       |
| 46 |                      |                      | assumptions supporting any sample size            |                       |
| 47 |                      |                      |                                                   |                       |
| 48 |                      |                      | calculations                                      |                       |
| 49 |                      |                      |                                                   |                       |
| 50 |                      |                      |                                                   |                       |
| 51 |                      |                      |                                                   |                       |
| 52 | Recruitment          | <a href="#">#15</a>  | Strategies for achieving adequate participant     | N/A (all residents in |
| 53 |                      |                      |                                                   | participating nursing |
| 54 |                      |                      | enrolment to reach target sample size             | homes will be         |
| 55 |                      |                      |                                                   |                       |
| 56 |                      |                      |                                                   |                       |
| 57 |                      |                      |                                                   |                       |
| 58 |                      |                      |                                                   |                       |
| 59 |                      |                      |                                                   |                       |
| 60 |                      |                      |                                                   |                       |

eligible for the  
study)

**Methods:**

**Assignment of  
interventions (for  
controlled trials)**

|                                        |                      |                                                                                                                                                                                                                                                                                                                                                          |                                                                            |
|----------------------------------------|----------------------|----------------------------------------------------------------------------------------------------------------------------------------------------------------------------------------------------------------------------------------------------------------------------------------------------------------------------------------------------------|----------------------------------------------------------------------------|
| Allocation:<br>sequence<br>generation  | <a href="#">#16a</a> | Method of generating the allocation sequence (eg, computer-generated random numbers), and list of any factors for stratification. To reduce predictability of a random sequence, details of any planned restriction (eg, blocking) should be provided in a separate document that is unavailable to those who enrol participants or assign interventions | N/A (quasi-<br>experimental study<br>design on<br>organization of<br>care) |
| Allocation<br>concealment<br>mechanism | <a href="#">#16b</a> | Mechanism of implementing the allocation sequence (eg, central telephone; sequentially numbered, opaque, sealed envelopes), describing any steps to conceal the sequence until interventions are assigned                                                                                                                                                | N/A (quasi-<br>experimental study<br>design on<br>organization of<br>care) |
| Allocation:<br>implementation          | <a href="#">#16c</a> | Who will generate the allocation sequence, who will enrol participants, and who will assign participants to interventions                                                                                                                                                                                                                                | N/A (quasi-<br>experimental study<br>design on<br>organization of<br>care) |



|    |                        |                      |                                                      |                    |
|----|------------------------|----------------------|------------------------------------------------------|--------------------|
| 1  | Blinding (masking)     | <a href="#">#17a</a> | Who will be blinded after assignment to              | N/A (quasi-        |
| 2  |                        |                      | interventions (eg, trial participants, care          | experimental study |
| 3  |                        |                      | providers, outcome assessors, data analysts),        | design on          |
| 4  |                        |                      | and how                                              | organization of    |
| 5  |                        |                      |                                                      | care)              |
| 6  |                        |                      |                                                      |                    |
| 7  |                        |                      |                                                      |                    |
| 8  |                        |                      |                                                      |                    |
| 9  |                        |                      |                                                      |                    |
| 10 |                        |                      |                                                      |                    |
| 11 |                        |                      |                                                      |                    |
| 12 |                        |                      |                                                      |                    |
| 13 | Blinding (masking):    | <a href="#">#17b</a> | If blinded, circumstances under which                | N/A (quasi-        |
| 14 | emergency              |                      | unblinding is permissible, and procedure for         | experimental study |
| 15 |                        |                      | revealing a participant's allocated intervention     | design on          |
| 16 | unblinding             |                      | during the trial                                     | organization of    |
| 17 |                        |                      |                                                      | care)              |
| 18 |                        |                      |                                                      |                    |
| 19 |                        |                      |                                                      |                    |
| 20 |                        |                      |                                                      |                    |
| 21 |                        |                      |                                                      |                    |
| 22 |                        |                      |                                                      |                    |
| 23 |                        |                      |                                                      |                    |
| 24 |                        |                      |                                                      |                    |
| 25 | <b>Methods: Data</b>   |                      |                                                      |                    |
| 26 | <b>collection,</b>     |                      |                                                      |                    |
| 27 | <b>management, and</b> |                      |                                                      |                    |
| 28 | <b>analysis</b>        |                      |                                                      |                    |
| 29 |                        |                      |                                                      |                    |
| 30 |                        |                      |                                                      |                    |
| 31 |                        |                      |                                                      |                    |
| 32 |                        |                      |                                                      |                    |
| 33 |                        |                      |                                                      |                    |
| 34 |                        |                      |                                                      |                    |
| 35 | Data collection plan   | <a href="#">#18a</a> | Plans for assessment and collection of               | 10-11              |
| 36 |                        |                      | outcome, baseline, and other trial data,             |                    |
| 37 |                        |                      | including any related processes to promote           |                    |
| 38 |                        |                      | data quality (eg, duplicate measurements,            |                    |
| 39 |                        |                      | training of assessors) and a description of study    |                    |
| 40 |                        |                      | instruments (eg, questionnaires, laboratory          |                    |
| 41 |                        |                      | tests) along with their reliability and validity, if |                    |
| 42 |                        |                      | known. Reference to where data collection            |                    |
| 43 |                        |                      | forms can be found, if not in the protocol           |                    |
| 44 |                        |                      |                                                      |                    |
| 45 |                        |                      |                                                      |                    |
| 46 |                        |                      |                                                      |                    |
| 47 |                        |                      |                                                      |                    |
| 48 |                        |                      |                                                      |                    |
| 49 |                        |                      |                                                      |                    |
| 50 |                        |                      |                                                      |                    |
| 51 |                        |                      |                                                      |                    |
| 52 |                        |                      |                                                      |                    |
| 53 |                        |                      |                                                      |                    |
| 54 |                        |                      |                                                      |                    |
| 55 |                        |                      |                                                      |                    |
| 56 |                        |                      |                                                      |                    |
| 57 |                        |                      |                                                      |                    |
| 58 |                        |                      |                                                      |                    |
| 59 |                        |                      |                                                      |                    |
| 60 |                        |                      |                                                      |                    |

|                                                                                        |                                                        |                      |                                                                                                                                                                                                                                                                   |                                                               |
|----------------------------------------------------------------------------------------|--------------------------------------------------------|----------------------|-------------------------------------------------------------------------------------------------------------------------------------------------------------------------------------------------------------------------------------------------------------------|---------------------------------------------------------------|
| 1<br>2<br>3<br>4<br>5<br>6<br>7<br>8<br>9<br>10<br>11<br>12                            | Data collection<br>plan: retention                     | <a href="#">#18b</a> | Plans to promote participant retention and complete follow-up, including list of any outcome data to be collected for participants who discontinue or deviate from intervention protocols                                                                         | N/A (quasi-experimental study design on organization of care) |
| 13<br>14<br>15<br>16<br>17<br>18<br>19<br>20<br>21<br>22<br>23<br>24<br>25<br>26<br>27 | Data management                                        | <a href="#">#19</a>  | Plans for data entry, coding, security, and storage, including any related processes to promote data quality (eg, double data entry; range checks for data values). Reference to where details of data management procedures can be found, if not in the protocol | 11, 13                                                        |
| 28<br>29<br>30<br>31<br>32<br>33<br>34<br>35<br>36<br>37                               | Statistics:<br>outcomes                                | <a href="#">#20a</a> | Statistical methods for analysing primary and secondary outcomes. Reference to where other details of the statistical analysis plan can be found, if not in the protocol                                                                                          | 12                                                            |
| 38<br>39<br>40<br>41<br>42                                                             | Statistics: additional<br>analyses                     | <a href="#">#20b</a> | Methods for any additional analyses (eg, subgroup and adjusted analyses)                                                                                                                                                                                          | 12                                                            |
| 43<br>44<br>45<br>46<br>47<br>48<br>49<br>50<br>51<br>52                               | Statistics: analysis<br>population and<br>missing data | <a href="#">#20c</a> | Definition of analysis population relating to protocol non-adherence (eg, as randomised analysis), and any statistical methods to handle missing data (eg, multiple imputation)                                                                                   | N/A due to particular study design                            |

### Methods:

### Monitoring

|    |                      |                      |                                                   |                  |
|----|----------------------|----------------------|---------------------------------------------------|------------------|
| 1  | Data monitoring:     | <a href="#">#21a</a> | Composition of data monitoring committee          | 13               |
| 2  |                      |                      |                                                   |                  |
| 3  | formal committee     |                      | (DMC); summary of its role and reporting          |                  |
| 4  |                      |                      | structure; statement of whether it is             |                  |
| 5  |                      |                      | independent from the sponsor and competing        |                  |
| 6  |                      |                      | interests; and reference to where further details |                  |
| 7  |                      |                      | about its charter can be found, if not in the     |                  |
| 8  |                      |                      | protocol. Alternatively, an explanation of why a  |                  |
| 9  |                      |                      | DMC is not needed                                 |                  |
| 10 |                      |                      |                                                   |                  |
| 11 | Data monitoring:     | <a href="#">#21b</a> | Description of any interim analyses and           | 13               |
| 12 |                      |                      |                                                   |                  |
| 13 | interim analysis     |                      | stopping guidelines, including who will have      |                  |
| 14 |                      |                      | access to these interim results and make the      |                  |
| 15 |                      |                      | final decision to terminate the trial             |                  |
| 16 |                      |                      |                                                   |                  |
| 17 |                      |                      |                                                   |                  |
| 18 |                      |                      |                                                   |                  |
| 19 |                      |                      |                                                   |                  |
| 20 | Harms                | <a href="#">#22</a>  | Plans for collecting, assessing, reporting, and   | N/A due to       |
| 21 |                      |                      | managing solicited and spontaneously reported     | particular study |
| 22 |                      |                      | adverse events and other unintended effects of    | design           |
| 23 |                      |                      | trial interventions or trial conduct              |                  |
| 24 |                      |                      |                                                   |                  |
| 25 |                      |                      |                                                   |                  |
| 26 |                      |                      |                                                   |                  |
| 27 |                      |                      |                                                   |                  |
| 28 |                      |                      |                                                   |                  |
| 29 |                      |                      |                                                   |                  |
| 30 | Auditing             | <a href="#">#23</a>  | Frequency and procedures for auditing trial       | N/A due to       |
| 31 |                      |                      | conduct, if any, and whether the process will be  | particular study |
| 32 |                      |                      | independent from investigators and the sponsor    | design           |
| 33 |                      |                      |                                                   |                  |
| 34 |                      |                      |                                                   |                  |
| 35 |                      |                      |                                                   |                  |
| 36 |                      |                      |                                                   |                  |
| 37 |                      |                      |                                                   |                  |
| 38 |                      |                      |                                                   |                  |
| 39 |                      |                      |                                                   |                  |
| 40 | <b>Ethics and</b>    |                      |                                                   |                  |
| 41 | <b>dissemination</b> |                      |                                                   |                  |
| 42 |                      |                      |                                                   |                  |
| 43 |                      |                      |                                                   |                  |
| 44 |                      |                      |                                                   |                  |
| 45 | Research ethics      | <a href="#">#24</a>  | Plans for seeking research ethics committee /     | 12-13            |
| 46 |                      |                      |                                                   |                  |
| 47 | approval             |                      | institutional review board (REC / IRB) approval   |                  |
| 48 |                      |                      |                                                   |                  |
| 49 |                      |                      |                                                   |                  |
| 50 |                      |                      |                                                   |                  |
| 51 |                      |                      |                                                   |                  |
| 52 |                      |                      |                                                   |                  |
| 53 |                      |                      |                                                   |                  |
| 54 |                      |                      |                                                   |                  |
| 55 |                      |                      |                                                   |                  |
| 56 |                      |                      |                                                   |                  |
| 57 |                      |                      |                                                   |                  |
| 58 |                      |                      |                                                   |                  |
| 59 |                      |                      |                                                   |                  |
| 60 |                      |                      |                                                   |                  |

|    |                    |                      |                                                      |              |
|----|--------------------|----------------------|------------------------------------------------------|--------------|
| 1  | Protocol           | <a href="#">#25</a>  | Plans for communicating important protocol           | 12-13 +      |
| 2  |                    |                      |                                                      |              |
| 3  | amendments         |                      | modifications (eg, changes to eligibility criteria,  | supplemental |
| 4  |                    |                      | outcomes, analyses) to relevant parties (eg,         | material     |
| 5  |                    |                      | investigators, REC / IRBs, trial participants, trial |              |
| 6  |                    |                      | registries, journals, regulators)                    |              |
| 7  |                    |                      |                                                      |              |
| 8  |                    |                      |                                                      |              |
| 9  |                    |                      |                                                      |              |
| 10 |                    |                      |                                                      |              |
| 11 |                    |                      |                                                      |              |
| 12 |                    |                      |                                                      |              |
| 13 | Consent or assent  | <a href="#">#26a</a> | Who will obtain informed consent or assent           | 12-13 +      |
| 14 |                    |                      | from potential trial participants or authorised      | supplemental |
| 15 |                    |                      | surrogates, and how (see Item 32)                    | material     |
| 16 |                    |                      |                                                      |              |
| 17 |                    |                      |                                                      |              |
| 18 |                    |                      |                                                      |              |
| 19 |                    |                      |                                                      |              |
| 20 |                    |                      |                                                      |              |
| 21 | Consent or assent: | <a href="#">#26b</a> | Additional consent provisions for collection and     | 12-13 +      |
| 22 |                    |                      | use of participant data and biological               | supplemental |
| 23 | ancillary studies  |                      | specimens in ancillary studies, if applicable        | material     |
| 24 |                    |                      |                                                      |              |
| 25 |                    |                      |                                                      |              |
| 26 |                    |                      |                                                      |              |
| 27 |                    |                      |                                                      |              |
| 28 |                    |                      |                                                      |              |
| 29 | Confidentiality    | <a href="#">#27</a>  | How personal information about potential and         | 12-13 +      |
| 30 |                    |                      | enrolled participants will be collected, shared,     | supplemental |
| 31 |                    |                      | and maintained in order to protect                   | material     |
| 32 |                    |                      | confidentiality before, during, and after the trial  |              |
| 33 |                    |                      |                                                      |              |
| 34 |                    |                      |                                                      |              |
| 35 |                    |                      |                                                      |              |
| 36 |                    |                      |                                                      |              |
| 37 |                    |                      |                                                      |              |
| 38 |                    |                      |                                                      |              |
| 39 | Declaration of     | <a href="#">#28</a>  | Financial and other competing interests for          | 14           |
| 40 |                    |                      | principal investigators for the overall trial and    |              |
| 41 | interests          |                      | each study site                                      |              |
| 42 |                    |                      |                                                      |              |
| 43 |                    |                      |                                                      |              |
| 44 |                    |                      |                                                      |              |
| 45 |                    |                      |                                                      |              |
| 46 | Data access        | <a href="#">#29</a>  | Statement of who will have access to the final       | 12-13 +      |
| 47 |                    |                      | trial dataset, and disclosure of contractual         | supplemental |
| 48 |                    |                      | agreements that limit such access for                | material     |
| 49 |                    |                      | investigators                                        |              |
| 50 |                    |                      |                                                      |              |
| 51 |                    |                      |                                                      |              |
| 52 |                    |                      |                                                      |              |
| 53 |                    |                      |                                                      |              |
| 54 |                    |                      |                                                      |              |
| 55 |                    |                      |                                                      |              |
| 56 |                    |                      |                                                      |              |
| 57 |                    |                      |                                                      |              |
| 58 |                    |                      |                                                      |              |
| 59 |                    |                      |                                                      |              |
| 60 |                    |                      |                                                      |              |

|    |                       |                      |                                                    |                   |
|----|-----------------------|----------------------|----------------------------------------------------|-------------------|
| 1  | Ancillary and post    | <a href="#">#30</a>  | Provisions, if any, for ancillary and post-trial   | N/A due to        |
| 2  |                       |                      |                                                    |                   |
| 3  | trial care            |                      | care, and for compensation to those who suffer     | particular study  |
| 4  |                       |                      |                                                    |                   |
| 5  |                       |                      | harm from trial participation                      | design            |
| 6  |                       |                      |                                                    |                   |
| 7  |                       |                      |                                                    |                   |
| 8  | Dissemination         | <a href="#">#31a</a> | Plans for investigators and sponsor to             | 13 + supplemental |
| 9  |                       |                      |                                                    |                   |
| 10 | policy: trial results |                      | communicate trial results to participants,         | material          |
| 11 |                       |                      |                                                    |                   |
| 12 |                       |                      | healthcare professionals, the public, and other    |                   |
| 13 |                       |                      |                                                    |                   |
| 14 |                       |                      | relevant groups (eg, via publication, reporting in |                   |
| 15 |                       |                      |                                                    |                   |
| 16 |                       |                      | results databases, or other data sharing           |                   |
| 17 |                       |                      |                                                    |                   |
| 18 |                       |                      | arrangements), including any publication           |                   |
| 19 |                       |                      |                                                    |                   |
| 20 |                       |                      | restrictions                                       |                   |
| 21 |                       |                      |                                                    |                   |
| 22 |                       |                      |                                                    |                   |
| 23 |                       |                      |                                                    |                   |
| 24 |                       |                      |                                                    |                   |
| 25 | Dissemination         | <a href="#">#31b</a> | Authorship eligibility guidelines and any          | Supplemental      |
| 26 |                       |                      |                                                    |                   |
| 27 | policy: authorship    |                      | intended use of professional writers               | material          |
| 28 |                       |                      |                                                    |                   |
| 29 |                       |                      |                                                    |                   |
| 30 |                       |                      |                                                    |                   |
| 31 | Dissemination         | <a href="#">#31c</a> | Plans, if any, for granting public access to the   | Supplemental      |
| 32 |                       |                      |                                                    |                   |
| 33 | policy: reproducible  |                      | full protocol, participant-level dataset, and      | material          |
| 34 |                       |                      |                                                    |                   |
| 35 | research              |                      | statistical code                                   |                   |
| 36 |                       |                      |                                                    |                   |
| 37 |                       |                      |                                                    |                   |
| 38 | <b>Appendices</b>     |                      |                                                    |                   |
| 39 |                       |                      |                                                    |                   |
| 40 |                       |                      |                                                    |                   |
| 41 | Informed consent      | <a href="#">#32</a>  | Model consent form and other related               | Supplemental      |
| 42 |                       |                      |                                                    |                   |
| 43 | materials             |                      | documentation given to participants and            | material          |
| 44 |                       |                      |                                                    |                   |
| 45 |                       |                      | authorised surrogates                              |                   |
| 46 |                       |                      |                                                    |                   |
| 47 |                       |                      |                                                    |                   |
| 48 |                       |                      |                                                    |                   |
| 49 | Biological            | <a href="#">#33</a>  | Plans for collection, laboratory evaluation, and   | N/A due to study  |
| 50 |                       |                      |                                                    |                   |
| 51 | specimens             |                      | storage of biological specimens for genetic or     | design            |
| 52 |                       |                      |                                                    |                   |
| 53 |                       |                      |                                                    |                   |
| 54 |                       |                      | molecular analysis in the current trial and for    |                   |
| 55 |                       |                      |                                                    |                   |
| 56 |                       |                      | future use in ancillary studies, if applicable     |                   |
| 57 |                       |                      |                                                    |                   |
| 58 |                       |                      |                                                    |                   |
| 59 |                       |                      |                                                    |                   |
| 60 |                       |                      |                                                    |                   |

1 None The SPIRIT checklist is distributed under the terms of the Creative Commons Attribution  
2 License CC-BY-ND 3.0. This checklist can be completed online using <https://www.goodreports.org/>, a  
3 tool made by the [EQUATOR Network](#) in collaboration with [Penelope.ai](#)  
4  
5  
6  
7  
8  
9  
10

11 **NOTE: The original protocol approved by the competent Ethics Committee (in English language) has**  
12 **been uploaded as Supplemental Material.**  
13  
14  
15  
16  
17  
18  
19  
20  
21  
22  
23  
24  
25  
26  
27  
28  
29  
30  
31  
32  
33  
34  
35  
36  
37  
38  
39  
40  
41  
42  
43  
44  
45  
46  
47  
48  
49  
50  
51  
52  
53  
54  
55  
56  
57  
58  
59  
60

# BMJ Open

## Implementation of a strategy involving a multidisciplinary mobile unit team to prevent hospital admission in nursing home residents: protocol of a quasi-experimental study (MMU-1 Study)

|                                 |                                                                                                                                                                                                                                                                                                                                                                                                                                                                                                                                                                                                                                                                                                                                                                                                                                                                                                                                                                                                                                                                                                                                                                                                                                                                                                                                                                                            |
|---------------------------------|--------------------------------------------------------------------------------------------------------------------------------------------------------------------------------------------------------------------------------------------------------------------------------------------------------------------------------------------------------------------------------------------------------------------------------------------------------------------------------------------------------------------------------------------------------------------------------------------------------------------------------------------------------------------------------------------------------------------------------------------------------------------------------------------------------------------------------------------------------------------------------------------------------------------------------------------------------------------------------------------------------------------------------------------------------------------------------------------------------------------------------------------------------------------------------------------------------------------------------------------------------------------------------------------------------------------------------------------------------------------------------------------|
| Journal:                        | <i>BMJ Open</i>                                                                                                                                                                                                                                                                                                                                                                                                                                                                                                                                                                                                                                                                                                                                                                                                                                                                                                                                                                                                                                                                                                                                                                                                                                                                                                                                                                            |
| Manuscript ID                   | bmjopen-2019-034742.R2                                                                                                                                                                                                                                                                                                                                                                                                                                                                                                                                                                                                                                                                                                                                                                                                                                                                                                                                                                                                                                                                                                                                                                                                                                                                                                                                                                     |
| Article Type:                   | Protocol                                                                                                                                                                                                                                                                                                                                                                                                                                                                                                                                                                                                                                                                                                                                                                                                                                                                                                                                                                                                                                                                                                                                                                                                                                                                                                                                                                                   |
| Date Submitted by the Author:   | 28-Jan-2020                                                                                                                                                                                                                                                                                                                                                                                                                                                                                                                                                                                                                                                                                                                                                                                                                                                                                                                                                                                                                                                                                                                                                                                                                                                                                                                                                                                |
| Complete List of Authors:       | Nouvenne, Antonio; Azienda Ospedaliero-Universitaria di Parma, Geriatric-Rehabilitation Department<br>Caminiti, Caterina; Azienda Ospedaliero-Universitaria di Parma, Research and Innovation Unit<br>Diodati, Francesca; Azienda Ospedaliero-Universitaria di Parma, Research and Innovation Unit<br>Iezzi, Elisa; Azienda Ospedaliero-Universitaria di Parma, Research and Innovation Unit<br>Prati, Beatrice; Azienda Ospedaliero-Universitaria di Parma, Geriatric-Rehabilitation Department<br>Lucertini, Stefano; Azienda Unità Sanitaria Locale di Parma, Primary Care Department<br>Schianchi, Paolo; Azienda Unità Sanitaria Locale di Parma, Primary Care Department<br>Pascale, Federica; Azienda Unità Sanitaria Locale di Parma, Primary Care Department<br>Starcich, Bruno; Azienda Unità Sanitaria Locale di Parma, Primary Care Department<br>Manotti, Pietro; Azienda Ospedaliero-Universitaria di Parma, Medical Direction<br>Brianti, Ettore; Azienda Ospedaliero-Universitaria di Parma, Medical Direction<br>Fabi, Massimo; Azienda Ospedaliero-Universitaria di Parma, General Manager<br>Ticinesi, Andrea; Azienda Ospedaliero-Universitaria di Parma, Geriatric-Rehabilitation Department<br>Meschi, Tiziana; Azienda Ospedaliero-Universitaria di Parma, Geriatric-Rehabilitation Department; Università degli studi di Parma, Department of Medicine and Surgery |
| <b>Primary Subject Heading</b>: | Geriatric medicine                                                                                                                                                                                                                                                                                                                                                                                                                                                                                                                                                                                                                                                                                                                                                                                                                                                                                                                                                                                                                                                                                                                                                                                                                                                                                                                                                                         |
| Secondary Subject Heading:      | General practice / Family practice, Emergency medicine                                                                                                                                                                                                                                                                                                                                                                                                                                                                                                                                                                                                                                                                                                                                                                                                                                                                                                                                                                                                                                                                                                                                                                                                                                                                                                                                     |
| Keywords:                       | Organisation of health services < HEALTH SERVICES ADMINISTRATION & MANAGEMENT, Quality in health care < HEALTH SERVICES ADMINISTRATION & MANAGEMENT, GERIATRIC MEDICINE                                                                                                                                                                                                                                                                                                                                                                                                                                                                                                                                                                                                                                                                                                                                                                                                                                                                                                                                                                                                                                                                                                                                                                                                                    |

1  
2  
3  
4  
5  
6  
7  
8  
9  
10  
11  
12  
13  
14  
15  
16  
17  
18  
19  
20  
21  
22  
23  
24  
25  
26  
27  
28  
29  
30  
31  
32  
33  
34  
35  
36  
37  
38  
39  
40  
41  
42  
43  
44  
45  
46  
47  
48  
49  
50  
51  
52  
53  
54  
55  
56  
57  
58  
59  
60



SCHOLARONE™  
Manuscripts





I, the Submitting Author has the right to grant and does grant on behalf of all authors of the Work (as defined in the below author licence), an exclusive licence and/or a non-exclusive licence for contributions from authors who are: i) UK Crown employees; ii) where BMJ has agreed a CC-BY licence shall apply, and/or iii) in accordance with the terms applicable for US Federal Government officers or employees acting as part of their official duties; on a worldwide, perpetual, irrevocable, royalty-free basis to BMJ Publishing Group Ltd ("BMJ") its licensees and where the relevant Journal is co-owned by BMJ to the co-owners of the Journal, to publish the Work in this journal and any other BMJ products and to exploit all rights, as set out in our [licence](#).

The Submitting Author accepts and understands that any supply made under these terms is made by BMJ to the Submitting Author unless you are acting as an employee on behalf of your employer or a postgraduate student of an affiliated institution which is paying any applicable article publishing charge ("APC") for Open Access articles. Where the Submitting Author wishes to make the Work available on an Open Access basis (and intends to pay the relevant APC), the terms of reuse of such Open Access shall be governed by a Creative Commons licence – details of these licences and which [Creative Commons](#) licence will apply to this Work are set out in our licence referred to above.

Other than as permitted in any relevant BMJ Author's Self Archiving Policies, I confirm this Work has not been accepted for publication elsewhere, is not being considered for publication elsewhere and does not duplicate material already published. I confirm all authors consent to publication of this Work and authorise the granting of this licence.

1     **1     Implementation of a strategy involving a multidisciplinary mobile unit team to prevent hospital**  
2  
3     **2     admission in nursing home residents: protocol of a quasi-experimental study (MMU-1 Study)**  
4  
5  
6     **3**

7     Antonio Nouvenne<sup>1</sup>, Caterina Caminiti<sup>2</sup>, Francesca Diodati<sup>2</sup>, Elisa Iezzi<sup>2</sup>, Beatrice Prati<sup>1</sup>, Stefano Lucertini<sup>3</sup>,  
8  
9     Paolo Schianchi<sup>3</sup>, Federica Pascale<sup>3</sup>, Bruno Starcich<sup>3</sup>, Pietro Manotti<sup>4</sup>, Ettore Brianti<sup>4</sup>, Massimo Fabi<sup>5</sup>,  
10  
11     Andrea Ticinesi<sup>1\*</sup>, Tiziana Meschi<sup>1,6</sup>  
12  
13  
14  
15

16     <sup>1</sup>Geriatric Rehabilitation Department, Azienda Ospedaliero-Universitaria di Parma, Via Antonio Gramsci 14,  
17  
18     43126 Parma, Italy  
19

20     <sup>2</sup>Research and Innovation Unit, Azienda Ospedaliero-Universitaria di Parma, Via Antonio Gramsci 14,  
21  
22     43126 Parma, Italy  
23

24     <sup>3</sup>Primary Care Department, Azienda Unità Sanitaria Locale di Parma, Strada del Quartiere 2/A, 43125  
25  
26     Parma, Italy  
27

28     <sup>4</sup>Medical Direction, Azienda Ospedaliero-Universitaria di Parma, Via Antonio Gramsci 14, 43126 Parma,  
29  
30     Italy  
31

32     <sup>5</sup>General Manager, Azienda Ospedaliero-Universitaria di Parma, Via Antonio Gramsci 14, 43126 Parma,  
33  
34     Italy  
35  
36

37     <sup>6</sup>Department of Medicine and Surgery, University of Parma, Via Antonio Gramsci 14, 43126 Parma, Italy  
38  
39  
40  
41  
42

43     **Corresponding author:**

44  
45  
46     \*Andrea Ticinesi, MD, PhD, Geriatric-Rehabilitation Department, Parma University-Hospital (Azienda  
47  
48     Ospedaliero-Universitaria di Parma), via Antonio Gramsci 14, 43126 Parma, Italy.  
49

50  
51     Work Telephone number: 0039-0521703871; Mobile: 00393471845191; Fax: 0039-0521702383  
52

53     E-mail address: [aticinesi@ao.pr.it](mailto:aticinesi@ao.pr.it)  
54

55     **Word count:** 3732  
56

57     **Abstract:** 300; **Tables:** 1; **Figures:** 2; **References:** 31  
58

59     **Running Title:** Multidisciplinary mobile unit intervention for nursing homes  
60

## 1 ABSTRACT

2  
3 **Introduction-** Nursing home residents represent a particularly vulnerable population experiencing high risk  
4  
5 of unplanned hospital admissions, but few interventions have proved effective in reducing this risk. The aim  
6  
7 of this research will be to verify the effects of a hospital-based multidisciplinary mobile unit (MMU) team  
8  
9 intervention delivering urgent care to nursing home residents directly at their bedside.

10  
11 **Methods and analysis-** Four nursing homes based in the Parma province, in Northern Italy, will be involved  
12  
13 in this prospective, pragmatic, multicenter, 18-month quasi-experimental study (sequential design with two  
14  
15 cohorts). The residents of two nursing homes will receive the MMU team care intervention. In case of urgent  
16  
17 care needs, the nursing home physician will contact the hospital physician responsible for the MMU team by  
18  
19 phone. The case will be triaged as a) manageable by phone advice, b) requiring urgent assessment by the MMU  
20  
21 team or c) requiring immediate ED referral. MMU team is composed of one senior physician and one  
22  
23 Emergency-Medicine resident chosen within the staff of Internal Medicine and Critical Subacute Care Unit of  
24  
25 Parma University-Hospital, usually with different specialty background, and equipped with portable  
26  
27 ultrasound, set of drugs and devices useful in urgency. The MMU visits patients in nursing homes, with the  
28  
29 mission to stabilize clinical conditions and avoid hospital admission. Residents of the other two nursing homes  
30  
31 will receive usual care, i.e. ED referral in every case of urgency. Study endpoints include unplanned hospital  
32  
33 admissions (primary), crude all-cause mortality, hospital mortality, length of stay and healthcare-related costs  
34  
35 (secondary).  
36  
37  
38

39 **Ethics and dissemination-** The study protocol was approved by the Ethics Committee of Area Vasta Emilia  
40  
41 Nord (Emilia-Romagna region). Informed consent will be collected from patients or legal representatives. The  
42  
43 results will be actively disseminated through peer-reviewed journals and conference presentations, in  
44  
45 compliance with the Italian law.  
46  
47

48 **Registration ID-** ClinicalTrials.gov NCT 04085679  
49  
50

51  
52 **Key words:** multimorbidity; geriatrics; hospitalization; multidisciplinary care; hospital-community  
53  
54 partnership  
55  
56  
57  
58  
59  
60

1  
2  
3  
4  
5  
6  
7  
8  
9  
10  
11  
12  
13  
14  
15  
16  
17  
18  
19  
20  
21  
22  
23  
24  
25  
26  
27  
28  
29  
30  
31  
32  
33  
34  
35  
36  
37  
38  
39  
40  
41  
42  
43  
44  
45  
46  
47  
48  
49  
50  
51  
52  
53  
54  
55  
56  
57  
58  
59  
60

## 1    1    **STRENGTHS AND LIMITATIONS OF THIS STUDY**

- 2            2            ✓ This study will explore the effectiveness of a complex intervention focused on the avoidance of
- 3            3            hospital admissions for nursing home residents, with a strong hospital-community partnership.
- 4            4            ✓ The study intervention consists in bringing specialist hospital care directly at the bedside of nursing
- 5            5            home residents, an innovative approach not previously described in the scientific literature.
- 6            6            ✓ The intervention has been developed considering the organization of the Italian healthcare system, but
- 7            7            is reproducible and applicable in other settings.
- 8            8            ✓ Due to ethical concerns and the complex nature of the intervention, individual randomization of
- 9            9            participants is not possible.
- 10           10           ✓ The quasi-experimental design of the study allows an optimal compromise between soundness and
- 11           11           feasibility, facilitating the transferability of results into clinical practice.

## 1 INTRODUCTION

2 The increasing clinical complexity of older medical patients, due to multimorbidity, polypharmacy, frailty,  
3 disability and social hardship, is challenging for health care systems.<sup>1 2</sup> These characteristics are emphasized  
4 in nursing home residents, who experience a particularly high risk of Emergency Department (ED) visits and  
5 hospitalization (greater than 20% per year).<sup>3-8</sup> In the ED, these patients may experience misdiagnoses and  
6 undertreatment, due to their complexity and atypical presentation of acute illness, and contribute to the  
7 overcrowding phenomenon.<sup>4 5 9-11</sup> Once admitted to wards, they are also more likely to have long stays (>2  
8 weeks)<sup>9</sup> and experience hospital-related complications.<sup>12</sup> Additionally, when they are discharged back to  
9 nursing homes, they may experience further adverse events related to care transitions.<sup>6 12</sup>

10 In the light of these considerations, confirmed by large cohort studies conducted in the United States and  
11 Canada,<sup>7 8</sup> a number of approaches have been developed to reduce the risk of hospitalization in nursing home  
12 residents. These are summarized in the systematic review by Santosaputri et al,<sup>13</sup> which includes quantitative  
13 comparative studies of all designs aiming to determine the efficacy of interventions provided by geriatric health  
14 professionals. Sixteen studies were eligible, of which 6 randomized controlled trials, involving an estimated  
15 total of over 7400 patients. The authors of the review categorized 14 intervention programs into three primary  
16 approaches (two did not fit in any category):

- 17 - Prevention approach (nine studies): Interventions (such as direct review of patients, telemedicine,  
18 comprehensive geriatric assessment) delivered in the nursing home by nurses, physicians, and  
19 sometimes allied health personnel to prevent hospitalization of residents
- 20 - Emergency department-based hospital avoidance (three studies): interventions provided by nursing  
21 staff (such as wound care or catheter management) targeting nursing home residents during ED visits
- 22 - Post-hospital supported discharge (two studies): Interventions designed to support residents in the care  
23 transition from the hospital to nursing home, including geriatrician and nurse review in the facility and  
24 standardized rehabilitation programs.

25 Although the majority of the studies reported reductions in hospitalizations, only six, with different designs  
26 and interventions, obtained statistically significant findings.<sup>14-19</sup> Two of these studies, with retrospective  
27 design, involved delivery of routine care to nursing home residents by hospital-based nursing staff, with the  
28 possibility of obtaining support from a geriatrician in case of urgent situations.<sup>14-15</sup> In another prospective  
29 quasi-experimental study, a team including a geriatrician and specialized nurses supported the nursing home

1 physician in delivering routine care and in managing urgent clinical situations.<sup>16</sup> The remaining three studies,  
2 all with prospective quasi-experimental design, were more focused on selected clinical scenarios, involving  
3 advice and education by ED staff to nursing home personnel after ED admission of residents,<sup>17</sup> hospital nurse  
4 visits in the nursing home to implement strategies of delirium prevention,<sup>18</sup> and rehabilitation intervention  
5 delivered by a geriatric orthopedic team to residents with hip fracture.<sup>19</sup>  
6 Unfortunately, the quality of evidence was considered low to moderate, therefore further, well-designed studies  
7 are needed to identify which interventions are effective in reducing hospitalization in the older residents.<sup>13</sup> The  
8 interventions performed in the existing studies were also mainly focused on routine care, while a prompt and  
9 correct management of urgent situations and acute/subacute conditions may be fundamental for avoiding ED  
10 admissions in nursing home residents.<sup>7,20</sup> Namely, interventions delivering urgent care with a multidisciplinary  
11 approach, based not only on geriatric expertise but also on the capacity of performing first line diagnostic  
12 examinations, such as ultrasonography, and basic invasive procedures, such as central venous line or  
13 nasogastric tube insertion, have a great potential of being successful in reducing ED visits, but have not been  
14 adequately investigated to date.<sup>7,20</sup>  
15 At our institution, different projects have been carried out for many years to improve care of the elderly,  
16 primarily targeting hospital organization, with the main objective to reduce unnecessary, avoidable length of  
17 stay (LOS).<sup>21-23</sup> These efforts benefit in-hospital patients, but are not designed to prevent hospitalizations. In  
18 this framework, based on literature evidence, best current knowledge and long-time experience with elderly  
19 care developed at our university-hospital, we hypothesize that a complex intervention delivered in nursing  
20 homes, where vulnerable high-risk patients live, involving direct patient care by hospital medical staff with  
21 multidisciplinary approach grounded on geriatric expertise, may reduce hospitalization of residents.

## 24 **METHODS AND ANALYSIS**

### 25 **Study setting**

26 The study is based in the University Hospital of Parma, which has a catchment area of more than 400,000  
27 inhabitants, of whom 22.3% is over 65 years old. It provides the only Emergency service of the district, and it  
28 ranks fourth in Italy by number of ED visits (yearly average of over 110,000). The average admission rate of  
29 the adult ED population is 18%, of which 65% concern people older than 65.

1 In the last two decades, the University Hospital of Parma has implemented several innovative initiatives to  
2 manage the hospital flow of frail multimorbid patients and their complex needs. These initiatives included bed  
3 management to avoid “bed-blockers”,<sup>21</sup> physician accountability for the discharge process,<sup>22</sup> and creation of a  
4 dedicated hospital unit, organized by intensity of care to anticipate the needs of these patients preserving high  
5 performance indices.<sup>23</sup> The Multidisciplinary Mobile Unit (MMU) team will be based in this unit, called  
6 Internal Medicine and Critical Subacute Care.

7 Nursing homes participating in the study are public facilities of similar size (90-100 residents) which ensure  
8 the presence of nursing staff 24 hours a day and of a physician at least 4 hours a day (high-intensity care  
9 facilities), in compliance with the care standards set by the Local Health Authority. No staff member is shared  
10 among the participating nursing homes. The possible role of distance to the hospital is considered by including  
11 in each group one nursing home located next to the hospital and one located at a distance of >5 km.

12 The participating nursing homes are the following CRAs (Casa Residenza Anziani):

- 13 - C.R.A. “I Tigli” Parma (intervention group)
- 14 - C.R.A. “Casa degli Anziani”, Collecchio (intervention group)
- 15 - C.R.A. “Le Tamerici” Parma (control group)
- 16 - C.R.A. “Ines Ubaldi”, Parma (control group)

17 This study follows a multimethod approach, based on the Medical Research Council framework for developing  
18 and evaluating complex interventions,<sup>24</sup> including the development, feasibility assessment, and evaluation  
19 phases.

### 21 **Development of the intervention**

22 First, the different types of approaches reported in the literature, described above, were considered.<sup>13</sup> The  
23 “prevention approach”, interventions conducted in nursing homes, was chosen as the most suitable strategy to  
24 integrate the hospital’s organizational model already in place, as it can target both hospitalization rates and ED  
25 overcrowding, allowing to intervene before the person accesses the hospital.

26 Available evidence also prompted us to opt for a multicomponent approach. In fact, the current literature,  
27 mainly based on qualitative interviews with nursing home staff members in different countries, suggests that  
28 the decision to transfer residents to hospital may be influenced by different factors, such as staffing and skill  
29 mix in the nursing homes, treatment options available in the facility, end-of-life decision-making, and

1 1 communication and bureaucratic requirements.<sup>25</sup> This multifactorial association means that a multicomponent  
2 2 intervention is likely to be more effective than a single-component intervention.<sup>26</sup>

3 3 Based on the Schippinger<sup>16</sup> and Diaz-Gegundez<sup>27</sup> studies, that obtained significant reduction of hospital  
4 4 admissions, we created a mobile physician service. Unlike those studies, we did not involve a nurse, because  
5 5 the participating facilities have nursing staff available 24 hours a day, and we used medical hospital staff  
6 6 because routine clinical management and scheduled follow-up evaluations are already performed by nursing  
7 7 home physicians during their office hours.

8 8 Finally, medical hospital staff was preferred to community geriatricians, on the assumption that older patients  
9 9 may feel more comfortable being handled by physicians who may have already cared for them at the hospital.  
10 10 Moreover, hospital staff enables direct patient referral to the ward. Finally, this allows the use of diagnostic  
11 11 technologies available at the hospital, which can be used immediately without the need for hospital admission.

12 12

### 13 **Description of the intervention**

14 14 The model hinges on the strong collaboration between hospital and nursing home staff to provide residents  
15 15 with patient-centered care. It entails a multicomponent intervention which is integrated in standard care and  
16 16 comprises three steps: 1) MMU team activation, 2) on site visit by a team of physicians with geriatric expertise,  
17 17 3) interdisciplinary care planning (Figure 1).

18 18

#### 19 *Step 1: MMU team activation*

20 20 Patient selection is necessary to ensure that available resources are used for patients who may really benefit.  
21 21 To this end, the nursing home physician contacts by phone the “flow manager”, a skilled internist with strong  
22 22 clinical expertise, organizational attitude and managerial training, during the 8 a.m.-6 p.m. time frame, Monday  
23 23 to Friday. The phone consultation is reported on a form containing the description of the patient’s clinical  
24 24 condition and a summary of the conversation. The form also indicates which decision was reached among the  
25 25 following six not mutually exclusive options:

- 26 26 a) The patient can be managed by nursing home staff, therapeutic advice is provided by phone
- 27 27 b) Remote reassessment is scheduled after a number of hours agreed upon by the team
- 28 28 c) The MMU team is dispatched for evaluation, treatment and stabilization on site

29 29

30 30



- 1  
2 1 d) A significant change in vital parameters is observed which requires immediate activation of emergency  
3  
4 2 services  
5  
6 3 e) Direct hospital admission is considered necessary  
7  
8 4 f) Ambulatory outpatient visits or tests are planned  
9

10 5  
11  
12 6 *Step 2: on site visit by a team of physicians with geriatric expertise*

13  
14 7 Visits at the nursing home are performed by two members of the MMU team: an expert hospital physician  
15  
16 8 chosen on a case-by-case basis among the clinical staff of the Internal Medicine and Critical Subacute Care  
17  
18 9 Unit, depending on the disease or clinical problem that must be treated, and a specifically trained resident in  
19  
20 10 Emergency Medicine. The physicians that may be involved in MMU activation include specialists in internal  
21  
22 11 medicine, clinical ultrasonography, gastroenterology, geriatrics or clinical nutrition.

23  
24 12 The team is provided with a car to reach the nursing homes, a portable ultrasound system, and an essential set  
25  
26 13 of drugs and medical devices useful in an emergency setting. The ultrasound system is equipped with three  
27  
28 14 probes (convex, linear, and phased-array) for performing thoraco-pulmonary, cardiac, vascular, abdominal and  
29  
30 15 soft tissue ultrasound, when required. Available drugs include those that can be administered intravenously for  
31  
32 16 treating urgent conditions (e.g. loop diuretics, steroids, fluids, antibiotics). Devices include central and  
33  
34 17 peripheral venous lines, naso-gastric and rectal tubes and bladder catheters. Blood tests can also be performed.  
35  
36 18 Table 1 shows possible clinical scenarios which may require MMU team activation, and possible decisions.  
37  
38 19

39  
40  
41 20 *Step 3: interdisciplinary care planning*

42  
43 21 Based on the results of the visit and of any performed investigations, the MMU team formulates personalized  
44  
45 22 advice and referrals, and discusses these with the nursing home physician. If stabilization on site is not deemed  
46  
47 23 possible, the MMU team plans a direct admission to the Internal Medicine and Critical Subacute Care Unit,  
48  
49 24 thus avoiding ED access. The planning and the final outcome of the intervention are recorded in the second  
50  
51 25 part of the form.  
52  
53 26

54  
55  
56 27 **Feasibility assessment**

57  
58 28 A pilot phase of 5 months (December 2018-April 2019) was conducted in the two nursing homes participating  
59  
60 29 to the study as intervention group, in order to look at feasibility of the MMU care Model described above.

1 1 Before the intervention was introduced, meetings were held with nursing home staff to agree on activation  
2 2 modalities.

3 3 In this period, 99 phone calls were received, of which 84 required MMU team onsite visits, and 15 were  
4 4 managed with remote consultancy. Of the latter, 3 required direct admission after remote phone consultancy.

5 5 Only 4 of the 84 patients visited onsite required direct admission. One patient was sent to the ED for massive  
6 6 intestinal bleeding (Figure 2).

7 7 This phase demonstrated the feasibility of the intervention, and did not highlight any need for modifications.

8 8

## 9 **Evaluation phase (current study)**

### 10 *Aim and objectives*

11 11 The study aim is to verify the effects of the implementation of the MMU care model tested in the pilot phase.

12 12 Primary objective is to verify reduction of unplanned hospitalization rates in the nursing homes of the  
13 13 intervention group compared to the nursing homes in the control group. Secondary objectives are to measure  
14 14 the effects of the intervention in terms of crude all-cause mortality, hospital mortality, length of stay and  
15 15 healthcare-related costs.

16 16

### 17 *Study Design*

18 18 This study is a prospective, pragmatic, cluster-multicenter, quasi-experimental study (sequential design with  
19 19 two cohorts), in which usual nursing home care is compared to care provided by applying the MMU model.

20 20 The cluster design was selected because the intervention is organizational and requires high involvement of all  
21 21 center staff; therefore, randomizing individual clinicians or patients would entail a high risk of contamination  
22 22 bias. A quasi-randomized design was chosen as it prevents the need to discontinue the intervention conducted  
23 23 in two nursing homes which had participated in the pilot phase, and would thus be more acceptable by staff.

24 24 Furthermore, quasi-experiments do not imply the selection effects and “artificiality” of randomized trials, and  
25 25 are thus more suitable for studies on intervention implementation in real life, enabling a high degree of external  
26 26 validity.<sup>28</sup>

27 27

### 28 *Study Population*

29 29

30 30

1 All residents staying in the participating nursing homes at the moment of study initiation or admitted afterwards  
2 are eligible for inclusion, regardless of their clinical status. Informed consent will be collected from patients  
3 or their proxies/legal representatives, according to the European Union law. Refusal to provide informed  
4 consent, either by patients or legal representatives, will imply study exclusion.

#### 6 *Usual Care*

7 Patients in the control cohort receive usual care, which means the actions to take are decided by the nursing  
8 home staff. Generally, this implies that patients who are clinically unstable, or require urgent instrumental  
9 tests, will be sent to the ED.

#### 11 *Measures: Baseline variables*

12 Demographic data on gender and age are collected by chart review.

#### 14 *Measures: Outcome variables*

15 The primary outcome is hospitalization rate, considering at the numerator all unplanned admissions occurred  
16 during a 1-year period, and at the denominator the sum of the person-time of the at risk population (days of  
17 stay at the nursing home). For the intervention group, the numerator corresponds to options d) and e) defined  
18 in “Step 1: MMU team activation” (activation of Emergency services and direct hospital admission).

19 The secondary outcomes are the following:

- 20 - Crude all-cause Death Rate (CDR): the number of deaths during 1-year period on person-time of the  
21 at risk population
- 22 - Hospital Mortality rate: the frequency of patients who die while in the hospital (death rate/1000)
- 23 - Length of stay (LOS): the duration of a single episode of hospitalization. Inpatient days are calculated  
24 by subtracting day of admission from day of discharge.
- 25 - Adverse events or complications: frequency of events with novel unexpected worsening of clinical  
26 conditions, defined as alterations of vital signs, occurring within 48 hours from MMU team activation,  
27 for which hospital access becomes necessary.
- 28 - Costs analysis, comparing the cost differences in the two groups

## 1 *Data Collection*

2  
3 2 Patient demographic and clinical characteristics will be collected at baseline from nursing home clinical  
4  
5 3 records to describe the study population and determine hospital admission rate. For participants in the control  
6  
7 4 group, only data on age, sex, timing of admission and discharge in nursing home will be collected. For those  
8  
9 5 in the intervention group, additional data on any MMU activation (reasons, timing, intervention, procedures  
10  
11 6 and outcomes) will be collected with a specific Case Report Form (CRF).  
12  
13 7 Participants' files and electronic data will be stored securely at the study site (e.g. locked area, password  
14  
15 8 protected hard- and software). Data integrity will be scrutinized with several strategies (e.g. valid values, range  
16  
17 9 checks, consistency checks). Patient data will be only identifiable with the unique participant's number.  
18  
19 10 Personal information will be collected and saved in a separate file (on a different server) which can only be  
20  
21 11 accessed by the Principal Investigator (PI). For the primary outcome, information will be obtained using  
22  
23 12 administrative databases of the hospital and nursing homes. For secondary outcomes the following data sources  
24  
25 13 will be used: validated regional death registry to determine CDR; electronic discharge summaries to calculate  
26  
27 14 hospital mortality rate and LOS; electronic ED registry to detect adverse events or complications; hospital  
28  
29 15 administrative database and CRF for the cost analysis. Residents' identification data will be deleted once the  
30  
31 16 study is completed, making the dataset anonymous. All study protocol authors will have access to the  
32  
33 17 anonymous dataset.  
34  
35  
36  
37  
38

## 39 *Study duration*

40  
41 20 Overall expected duration is 18 months, with study initiation presumably in January 2020 and completion in  
42  
43 21 June 2021.  
44  
45  
46  
47

## 48 **Statistical Methodology**

### 49 *Sample size calculation*

50  
51 25 The number of subjects to include was estimated using the findings of Diaz-Gegundez et al, who performed a  
52  
53 26 large quasi-experimental trial.<sup>27</sup> Thus, considering 56 cases vs 32 cases per 100 residents, and using a 2-sided,  
54  
55 27 large-samples z-test of the Poisson incidence rate difference at a significance level of 0.05, and with a power  
56  
57 28 of 0.90, overall 338 residents should be enrolled. Since each of the participating nursing homes has between  
58  
59 29 90 and 100 residents, the study appears as feasible.  
60

1

2

3

4

5

6

7

8

9

10

11

12

13

14

15

16

17

18

19

20

21

22

23

24

25

26

27

28

29

30

31

32

33

34

35

36

37

38

39

40

41

42

43

44

45

46

47

48

49

50

51

52

53

54

55

56

57

58

59

60

29

## *Statistical analysis plan*

Descriptive statistics will be used to summarize patient populations and will be presented as means and standard deviations (SD) when normally distributed, or as medians and interquartile ranges (IQR).

For the primary analysis we will use Poisson regression with robust standard errors (SEs) to evaluate relative differences in hospital rates among our two cohorts while adjusting for demographic characteristics.

Concerning the secondary outcomes, the following analyses will be performed:

- Rates will be compared considering the quotient between the intervention and control groups
- A lognormal model will be used to compare in-hospital LOS.
- Chi square tests will be conducted for categorical data as adverse events or complications

The demographic and clinical variables which influence the outcome with a p value < 0.20 in the univariate analysis will be included in the Poisson regression model.

Finally, cost analysis will be performed. We will identify the changes in net costs associated with one-year exposure to the intervention, consisting in the induced costs due to incremental resource inputs for carrying out the intervention and hospital health service utilization costs. Staffing costs will be calculated considering the time spent by the professionals involved in the intervention. Non-staff running costs include expenses of MMU staff travelling to and from the nursing home. The health service utilization costs will be identified based on the standard regional tariffs assigned to each admission according to the Diagnosis Related Group (DRG) system. We will use the following equations to summarize the annual net costs associated with the implementation of the intervention. Any costs with negative values mean “savings” and any costs with positive values mean “losses”. Net costs = A (intervention costs) ± B (Costs for differences in hospital health service utilization) where: A = intervention: staffing costs + intervention: non-staff costs and B = Costs for differences in inpatient care utilization. Therefore, the net costs arising from one-year implementation of the intervention as compared with the current practice will be obtained, where a negative value of net costs represents “cost-saving” and a positive value represents “not cost-saving”

The analyses will be performed using SAS 8.2 (SAS Institute, Cary, NC, USA) and STATA-SE 11 (Stata Corp LP, College Station, TX, USA).

## **Patient and public involvement**

1 1 No patient involved.

2  
3 2

### 4 3 **ETHICS AND DISSEMINATION**

5 4 The study will be conducted in compliance with the principles of the revision of the Helsinki Declaration and  
6 5 by current legislation on scientific research. All participants or their legal representatives will sign informed  
7 6 consent form. This study does not entail any experimental pharmacological treatment, or changes in the  
8 7 diagnostic-therapeutic pathway. Eligible patients, or their legal representatives, will be also asked to give  
9 8 written consent to handling of their personal data. If a patient wishes to discontinue his/her participation in the  
10 9 study, it is the responsibility of the investigator to ensure that no further data regarding the person's health  
11 10 condition shall be collected. All collected data will be used in the final analysis.

12 11 All data collected, handled and stored for the purpose of this study will be kept confidential at any time and  
13 12 will be securely stored, as required in GCP guidelines and in current privacy legislation.

14 13

15 14

### 16 15 **DISCUSSION**

17 16 The MMU-1 Study will represent one of the first attempts to prevent hospital admissions of nursing home  
18 17 residents by using a multicomponent complex intervention with a strong multidisciplinary approach. Most of  
19 18 previous studies in this field were in fact focused on geriatric routine care, nurse counselling and education,  
20 19 but did not deliver diagnostic and therapeutic interventions at the bedside in case of urgent needs.<sup>13-19,27</sup> The  
21 20 multidisciplinary skills of MMU-1 staff, that may involve expert physicians with different skills and  
22 21 background depending on the clinical problem of patients, represents a novelty at the current literature state-  
23 22 of-the-art and has a great potential of being successful in preventing hospital admission, considering the high  
24 23 clinical complexity of nursing home residents. The use of bedside ultrasound equipment also represents a high  
25 24 value added to the care of these patients, allowing to reach a high diagnostic accuracy and to perform invasive  
26 25 procedures without moving patients to the hospital.<sup>29-30</sup> The use of bedside ultrasonography in geriatrics is  
27 26 becoming increasingly popular but is generally unavailable in nursing homes.<sup>29-30</sup> When integrated with an  
28 27 accurate physical examination, bedside ultrasonography can dramatically improve the diagnostic process,<sup>31</sup>  
29 28 especially in geriatric multimorbid patients where severity of symptoms, cognitive impairment and mobility-  
30 29 limitations may reduce the accuracy of traditional imaging.<sup>29-30</sup>

1 Finally, the MMU-1 intervention is not fixed into a rigid algorithm, but different kinds of consultancy can be  
2 made according to the clinical situation of each patient (Figure 1). This circumstance represents an  
3 advancement with respect of other interventions previously described in the literature,<sup>13</sup> and an effort towards  
4 personalization of geriatric care. Even in the two studies by Schippinger<sup>16</sup> and Diaz-Gegundez<sup>27</sup> reporting a  
5 significant reduction of hospital admissions, the intervention was rather fixed, centered exclusively on  
6 comprehensive geriatric assessment and lacked technological support such as bedside ultrasound.

7 Some limitations of this study should be considered. First, we acknowledge that the stepped wedge cluster  
8 randomized design would represent the best design for testing the effects of a novel care model implemented  
9 in multiple nursing homes. However, this was not feasible due to practical and economic barriers. In fact, it  
10 entails a larger sample size and study duration, and the currently available technical and human resources  
11 would not be sufficient to sustain MMU intervention delivery in more than two nursing homes at the same  
12 time. It is also noteworthy that most of the existing studies included in the Santosaputri review<sup>13</sup> adopted a  
13 quasi-experimental design, because, in research on complex care interventions, methodological soundness  
14 must always face practical considerations on feasibility.<sup>28</sup>

15 In conclusion, if the results of this study suggest benefits for patients and the health care system, future  
16 investigations with sounder methodology should be implemented to assess a large-scale application of the  
17 proposed care model.

1 1 **Contributors**

2  
3 2 A.N., B.P., S.L., P.M., E.B., M.F. and T.M. conceptualised the project and designed the intervention. F.D.,  
4  
5 3 A.T., P.S., F.P., B.S. and C.C. provided relevant contributions for study conception and design. E.I. gave  
6  
7 4 statistical consult. A.N., C.C., F.D. and A.T. drafted the manuscript. All the authors read and approved the  
8  
9  
10 5 final manuscript.

11 6  
12  
13  
14 7 **Funding**

15  
16 8 This research received no specific grant from any funding agency in the public, commercial or not-for-profit  
17  
18 9 sectors.

19  
20 10  
21  
22 11 **Competing interests**

23  
24 12 None declared.

25  
26 13  
27  
28 14 **Patient consent**

29  
30 15 Not required.

31  
32 16  
33  
34 17 **Ethics approval**

35  
36  
37 18 The study was approved by the competent Ethics Committee (Comitato Etico Area Vasta Emilia Nord,  
38  
39 19 Emilia-Romagna region), under the ID 846/2019/OSS/AOUPR.

40  
41 20

42  
43 21

44  
45 22

46  
47

48  
49

50  
51

52  
53

54  
55

56  
57

58  
59

60



1  
2  
3  
4  
5  
6  
7  
8  
9  
10  
11  
12  
13  
14  
15  
16  
17  
18  
19  
20  
21  
22  
23  
24  
25  
26  
27  
28  
29  
30  
31  
32  
33  
34  
35  
36  
37  
38  
39  
40  
41  
42  
43  
44  
45  
46  
47  
48  
49  
50  
51  
52  
53  
54  
55  
56  
57  
58  
59  
60  
**REFERENCES**

1. Corazza GR, Formagnana P, Lenti MV. Bringing complexity into clinical practice: an internistic approach. *Eur J Intern Med* 2019;61:9-14.
2. Mannucci PM, Nobili A, Pasina L, *et al*. Polypharmacy in older people: lessons from 10 years of experience with the REPOSI register. *Intern Emerg Med* 2018;13(8):1191-200.
3. Samaras N, Chevalley T, Samaras D, *et al*. Older patients in the Emergency Department: a review. *Ann Emerg Med* 2010;56(3):261-9.
4. Aminzadeh F, Dalziel WB. Older adults in the emergency department: a systematic review of patterns of use, adverse outcomes, and effectiveness of interventions. *Ann Emerg Med* 2002;39(3):238-47.
5. Salvi F, Morichi V, Grilli A, *et al*. The elderly in the emergency department: a critical review of problems and solutions. *Intern Emerg Med* 2007;2(4):292-301.
6. Wyman JF, Hazzard WR. Preventing avoidable hospitalizations of nursing home residents: a multipronged approach to a perennial problem. *J Am Geriatr Soc* 2010;58(4):50-1.
7. LaMantia MA, Lane KA, Tu W, *et al*. Patterns of Emergency Department use among long-stay nursing home residents with differing levels of dementia severity. *J Am Med Dir Assoc* 2016;17(6):541-546.
8. Gruneir A, Cigsar C, Wang X, *et al*. Repeat emergency department visits by nursing home residents: a cohort study using health administrative data. *BMC Geriatr* 2018;18(1):157.
9. Jay S, Whittaker P, Mcintosh J, *et al*. Can consultant geriatrician led comprehensive geriatric assessment in the emergency department reduce hospital admission rates? A systematic review. *Age Ageing* 2017;46(3):366-72.
10. Limpawattana P, Phungoen P, Mitsungnem T, *et al*. Atypical presentation of older adults at the emergency department and associated factors. *Arch Gerontol Geriatr* 2016;62:97-102.
11. Roberts DC, McKay MP, Shaffer A. Increasing rates of Emergency Department visits for elderly patients in the United States, 1993 to 2003. *Ann Emerg Med* 2008;51(6):769-74.
12. Buurman BM, Hoogerduijn JG, van Gemert EA, *et al*. Clinical characteristics and outcomes of hospitalized older patients with distinct risk profiles for functional decline: a prospective cohort study. *PLoS One* 2012;7(1):e29621.

- 1 13. Santosaputri E, Laver K, To T. Efficacy of interventions led by staff with geriatrics expertise in  
2 reducing hospitalisation in nursing home residents: A systematic review. *Australas J Ageing*  
3 2019;38(1):5-14.  
4 2  
5 3  
6 3  
7 4  
8 14. Street M, Considine J, Livingston P, *et al.* In-reach nursing services improve older patient outcomes  
9 and access to emergency care. *Australas J Ageing* 2015;34(2):115-120.  
10 5  
11 6  
12 15. Hutchinson AF, Parikh S, Tacey M, *et al.* A longitudinal cohort study evaluating the impact of a  
13 geriatrician-led residential care outreach service on acute healthcare utilization. *Age Ageing*  
14 2015;44:365-370.  
15 7  
16 8  
17 16. Schippinger W, Hartinger G, Hierzer E, *et al.* Mobile geriatric consultant services for rest homes:  
18 9 study of the effects of consultations by internal medicine specialists in the medical care of rest home  
19 residents. *Z Gerontol Geriatr* 2012;45:735-41.  
20 10  
21 11  
22 17. Fan L, Hou XY, Zhao J, *et al.* Hospital in the Nursing Home program reduces emergency department  
23 12 presentations and hospital admissions from residential aged care facilities in Queensland, Australia: a  
24 13 quasi-experimental study. *BMC Health Serv Res* 2016;16:46.  
25 14  
26 15  
27 18. Boockvar KS, Teresi JA, Inouye SK. Preliminary data: an adapted hospital elder life program to  
28 16 prevent delirium and reduce complications of acute illness in long-term care delivered by certified  
29 17 nursing assistants. *J Am Geriatr Soc* 2016;64:1108-1113.  
30 18  
31 19. Gregersen M, Zintchouk D, Borris LC, *et al.* A geriatric multidisciplinary and tailor-made hospital-at-  
32 19 home method in nursing home residents with hip fracture. *Geriatr Orthop Surg Rehab* 2011;2(4):148-  
33 20 154.  
34 21  
35 22  
36 20. Kirsebom M, Hedström M, Wadensten B, *et al.* The frequency of and reasons for acute hospital  
37 21 transfers of older nursing home residents. *Arch Gerontol Geriatr* 2014;58:115-120.  
38 22  
39 23  
40 21. Meschi T, Nouvenne A, Maggio M, *et al.* Bed-blockers: an 8 year experience of clinical management.  
41 24 *Eur J Intern Med* 2012;23(2):e.73-e.74.  
42 25  
43 22. Caminiti C, Meschi T, Braglia L, *et al.* Reducing unnecessary hospital days to improve quality of care  
44 26 through physician accountability: a cluster randomised trial. *BMC Health Serv Res* 2013;13:14.  
45 27  
46 23. Meschi T, Ticinesi A, Prati B, *et al.* A novel organizational model to face the challenge of multimorbid  
47 28 elderly patients in an internal medicine setting: a case study from Parma Hospital, Italy. *Intern Emerg*  
48 29 *Med* 2016;11(5):667-76.

- 1 1 24. Craig P, Dieppe P, Macintyre S, *et al*. Developing and evaluating complex interventions: the new  
2  
3 2 Medical Research Council guidance. *BMJ* 2008;337:a1655.  
4  
5 3 25. Trahan LM, Spiers JA, Cummings GG. Decisions to transfer nursing home residents to emergency  
6  
7 4 departments: a scoping review of contributing factors and staff perspectives. *J Am Med Dir Assoc*  
8  
9 5 2016;17(11):994-1005.  
10  
11 6 26. Arendts G, Howard K. The interface between residential aged care and the emergency department: a  
12  
13 7 systematic review. *Age Ageing* 2010;39:306-12.  
14  
15 8 27. Diaz-Gegundez M, Paluzie G, Sanz-Ballester C, *et al*. Evaluation of an intervention program in  
16  
17 9 nursing homes to reduce hospital attendance. *Rev Esp Geriatr Gerontol* 2011;46:261-4.  
18  
19 10 28. Bärnighausen T, Tugwell P, Röttingen JA, *et al*. Quasi-experimental study designs series-paper 4: uses  
20  
21 11 and value. *J Clin Epidemiol* 2017; 89: 21-29.  
22  
23 12 29. Ticinesi A, Scarlata S, Nouvenne A, *et al*. The Geriatric Patient: The Ideal One for Chest  
24  
25 13 Ultrasonography? A Review From the Chest Ultrasound in the Elderly Study Group (GRETA) of the  
26  
27 14 Italian Society of Gerontology and Geriatrics (SIGG). *J Am Med Dir Assoc* 2019; online first Aug 6.  
28  
29 15 Doi: 10.1016/j.jamda.2019.06.018.  
30  
31 16 30. Fröhlich E, Beller K, Muller R, *et al*. Point of Care Ultrasound in Geriatric Patients: Prospective  
32  
33 17 Evaluation of a Portable Handheld Ultrasound Device. *Ultraschall Med* 2019; online first Apr 26. Doi:  
34  
35 18 10.1055/a-0889-8070.  
36  
37 19 31. Narula J, Chandrashekhara Y, Braunwald E. Time to Add a Fifth Pillar to Bedside Physical  
38  
39 20 Examination: Inspection, Palpation, Percussion, Auscultation, and Insonation. *JAMA Cardiol*  
40  
41 21 2018;3(4):346-350.  
42  
43  
44  
45  
46  
47  
48  
49  
50  
51  
52  
53  
54  
55  
56  
57  
58  
59  
60

**TABLE 1**

Overview of possible expected clinical situations for which a Multidisciplinary Mobile Unit consultation may be activated, and possible management.

| Clinical situation                                                  | Clinical question                                                                                                                                                | Mobile Unit Intervention                                                                                                                                          | Disposition                                                                                        |
|---------------------------------------------------------------------|------------------------------------------------------------------------------------------------------------------------------------------------------------------|-------------------------------------------------------------------------------------------------------------------------------------------------------------------|----------------------------------------------------------------------------------------------------|
| Dyspnea of unknown origin                                           | Pulmonary? Cardiac? Embolism?<br>Other causes?                                                                                                                   | Chest and Abdomen Ultrasound. Arterial Gas sample, ECG, intravenous antibiotic administration                                                                     | Appropriate diagnosis and treatment on site. Immediate or scheduled admission whenever appropriate |
| Abdominal pain                                                      | Gallbladder stones? Cholecystitis?<br>Renal colic? Diverticular disease?<br>Urinary retention? Faecal impaction? Peritonitis? Ascites?<br>Acute/subacute Hernia? | Abdomen ultrasound, basic blood tests, intravenous antibiotic administration                                                                                      | Appropriate diagnosis and treatment on site. Immediate or scheduled admission whenever appropriate |
| Hematuria                                                           | UTI? Catheter dysfunction? Bladder polyps? Stones?                                                                                                               | Abdomen ultrasound, Bladder lavage, Catheter (re-)positioning, Intravenous antibiotic administration                                                              | Appropriate diagnosis and treatment on site. Immediate or scheduled admission whenever appropriate |
| Psychomotor agitation in previously stable dementia                 | Inadequate therapy? Emerging internistic problem? Other                                                                                                          | CGA, Neurogeriatric visit, exclusion of internistic-emerging problem, ECG, Thoracic&abdominal US                                                                  | Appropriate diagnosis and treatment on site.                                                       |
| Fever                                                               | Origin?                                                                                                                                                          | Thoracic&abdominal US, basic blood test                                                                                                                           | Excluding common differential diagnosis                                                            |
| Absence of peripheral veins for drugs or nutrients infusion         | How to find adequate venous access                                                                                                                               | US guided Central venous catheter or PICC or peripheral access                                                                                                    | Securing patient                                                                                   |
| Monolateral leg edema                                               | DVT? Erysipelas? Trauma?                                                                                                                                         | Venous and soft tissues ultrasound                                                                                                                                | Appropriate diagnosis and treatment on site.                                                       |
| Terminal illness                                                    | Palliation strategy? How to get symptoms relief?                                                                                                                 | CGA. Multidisciplinary assessment. Positioning of drains (eg abdominal drainage for ascites). Interview with relatives / caregivers and GP for sharing strategies | Appropriate management.                                                                            |
| Ultrasound exam in a patient who can be transported with difficulty | GP's question                                                                                                                                                    | Abdominal, cardiac, arterial, thyroid, neck ultrasound                                                                                                            | Appropriate assessment                                                                             |

1  
2  
3 ECG = Electrocardiogram; UTI = Urinary Tract Infection; CGA = Comprehensive Geriatric Assessment; US = Ultrasound; PICC = Peripherally-Inserted Central Venous  
4 Catheter; DVT = Deep Vein Thrombosis; GP = General Practitioner.  
5  
6  
7  
8  
9  
10  
11  
12  
13  
14  
15  
16  
17  
18  
19  
20  
21  
22  
23  
24  
25  
26  
27  
28  
29  
30  
31  
32  
33  
34  
35  
36  
37  
38  
39  
40  
41  
42  
43  
44  
45  
46

For peer review only

1  
2  
3  
4  
5  
6  
7  
8  
9  
10  
11  
12  
13  
14  
15  
16  
17  
18  
19  
20  
21  
22  
23  
24  
25  
26  
27  
28  
29  
30  
31  
32  
33  
34  
35  
36  
37  
38  
39  
40  
41  
42  
43  
44  
45  
46  
47  
48  
49  
50  
51  
52  
53  
54  
55  
56  
57  
58  
59  
60

**FIGURE 1**

Description of the intervention of MMU Team.

For peer review only

**FIGURE 2**

Results of pilot phase.

For peer review only

1  
2  
3  
4  
5  
6  
7  
8  
9  
10  
11  
12  
13  
14  
15  
16  
17  
18  
19  
20  
21  
22  
23  
24  
25  
26  
27  
28  
29  
30  
31  
32  
33  
34  
35  
36  
37  
38  
39  
40  
41  
42  
43  
44  
45  
46  
47  
48  
49  
50  
51  
52  
53  
54  
55  
56  
57  
58  
59  
60

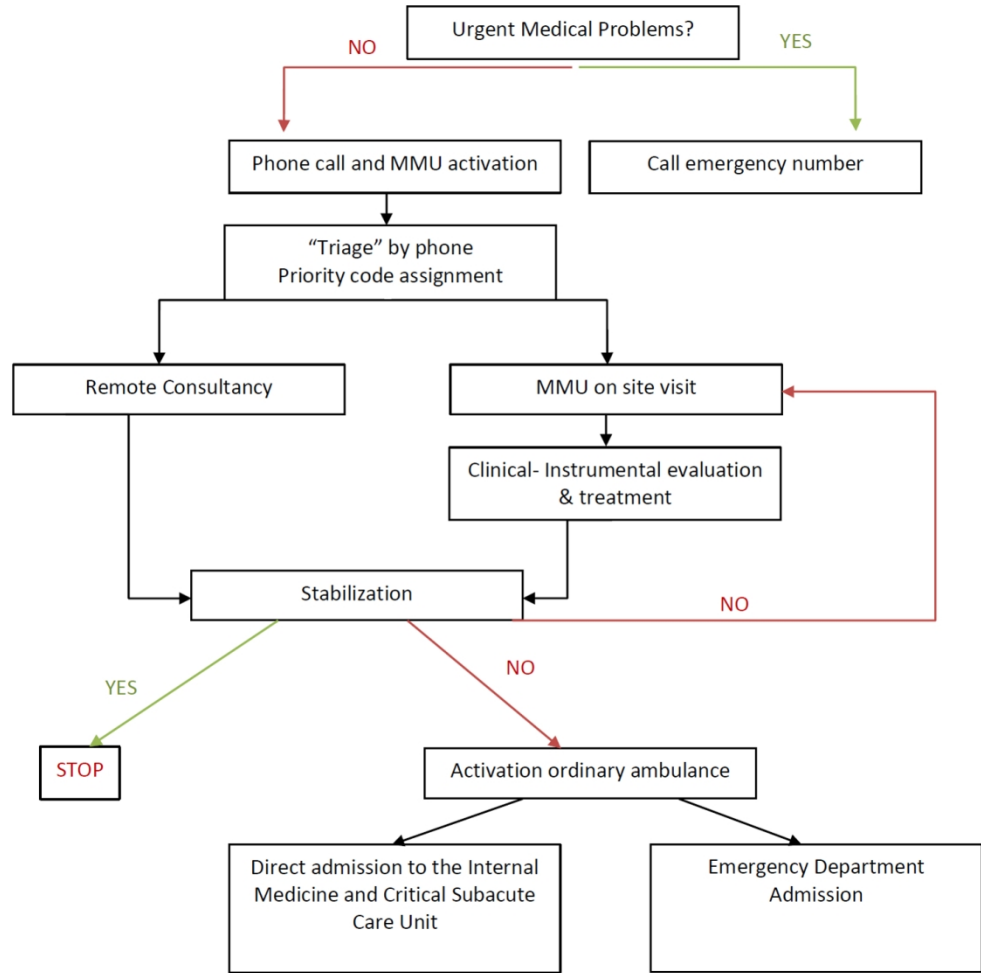

Description of the intervention of MMU Team

95x95mm (400 x 400 DPI)



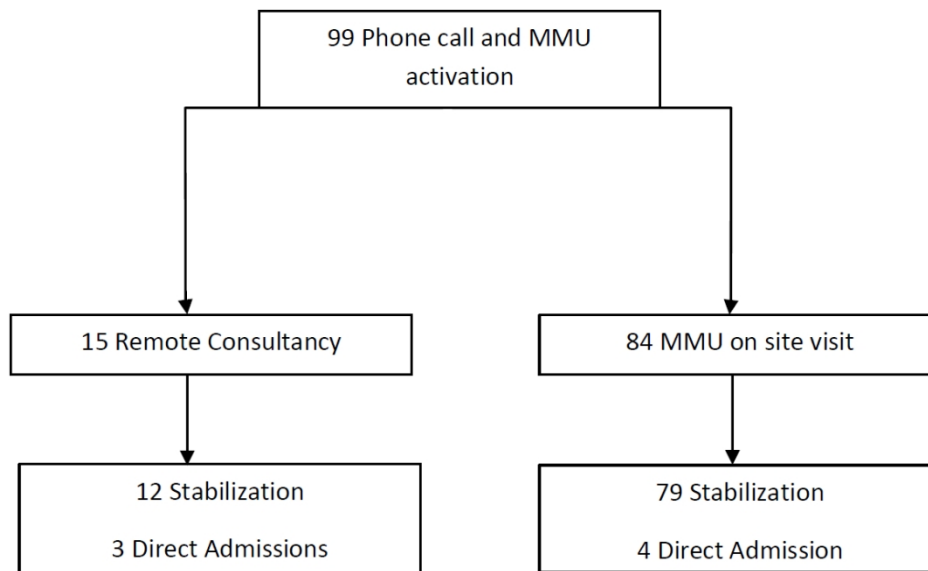

Results of pilot phase

78x48mm (400 x 400 DPI)

# Reporting checklist for protocol of a clinical trial.

Based on the SPIRIT guidelines.

## Instructions to authors

Complete this checklist by entering the page numbers from your manuscript where readers will find each of the items listed below.

Your article may not currently address all the items on the checklist. Please modify your text to include the missing information. If you are certain that an item does not apply, please write "n/a" and provide a short explanation.

Upload your completed checklist as an extra file when you submit to a journal.

In your methods section, say that you used the SPIRIT reporting guidelines, and cite them as:

Chan A-W, Tetzlaff JM, Altman DG, Laupacis A, Gøtzsche PC, Krleža-Jerić K, Hróbjartsson A, Mann H, Dickersin K, Berlin J, Doré C, Parulekar W, Summerskill W, Groves T, Schulz K, Sox H, Rockhold FW, Rennie D, Moher D. SPIRIT 2013 Statement: Defining standard protocol items for clinical trials. *Ann Intern Med.* 2013;158(3):200-207

|                                   | Reporting Item                                                                                                                  | Page Number |
|-----------------------------------|---------------------------------------------------------------------------------------------------------------------------------|-------------|
| <b>Administrative information</b> |                                                                                                                                 |             |
| Title                             | <a href="#">#1</a> Descriptive title identifying the study design, population, interventions, and, if applicable, trial acronym | 1           |

|    |                     |                     |                                                    |                    |
|----|---------------------|---------------------|----------------------------------------------------|--------------------|
| 1  | Trial registration  | <a href="#">#2a</a> | Trial identifier and registry name. If not yet     | 2, end of abstract |
| 2  |                     |                     | registered, name of intended registry              |                    |
| 3  |                     |                     |                                                    |                    |
| 4  |                     |                     |                                                    |                    |
| 5  |                     |                     |                                                    |                    |
| 6  | Trial registration: | <a href="#">#2b</a> | All items from the World Health Organization       | 2                  |
| 7  |                     |                     |                                                    |                    |
| 8  | data set            |                     | Trial Registration Data Set                        |                    |
| 9  |                     |                     |                                                    |                    |
| 10 |                     |                     |                                                    |                    |
| 11 |                     |                     |                                                    |                    |
| 12 | Protocol version    | <a href="#">#3</a>  | Date and version identifier                        | Supplemental       |
| 13 |                     |                     |                                                    |                    |
| 14 |                     |                     |                                                    | Material           |
| 15 |                     |                     |                                                    |                    |
| 16 |                     |                     |                                                    |                    |
| 17 | Funding             | <a href="#">#4</a>  | Sources and types of financial, material, and      | 14                 |
| 18 |                     |                     | other support                                      |                    |
| 19 |                     |                     |                                                    |                    |
| 20 |                     |                     |                                                    |                    |
| 21 |                     |                     |                                                    |                    |
| 22 |                     |                     |                                                    |                    |
| 23 | Roles and           | <a href="#">#5a</a> | Names, affiliations, and roles of protocol         | 1, 14              |
| 24 |                     |                     |                                                    |                    |
| 25 | responsibilities:   |                     | contributors                                       |                    |
| 26 |                     |                     |                                                    |                    |
| 27 | contributorship     |                     |                                                    |                    |
| 28 |                     |                     |                                                    |                    |
| 29 |                     |                     |                                                    |                    |
| 30 | Roles and           | <a href="#">#5b</a> | Name and contact information for the trial         | N/A (page 14)      |
| 31 |                     |                     |                                                    |                    |
| 32 | responsibilities:   |                     | sponsor                                            |                    |
| 33 |                     |                     |                                                    |                    |
| 34 | sponsor contact     |                     |                                                    |                    |
| 35 |                     |                     |                                                    |                    |
| 36 |                     |                     |                                                    |                    |
| 37 | information         |                     |                                                    |                    |
| 38 |                     |                     |                                                    |                    |
| 39 |                     |                     |                                                    |                    |
| 40 | Roles and           | <a href="#">#5c</a> | Role of study sponsor and funders, if any, in      | N/A (page 13)      |
| 41 |                     |                     |                                                    |                    |
| 42 | responsibilities:   |                     | study design; collection, management, analysis,    |                    |
| 43 |                     |                     |                                                    |                    |
| 44 | sponsor and funder  |                     | and interpretation of data; writing of the report; |                    |
| 45 |                     |                     |                                                    |                    |
| 46 |                     |                     |                                                    |                    |
| 47 |                     |                     |                                                    |                    |
| 48 |                     |                     |                                                    |                    |
| 49 |                     |                     |                                                    |                    |
| 50 |                     |                     |                                                    |                    |
| 51 |                     |                     |                                                    |                    |
| 52 |                     |                     |                                                    |                    |
| 53 |                     |                     |                                                    |                    |
| 54 |                     |                     |                                                    |                    |
| 55 |                     |                     |                                                    |                    |
| 56 |                     |                     |                                                    |                    |
| 57 |                     |                     |                                                    |                    |
| 58 |                     |                     |                                                    |                    |
| 59 |                     |                     |                                                    |                    |
| 60 |                     |                     |                                                    |                    |

|    |                      |                     |                                                     |      |
|----|----------------------|---------------------|-----------------------------------------------------|------|
| 1  | Roles and            | <a href="#">#5d</a> | Composition, roles, and responsibilities of the     | 13   |
| 2  |                      |                     |                                                     |      |
| 3  | responsibilities:    |                     | coordinating centre, steering committee,            |      |
| 4  |                      |                     |                                                     |      |
| 5  | committees           |                     | endpoint adjudication committee, data               |      |
| 6  |                      |                     |                                                     |      |
| 7  |                      |                     | management team, and other individuals or           |      |
| 8  |                      |                     |                                                     |      |
| 9  |                      |                     | groups overseeing the trial, if applicable (see     |      |
| 10 |                      |                     |                                                     |      |
| 11 |                      |                     | Item 21a for data monitoring committee)             |      |
| 12 |                      |                     |                                                     |      |
| 13 |                      |                     |                                                     |      |
| 14 |                      |                     |                                                     |      |
| 15 | <b>Introduction</b>  |                     |                                                     |      |
| 16 |                      |                     |                                                     |      |
| 17 |                      |                     |                                                     |      |
| 18 | Background and       | <a href="#">#6a</a> | Description of research question and                | 4-5  |
| 19 |                      |                     |                                                     |      |
| 20 | rationale            |                     | justification for undertaking the trial, including  |      |
| 21 |                      |                     |                                                     |      |
| 22 |                      |                     | summary of relevant studies (published and          |      |
| 23 |                      |                     |                                                     |      |
| 24 |                      |                     | unpublished) examining benefits and harms for       |      |
| 25 |                      |                     |                                                     |      |
| 26 |                      |                     | each intervention                                   |      |
| 27 |                      |                     |                                                     |      |
| 28 |                      |                     |                                                     |      |
| 29 |                      |                     |                                                     |      |
| 30 |                      |                     |                                                     |      |
| 31 | Background and       | <a href="#">#6b</a> | Explanation for choice of comparators               | 4-5  |
| 32 |                      |                     |                                                     |      |
| 33 | rationale: choice of |                     |                                                     |      |
| 34 |                      |                     |                                                     |      |
| 35 | comparators          |                     |                                                     |      |
| 36 |                      |                     |                                                     |      |
| 37 |                      |                     |                                                     |      |
| 38 | Objectives           | <a href="#">#7</a>  | Specific objectives or hypotheses                   | 6, 9 |
| 39 |                      |                     |                                                     |      |
| 40 |                      |                     |                                                     |      |
| 41 | Trial design         | <a href="#">#8</a>  | Description of trial design including type of trial | 9-10 |
| 42 |                      |                     |                                                     |      |
| 43 |                      |                     | (eg, parallel group, crossover, factorial, single   |      |
| 44 |                      |                     |                                                     |      |
| 45 |                      |                     | group), allocation ratio, and framework (eg,        |      |
| 46 |                      |                     |                                                     |      |
| 47 |                      |                     | superiority, equivalence, non-inferiority,          |      |
| 48 |                      |                     |                                                     |      |
| 49 |                      |                     | exploratory)                                        |      |
| 50 |                      |                     |                                                     |      |
| 51 |                      |                     |                                                     |      |
| 52 |                      |                     |                                                     |      |
| 53 |                      |                     |                                                     |      |

## Methods:

### Participants,

1 interventions, and

2  
3 outcomes

4  
5

|                                                                                  |                      |                                                                                                                                                                                                  |                                                                       |
|----------------------------------------------------------------------------------|----------------------|--------------------------------------------------------------------------------------------------------------------------------------------------------------------------------------------------|-----------------------------------------------------------------------|
| 6 Study setting                                                                  | <a href="#">#9</a>   | Description of study settings (eg, community clinic, academic hospital) and list of countries where data will be collected. Reference to where list of study sites can be obtained               | 6                                                                     |
| 7<br>8<br>9<br>10<br>11<br>12<br>13<br>14                                        |                      |                                                                                                                                                                                                  |                                                                       |
| 15 Eligibility criteria                                                          | <a href="#">#10</a>  | Inclusion and exclusion criteria for participants. If applicable, eligibility criteria for study centres and individuals who will perform the interventions (eg, surgeons, psychotherapists)     | 10                                                                    |
| 16<br>17<br>18<br>19<br>20<br>21<br>22<br>23<br>24                               |                      |                                                                                                                                                                                                  |                                                                       |
| 25 Interventions:<br>26 description                                              | <a href="#">#11a</a> | Interventions for each group with sufficient detail to allow replication, including how and when they will be administered                                                                       | 7-9, 10                                                               |
| 27<br>28<br>29<br>30<br>31<br>32                                                 |                      |                                                                                                                                                                                                  |                                                                       |
| 33 Interventions:<br>34 modifications                                            | <a href="#">#11b</a> | Criteria for discontinuing or modifying allocated interventions for a given trial participant (eg, drug dose change in response to harms, participant request, or improving / worsening disease) | N/A (complex intervention on organization of care)                    |
| 35<br>36<br>37<br>38<br>39<br>40<br>41<br>42<br>43<br>44                         |                      |                                                                                                                                                                                                  |                                                                       |
| 45 Interventions:<br>46 adherence                                                | <a href="#">#11c</a> | Strategies to improve adherence to intervention protocols, and any procedures for monitoring adherence (eg, drug tablet return; laboratory tests)                                                | N/A (the intervention concerns organization of care in nursing homes) |
| 47<br>48<br>49<br>50<br>51<br>52<br>53<br>54<br>55<br>56<br>57<br>58<br>59<br>60 |                      |                                                                                                                                                                                                  |                                                                       |

|    |                      |                      |                                                   |                       |
|----|----------------------|----------------------|---------------------------------------------------|-----------------------|
| 1  | Interventions:       | <a href="#">#11d</a> | Relevant concomitant care and interventions       | 7-10                  |
| 2  |                      |                      |                                                   |                       |
| 3  | concomitant care     |                      | that are permitted or prohibited during the trial |                       |
| 4  |                      |                      |                                                   |                       |
| 5  |                      |                      |                                                   |                       |
| 6  | Outcomes             | <a href="#">#12</a>  | Primary, secondary, and other outcomes,           | 10                    |
| 7  |                      |                      |                                                   |                       |
| 8  |                      |                      | including the specific measurement variable       |                       |
| 9  |                      |                      |                                                   |                       |
| 10 |                      |                      |                                                   |                       |
| 11 |                      |                      | (eg, systolic blood pressure), analysis metric    |                       |
| 12 |                      |                      |                                                   |                       |
| 13 |                      |                      | (eg, change from baseline, final value, time to   |                       |
| 14 |                      |                      |                                                   |                       |
| 15 |                      |                      | event), method of aggregation (eg, median,        |                       |
| 16 |                      |                      |                                                   |                       |
| 17 |                      |                      | proportion), and time point for each outcome.     |                       |
| 18 |                      |                      |                                                   |                       |
| 19 |                      |                      | Explanation of the clinical relevance of chosen   |                       |
| 20 |                      |                      |                                                   |                       |
| 21 |                      |                      | efficacy and harm outcomes is strongly            |                       |
| 22 |                      |                      |                                                   |                       |
| 23 |                      |                      | recommended                                       |                       |
| 24 |                      |                      |                                                   |                       |
| 25 |                      |                      |                                                   |                       |
| 26 |                      |                      |                                                   |                       |
| 27 |                      |                      |                                                   |                       |
| 28 | Participant timeline | <a href="#">#13</a>  | Time schedule of enrolment, interventions         | 11                    |
| 29 |                      |                      |                                                   |                       |
| 30 |                      |                      | (including any run-ins and washouts),             |                       |
| 31 |                      |                      |                                                   |                       |
| 32 |                      |                      | assessments, and visits for participants. A       |                       |
| 33 |                      |                      |                                                   |                       |
| 34 |                      |                      | schematic diagram is highly recommended (see      |                       |
| 35 |                      |                      |                                                   |                       |
| 36 |                      |                      | Figure)                                           |                       |
| 37 |                      |                      |                                                   |                       |
| 38 |                      |                      |                                                   |                       |
| 39 |                      |                      |                                                   |                       |
| 40 | Sample size          | <a href="#">#14</a>  | Estimated number of participants needed to        | 11                    |
| 41 |                      |                      |                                                   |                       |
| 42 |                      |                      | achieve study objectives and how it was           |                       |
| 43 |                      |                      |                                                   |                       |
| 44 |                      |                      | determined, including clinical and statistical    |                       |
| 45 |                      |                      |                                                   |                       |
| 46 |                      |                      | assumptions supporting any sample size            |                       |
| 47 |                      |                      |                                                   |                       |
| 48 |                      |                      | calculations                                      |                       |
| 49 |                      |                      |                                                   |                       |
| 50 |                      |                      |                                                   |                       |
| 51 |                      |                      |                                                   |                       |
| 52 | Recruitment          | <a href="#">#15</a>  | Strategies for achieving adequate participant     | N/A (all residents in |
| 53 |                      |                      |                                                   | participating nursing |
| 54 |                      |                      | enrolment to reach target sample size             | homes will be         |
| 55 |                      |                      |                                                   |                       |
| 56 |                      |                      |                                                   |                       |
| 57 |                      |                      |                                                   |                       |
| 58 |                      |                      |                                                   |                       |
| 59 |                      |                      |                                                   |                       |
| 60 |                      |                      |                                                   |                       |

eligible for the  
study)

**Methods:**

**Assignment of  
interventions (for  
controlled trials)**

|                                        |                      |                                                                                                                                                                                                                                                                                                                                                          |                                                                            |
|----------------------------------------|----------------------|----------------------------------------------------------------------------------------------------------------------------------------------------------------------------------------------------------------------------------------------------------------------------------------------------------------------------------------------------------|----------------------------------------------------------------------------|
| Allocation:<br>sequence<br>generation  | <a href="#">#16a</a> | Method of generating the allocation sequence (eg, computer-generated random numbers), and list of any factors for stratification. To reduce predictability of a random sequence, details of any planned restriction (eg, blocking) should be provided in a separate document that is unavailable to those who enrol participants or assign interventions | N/A (quasi-<br>experimental study<br>design on<br>organization of<br>care) |
| Allocation<br>concealment<br>mechanism | <a href="#">#16b</a> | Mechanism of implementing the allocation sequence (eg, central telephone; sequentially numbered, opaque, sealed envelopes), describing any steps to conceal the sequence until interventions are assigned                                                                                                                                                | N/A (quasi-<br>experimental study<br>design on<br>organization of<br>care) |
| Allocation:<br>implementation          | <a href="#">#16c</a> | Who will generate the allocation sequence, who will enrol participants, and who will assign participants to interventions                                                                                                                                                                                                                                | N/A (quasi-<br>experimental study<br>design on<br>organization of<br>care) |

|    |                        |                      |                                                      |                    |
|----|------------------------|----------------------|------------------------------------------------------|--------------------|
| 1  | Blinding (masking)     | <a href="#">#17a</a> | Who will be blinded after assignment to              | N/A (quasi-        |
| 2  |                        |                      | interventions (eg, trial participants, care          | experimental study |
| 3  |                        |                      | providers, outcome assessors, data analysts),        | design on          |
| 4  |                        |                      | and how                                              | organization of    |
| 5  |                        |                      |                                                      | care)              |
| 6  |                        |                      |                                                      |                    |
| 7  |                        |                      |                                                      |                    |
| 8  |                        |                      |                                                      |                    |
| 9  |                        |                      |                                                      |                    |
| 10 |                        |                      |                                                      |                    |
| 11 |                        |                      |                                                      |                    |
| 12 |                        |                      |                                                      |                    |
| 13 | Blinding (masking):    | <a href="#">#17b</a> | If blinded, circumstances under which                | N/A (quasi-        |
| 14 | emergency              |                      | unblinding is permissible, and procedure for         | experimental study |
| 15 |                        |                      | revealing a participant's allocated intervention     | design on          |
| 16 | unblinding             |                      | during the trial                                     | organization of    |
| 17 |                        |                      |                                                      | care)              |
| 18 |                        |                      |                                                      |                    |
| 19 |                        |                      |                                                      |                    |
| 20 |                        |                      |                                                      |                    |
| 21 |                        |                      |                                                      |                    |
| 22 |                        |                      |                                                      |                    |
| 23 |                        |                      |                                                      |                    |
| 24 |                        |                      |                                                      |                    |
| 25 | <b>Methods: Data</b>   |                      |                                                      |                    |
| 26 | <b>collection,</b>     |                      |                                                      |                    |
| 27 | <b>management, and</b> |                      |                                                      |                    |
| 28 | <b>analysis</b>        |                      |                                                      |                    |
| 29 |                        |                      |                                                      |                    |
| 30 |                        |                      |                                                      |                    |
| 31 |                        |                      |                                                      |                    |
| 32 |                        |                      |                                                      |                    |
| 33 |                        |                      |                                                      |                    |
| 34 |                        |                      |                                                      |                    |
| 35 | Data collection plan   | <a href="#">#18a</a> | Plans for assessment and collection of               | 10-11              |
| 36 |                        |                      | outcome, baseline, and other trial data,             |                    |
| 37 |                        |                      | including any related processes to promote           |                    |
| 38 |                        |                      | data quality (eg, duplicate measurements,            |                    |
| 39 |                        |                      | training of assessors) and a description of study    |                    |
| 40 |                        |                      | instruments (eg, questionnaires, laboratory          |                    |
| 41 |                        |                      | tests) along with their reliability and validity, if |                    |
| 42 |                        |                      | known. Reference to where data collection            |                    |
| 43 |                        |                      | forms can be found, if not in the protocol           |                    |
| 44 |                        |                      |                                                      |                    |
| 45 |                        |                      |                                                      |                    |
| 46 |                        |                      |                                                      |                    |
| 47 |                        |                      |                                                      |                    |
| 48 |                        |                      |                                                      |                    |
| 49 |                        |                      |                                                      |                    |
| 50 |                        |                      |                                                      |                    |
| 51 |                        |                      |                                                      |                    |
| 52 |                        |                      |                                                      |                    |
| 53 |                        |                      |                                                      |                    |
| 54 |                        |                      |                                                      |                    |
| 55 |                        |                      |                                                      |                    |
| 56 |                        |                      |                                                      |                    |
| 57 |                        |                      |                                                      |                    |
| 58 |                        |                      |                                                      |                    |
| 59 |                        |                      |                                                      |                    |
| 60 |                        |                      |                                                      |                    |



|                                                                                        |                                                        |                      |                                                                                                                                                                                                                                                                   |                                                               |
|----------------------------------------------------------------------------------------|--------------------------------------------------------|----------------------|-------------------------------------------------------------------------------------------------------------------------------------------------------------------------------------------------------------------------------------------------------------------|---------------------------------------------------------------|
| 1<br>2<br>3<br>4<br>5<br>6<br>7<br>8<br>9<br>10<br>11<br>12                            | Data collection<br>plan: retention                     | <a href="#">#18b</a> | Plans to promote participant retention and complete follow-up, including list of any outcome data to be collected for participants who discontinue or deviate from intervention protocols                                                                         | N/A (quasi-experimental study design on organization of care) |
| 13<br>14<br>15<br>16<br>17<br>18<br>19<br>20<br>21<br>22<br>23<br>24<br>25<br>26<br>27 | Data management                                        | <a href="#">#19</a>  | Plans for data entry, coding, security, and storage, including any related processes to promote data quality (eg, double data entry; range checks for data values). Reference to where details of data management procedures can be found, if not in the protocol | 11, 13                                                        |
| 28<br>29<br>30<br>31<br>32<br>33<br>34<br>35<br>36<br>37                               | Statistics:<br>outcomes                                | <a href="#">#20a</a> | Statistical methods for analysing primary and secondary outcomes. Reference to where other details of the statistical analysis plan can be found, if not in the protocol                                                                                          | 12                                                            |
| 38<br>39<br>40<br>41<br>42                                                             | Statistics: additional<br>analyses                     | <a href="#">#20b</a> | Methods for any additional analyses (eg, subgroup and adjusted analyses)                                                                                                                                                                                          | 12                                                            |
| 43<br>44<br>45<br>46<br>47<br>48<br>49<br>50<br>51<br>52                               | Statistics: analysis<br>population and<br>missing data | <a href="#">#20c</a> | Definition of analysis population relating to protocol non-adherence (eg, as randomised analysis), and any statistical methods to handle missing data (eg, multiple imputation)                                                                                   | N/A due to particular study design                            |

### Methods:

### Monitoring

|    |                      |                      |                                                   |                  |
|----|----------------------|----------------------|---------------------------------------------------|------------------|
| 1  | Data monitoring:     | <a href="#">#21a</a> | Composition of data monitoring committee          | 13               |
| 2  |                      |                      |                                                   |                  |
| 3  | formal committee     |                      | (DMC); summary of its role and reporting          |                  |
| 4  |                      |                      | structure; statement of whether it is             |                  |
| 5  |                      |                      | independent from the sponsor and competing        |                  |
| 6  |                      |                      | interests; and reference to where further details |                  |
| 7  |                      |                      | about its charter can be found, if not in the     |                  |
| 8  |                      |                      | protocol. Alternatively, an explanation of why a  |                  |
| 9  |                      |                      | DMC is not needed                                 |                  |
| 10 |                      |                      |                                                   |                  |
| 11 | Data monitoring:     | <a href="#">#21b</a> | Description of any interim analyses and           | 13               |
| 12 |                      |                      |                                                   |                  |
| 13 | interim analysis     |                      | stopping guidelines, including who will have      |                  |
| 14 |                      |                      | access to these interim results and make the      |                  |
| 15 |                      |                      | final decision to terminate the trial             |                  |
| 16 |                      |                      |                                                   |                  |
| 17 |                      |                      |                                                   |                  |
| 18 |                      |                      |                                                   |                  |
| 19 |                      |                      |                                                   |                  |
| 20 | Harms                | <a href="#">#22</a>  | Plans for collecting, assessing, reporting, and   | N/A due to       |
| 21 |                      |                      | managing solicited and spontaneously reported     | particular study |
| 22 |                      |                      | adverse events and other unintended effects of    | design           |
| 23 |                      |                      | trial interventions or trial conduct              |                  |
| 24 |                      |                      |                                                   |                  |
| 25 |                      |                      |                                                   |                  |
| 26 |                      |                      |                                                   |                  |
| 27 |                      |                      |                                                   |                  |
| 28 |                      |                      |                                                   |                  |
| 29 |                      |                      |                                                   |                  |
| 30 | Auditing             | <a href="#">#23</a>  | Frequency and procedures for auditing trial       | N/A due to       |
| 31 |                      |                      | conduct, if any, and whether the process will be  | particular study |
| 32 |                      |                      | independent from investigators and the sponsor    | design           |
| 33 |                      |                      |                                                   |                  |
| 34 |                      |                      |                                                   |                  |
| 35 |                      |                      |                                                   |                  |
| 36 |                      |                      |                                                   |                  |
| 37 |                      |                      |                                                   |                  |
| 38 |                      |                      |                                                   |                  |
| 39 |                      |                      |                                                   |                  |
| 40 | <b>Ethics and</b>    |                      |                                                   |                  |
| 41 | <b>dissemination</b> |                      |                                                   |                  |
| 42 |                      |                      |                                                   |                  |
| 43 |                      |                      |                                                   |                  |
| 44 |                      |                      |                                                   |                  |
| 45 | Research ethics      | <a href="#">#24</a>  | Plans for seeking research ethics committee /     | 12-13            |
| 46 |                      |                      |                                                   |                  |
| 47 | approval             |                      | institutional review board (REC / IRB) approval   |                  |
| 48 |                      |                      |                                                   |                  |
| 49 |                      |                      |                                                   |                  |
| 50 |                      |                      |                                                   |                  |
| 51 |                      |                      |                                                   |                  |
| 52 |                      |                      |                                                   |                  |
| 53 |                      |                      |                                                   |                  |
| 54 |                      |                      |                                                   |                  |
| 55 |                      |                      |                                                   |                  |
| 56 |                      |                      |                                                   |                  |
| 57 |                      |                      |                                                   |                  |
| 58 |                      |                      |                                                   |                  |
| 59 |                      |                      |                                                   |                  |
| 60 |                      |                      |                                                   |                  |

|    |                    |                      |                                                      |              |
|----|--------------------|----------------------|------------------------------------------------------|--------------|
| 1  | Protocol           | <a href="#">#25</a>  | Plans for communicating important protocol           | 12-13 +      |
| 2  |                    |                      |                                                      |              |
| 3  | amendments         |                      | modifications (eg, changes to eligibility criteria,  | supplemental |
| 4  |                    |                      | outcomes, analyses) to relevant parties (eg,         | material     |
| 5  |                    |                      | investigators, REC / IRBs, trial participants, trial |              |
| 6  |                    |                      | registries, journals, regulators)                    |              |
| 7  |                    |                      |                                                      |              |
| 8  |                    |                      |                                                      |              |
| 9  |                    |                      |                                                      |              |
| 10 |                    |                      |                                                      |              |
| 11 |                    |                      |                                                      |              |
| 12 |                    |                      |                                                      |              |
| 13 | Consent or assent  | <a href="#">#26a</a> | Who will obtain informed consent or assent           | 12-13 +      |
| 14 |                    |                      | from potential trial participants or authorised      | supplemental |
| 15 |                    |                      | surrogates, and how (see Item 32)                    | material     |
| 16 |                    |                      |                                                      |              |
| 17 |                    |                      |                                                      |              |
| 18 |                    |                      |                                                      |              |
| 19 |                    |                      |                                                      |              |
| 20 |                    |                      |                                                      |              |
| 21 | Consent or assent: | <a href="#">#26b</a> | Additional consent provisions for collection and     | 12-13 +      |
| 22 | ancillary studies  |                      | use of participant data and biological               | supplemental |
| 23 |                    |                      | specimens in ancillary studies, if applicable        | material     |
| 24 |                    |                      |                                                      |              |
| 25 |                    |                      |                                                      |              |
| 26 |                    |                      |                                                      |              |
| 27 |                    |                      |                                                      |              |
| 28 | Confidentiality    | <a href="#">#27</a>  | How personal information about potential and         | 12-13 +      |
| 29 |                    |                      | enrolled participants will be collected, shared,     | supplemental |
| 30 |                    |                      | and maintained in order to protect                   | material     |
| 31 |                    |                      | confidentiality before, during, and after the trial  |              |
| 32 |                    |                      |                                                      |              |
| 33 |                    |                      |                                                      |              |
| 34 |                    |                      |                                                      |              |
| 35 |                    |                      |                                                      |              |
| 36 |                    |                      |                                                      |              |
| 37 |                    |                      |                                                      |              |
| 38 | Declaration of     | <a href="#">#28</a>  | Financial and other competing interests for          | 14           |
| 39 | interests          |                      | principal investigators for the overall trial and    |              |
| 40 |                    |                      | each study site                                      |              |
| 41 |                    |                      |                                                      |              |
| 42 |                    |                      |                                                      |              |
| 43 |                    |                      |                                                      |              |
| 44 |                    |                      |                                                      |              |
| 45 |                    |                      |                                                      |              |
| 46 | Data access        | <a href="#">#29</a>  | Statement of who will have access to the final       | 12-13 +      |
| 47 |                    |                      | trial dataset, and disclosure of contractual         | supplemental |
| 48 |                    |                      | agreements that limit such access for                | material     |
| 49 |                    |                      | investigators                                        |              |
| 50 |                    |                      |                                                      |              |
| 51 |                    |                      |                                                      |              |
| 52 |                    |                      |                                                      |              |
| 53 |                    |                      |                                                      |              |
| 54 |                    |                      |                                                      |              |
| 55 |                    |                      |                                                      |              |
| 56 |                    |                      |                                                      |              |
| 57 |                    |                      |                                                      |              |
| 58 |                    |                      |                                                      |              |
| 59 |                    |                      |                                                      |              |
| 60 |                    |                      |                                                      |              |

|    |                       |                      |                                                    |                   |
|----|-----------------------|----------------------|----------------------------------------------------|-------------------|
| 1  | Ancillary and post    | <a href="#">#30</a>  | Provisions, if any, for ancillary and post-trial   | N/A due to        |
| 2  |                       |                      |                                                    |                   |
| 3  | trial care            |                      | care, and for compensation to those who suffer     | particular study  |
| 4  |                       |                      |                                                    |                   |
| 5  |                       |                      | harm from trial participation                      | design            |
| 6  |                       |                      |                                                    |                   |
| 7  |                       |                      |                                                    |                   |
| 8  | Dissemination         | <a href="#">#31a</a> | Plans for investigators and sponsor to             | 13 + supplemental |
| 9  |                       |                      |                                                    |                   |
| 10 | policy: trial results |                      | communicate trial results to participants,         | material          |
| 11 |                       |                      |                                                    |                   |
| 12 |                       |                      | healthcare professionals, the public, and other    |                   |
| 13 |                       |                      |                                                    |                   |
| 14 |                       |                      | relevant groups (eg, via publication, reporting in |                   |
| 15 |                       |                      |                                                    |                   |
| 16 |                       |                      | results databases, or other data sharing           |                   |
| 17 |                       |                      |                                                    |                   |
| 18 |                       |                      | arrangements), including any publication           |                   |
| 19 |                       |                      |                                                    |                   |
| 20 |                       |                      | restrictions                                       |                   |
| 21 |                       |                      |                                                    |                   |
| 22 |                       |                      |                                                    |                   |
| 23 |                       |                      |                                                    |                   |
| 24 |                       |                      |                                                    |                   |
| 25 | Dissemination         | <a href="#">#31b</a> | Authorship eligibility guidelines and any          | Supplemental      |
| 26 |                       |                      |                                                    |                   |
| 27 | policy: authorship    |                      | intended use of professional writers               | material          |
| 28 |                       |                      |                                                    |                   |
| 29 |                       |                      |                                                    |                   |
| 30 |                       |                      |                                                    |                   |
| 31 | Dissemination         | <a href="#">#31c</a> | Plans, if any, for granting public access to the   | Supplemental      |
| 32 |                       |                      |                                                    |                   |
| 33 | policy: reproducible  |                      | full protocol, participant-level dataset, and      | material          |
| 34 |                       |                      |                                                    |                   |
| 35 | research              |                      | statistical code                                   |                   |
| 36 |                       |                      |                                                    |                   |
| 37 |                       |                      |                                                    |                   |
| 38 | <b>Appendices</b>     |                      |                                                    |                   |
| 39 |                       |                      |                                                    |                   |
| 40 |                       |                      |                                                    |                   |
| 41 | Informed consent      | <a href="#">#32</a>  | Model consent form and other related               | Supplemental      |
| 42 |                       |                      |                                                    |                   |
| 43 | materials             |                      | documentation given to participants and            | material          |
| 44 |                       |                      |                                                    |                   |
| 45 |                       |                      | authorised surrogates                              |                   |
| 46 |                       |                      |                                                    |                   |
| 47 |                       |                      |                                                    |                   |
| 48 |                       |                      |                                                    |                   |
| 49 | Biological            | <a href="#">#33</a>  | Plans for collection, laboratory evaluation, and   | N/A due to study  |
| 50 |                       |                      |                                                    |                   |
| 51 | specimens             |                      | storage of biological specimens for genetic or     | design            |
| 52 |                       |                      |                                                    |                   |
| 53 |                       |                      |                                                    |                   |
| 54 |                       |                      | molecular analysis in the current trial and for    |                   |
| 55 |                       |                      |                                                    |                   |
| 56 |                       |                      | future use in ancillary studies, if applicable     |                   |
| 57 |                       |                      |                                                    |                   |
| 58 |                       |                      |                                                    |                   |
| 59 |                       |                      |                                                    |                   |
| 60 |                       |                      |                                                    |                   |

1 None The SPIRIT checklist is distributed under the terms of the Creative Commons Attribution  
2 License CC-BY-ND 3.0. This checklist can be completed online using <https://www.goodreports.org/>, a  
3 tool made by the [EQUATOR Network](#) in collaboration with [Penelope.ai](#)  
4  
5  
6  
7  
8  
9  
10

11 **NOTE: The original protocol approved by the competent Ethics Committee (in English language) has**  
12 **been uploaded as Supplemental Material.**  
13  
14  
15  
16  
17  
18  
19  
20  
21  
22  
23  
24  
25  
26  
27  
28  
29  
30  
31  
32  
33  
34  
35  
36  
37  
38  
39  
40  
41  
42  
43  
44  
45  
46  
47  
48  
49  
50  
51  
52  
53  
54  
55  
56  
57  
58  
59  
60
